# Supplementary material for: Trends in end digit preference for blood pressure and associations with cardiovascular outcomes in Canadian and UK primary care: a retrospective observational study
Source: PubMed Central journal article supplement — BMJ Open. 2019 Jan 24;9(1):e024970. doi: 10.1136/bmjopen-2018-024970 (PMC6347875; doi:10.1136/bmjopen-2018-024970), 2019-01-24
Supplement: bmjopen-2018-024970.draft_revisions.pdf [file bmjopen-2018-024970.draft_revisions.pdf]

# BMJ Open

BMJ Open is committed to open peer review. As part of this commitment we make the peer review history of every article we publish publicly available.

When an article is published we post the peer reviewers' comments and the authors' responses online. We also post the versions of the paper that were used during peer review. These are the versions that the peer review comments apply to.

The versions of the paper that follow are the versions that were submitted during the peer review process. They are not the versions of record or the final published versions. They should not be cited or distributed as the published version of this manuscript.

BMJ Open is an open access journal and the full, final, typeset and author-corrected version of record of the manuscript is available on our site with no access controls, subscription charges or pay-per-view fees (<http://bmjopen.bmj.com>).

If you have any questions on BMJ Open's open peer review process please email [info.bmjopen@bmj.com](mailto:info.bmjopen@bmj.com)

# BMJ Open

## Trends in systematic recording errors of blood pressure and associations with outcomes in Canadian and UK Primary Care: a retrospective observational study.

|                               |                                                                                                                                                                                                                                                                                                                                                                                                                                                                                                                                                                                                                                                                                                                                                                                                                                                                                                                                                                      |
|-------------------------------|----------------------------------------------------------------------------------------------------------------------------------------------------------------------------------------------------------------------------------------------------------------------------------------------------------------------------------------------------------------------------------------------------------------------------------------------------------------------------------------------------------------------------------------------------------------------------------------------------------------------------------------------------------------------------------------------------------------------------------------------------------------------------------------------------------------------------------------------------------------------------------------------------------------------------------------------------------------------|
| Journal:                      | <i>BMJ Open</i>                                                                                                                                                                                                                                                                                                                                                                                                                                                                                                                                                                                                                                                                                                                                                                                                                                                                                                                                                      |
| Manuscript ID                 | bmjopen-2018-024970                                                                                                                                                                                                                                                                                                                                                                                                                                                                                                                                                                                                                                                                                                                                                                                                                                                                                                                                                  |
| Article Type:                 | Research                                                                                                                                                                                                                                                                                                                                                                                                                                                                                                                                                                                                                                                                                                                                                                                                                                                                                                                                                             |
| Date Submitted by the Author: | 24-Jun-2018                                                                                                                                                                                                                                                                                                                                                                                                                                                                                                                                                                                                                                                                                                                                                                                                                                                                                                                                                          |
| Complete List of Authors:     | Greiver, Michelle; University of Toronto, Department of Family and Community Medicine<br>Kalia, Sumeet; University of Toronto, Department of Family and Community Medicine<br>Voruganti, R.; University of Toronto, Family and Community Medicine<br>Aliarzadeh, Babak; University of Toronto, Department of Family and Community Medicine<br>Moineddin, Rahim; University of Toronto, Family and Community Medicine; Institute for Clinical Evaluative Sciences,<br>Hinton, William; University of Surrey, Department of Clinical and Experimental Medicine<br>Dawes, Martin; University of British Columbia, Department of Family Practice<br>Sullivan, Frank; University of St. Andrews, ; North York General hospital,<br>Syed, Saddaf; University of Toronto, Department of Family and Community Medicine<br>Williams, John; Surrey University PGMS, Primary Care<br>de Lusignan, Simon; University of Surrey, Department of Clinical and Experimental Medicine |
| Keywords:                     | Hypertension < CARDIOLOGY, Information technology < BIOTECHNOLOGY & BIOINFORMATICS, Ischaemic heart disease < CARDIOLOGY, Quality in health care < HEALTH SERVICES ADMINISTRATION & MANAGEMENT                                                                                                                                                                                                                                                                                                                                                                                                                                                                                                                                                                                                                                                                                                                                                                       |
|                               |                                                                                                                                                                                                                                                                                                                                                                                                                                                                                                                                                                                                                                                                                                                                                                                                                                                                                                                                                                      |

SCHOLARONE™  
Manuscripts

## Authors & Title

### **Trends in systematic recording errors of blood pressure and associations with outcomes in Canadian and UK Primary Care: a retrospective observational study**

Michelle Greiver, MD MSc CCFP FCFP<sup>1,2,3</sup>, Sumeet Kalia MSc<sup>1</sup>, Teja Voruganti PhD<sup>6</sup>, Babak Aliarzadeh MD MPH<sup>1</sup>, Rahim Moineddin PhD<sup>1,5</sup>, William Hinton MSc<sup>7</sup>, Martin Dawes MD<sup>8</sup>, Frank Sullivan FRSE, FRCP, FRCGP, CCFP<sup>4</sup>, Saddaf Syed OCT, PGCE, BSc.<sup>1</sup>, John Williams MSc, MRCP, FFCI, FRCGP<sup>7</sup>, Simon de Lusignan MD, MSc, FBCS, FACHI, FFCI, FRCGP<sup>7</sup>

<sup>1</sup> Department of Family and Community Medicine, Faculty of Medicine, University of Toronto

<sup>2</sup> Department of Family and Community Medicine, North York General Hospital

<sup>3</sup> North York General Hospital

<sup>4</sup> Medical school, University of St Andrews, Scotland

<sup>5</sup> Institute for Clinical Evaluative Sciences

<sup>6</sup> Faculty of Medicine, University of Toronto

<sup>7</sup> University of Surrey

<sup>8</sup> Department of Family Practice, University of British Columbia

#### Corresponding Author:

Michelle Greiver, MSc MD CCFP FCFP  
Acting Director, UTOPIAN Practice Based Research Network  
North York General Hospital, Family and Community Medicine  
4001 Leslie street, LE 140  
Toronto, ON, CAN M2K 1E1  
416-756-6483  
mgreiver@rogers.com

Word Count: 3773

Number of Tables: 6

Number of Figures: 4

## Abstract

**Objectives:** to study systematic errors in recording blood pressure (BP) as measured by end digit preference (EDP); to determine associations between EDP, uptake of Automated Office BP (AOBP) machines and cardiovascular outcomes.

**Design:** Retrospective observational study using routinely collected electronic medical record data from 2006 to 2015 and a survey on year of AOBP acquisition in Toronto, Canada in 2017.

**Setting:** Primary care practices in Canada and the UK

**Participants:** Adults aged 18 years or more.

**Main outcome measures:** Mean rates of EDP and change in rates. Rates of EDP following acquisition of an AOBP machine. Associations between site EDP levels and mean BP. Associations between site EDP levels and frequency of cardiovascular outcomes.

**Results:** 707,227 patients in Canada and 1,558,471 patients in the UK were included. From 2006 to 2015, the mean rate of BP readings with both systolic and diastolic pressure ending in zero decreased from 26.6% to 15.4% in Canada and from 24.2% to 17.3% in the U.K. Systolic BP readings ending in zero decreased from 41.8% to 32.5% in the three years following the purchase of an AOBP machine. Sites with high EDP had a mean systolic BP of 2.0 mmHg in Canada, and 1.7 mmHg in the UK, lower than sites with no or low EDP. Patients in sites with high levels of EDP had a higher frequency of stroke (standardized morbidity ratio SMR 1.15, 95% CI 1.12-1.17), myocardial infarcts (SMR 1.16, 95% CI 1.14-1.19), and angina (SMR 1.25, 95% CI 1.22-1.28) than patients in sites with no or low EDP.

**Conclusions:** Acquisition of an AOBP was associated with a decrease in EDP levels. Sites with higher rates of EDP rounded BP readings down and had a higher frequency of adverse cardiovascular outcomes. The routine use of manual office-based BP measurement should be reconsidered.

### Strengths and limitations of this study

- The study found that the purchase of AOBP machines by primary care offices was followed by more accurate BP measurement
- Offices with less accurate BP measurement (more end digit preference) rounded BP readings down
- These offices also had higher frequencies of adverse cardiovascular outcomes
- The survey of AOBP machine purchase was done only in Ontario; we infer that the purchase of an AOBP machine was associated with less end digit preference elsewhere

## Introduction:

High blood pressure (BP) is a leading cause of increased morbidity and early mortality in adults.<sup>1</sup> BP should be routinely measured as part of clinical encounters.<sup>2</sup> However, there are long standing concerns about the precision and accuracy of BP measurement in practice.<sup>3,4</sup> There is evidence that measuring BP manually, using an aneroid or mercury column sphygmomanometer, is associated with systematic recording errors including end digit preference (EDP) and observer bias.<sup>5</sup> EDP means that the observer rounds off the last digit;<sup>6</sup> for example, BPs end in zero for up to 60% of records instead of the expected 10%.<sup>7,8</sup> Observer bias means that BP is adjusted towards a preferred level (rounding up or rounding down).<sup>8</sup> These issues may lead to errors in the diagnosis and treatment of hypertension.<sup>9</sup>

Automated Office BP (AOBP) measurement uses a machine to record and report the numerical values of systolic and diastolic BPs on a digital display.<sup>10</sup> Three to six recordings are done; the initial reading is discarded and the remaining readings are averaged.<sup>11</sup> Research suggests that EDP is reduced as a result of this method.<sup>9,11</sup> AOBP is comparable to the gold standard of 24-hour automated home BP monitoring.<sup>12</sup> Canadian and European hypertension guidelines now recommend AOBP as the preferred method for office-based measurement of BP,<sup>2,13</sup> but have not made a recommendation to discontinue the routine use of manual BP measurement.

There is evidence that AOBP machines are increasingly used in primary care; it has been reported that more than 10,000 AOBP machines are currently in use in Canada.<sup>11</sup> In a recent Canadian survey, 43% of family physicians reported using AOBP to screen for hypertension.<sup>14</sup> However, the proportion of office BP measurements done using AOBP when machines are available in an office is not known. Changes in the proportion of BPs with EDP could serve as a marker of increasing use of AOBP in primary care practice, though this requires validation.

Accurate measurement is essential for BP control. There is a need to quantify systematic BP measurement errors in primary care, consider these in the context of changing AOBP use and estimate the effects of errors on cardiovascular outcomes affected by BP control.

The objectives of this study were therefore to (1) report the EDP levels with respect to patient and provider-level characteristics, (2) examine the changes in EDP with AOBP uptake in offices, (3) quantify prevalence and trends in systematic recording errors in BP recording and (4) determine associations between EDP and cardiovascular outcomes.

## Methods:

We used a repeated cross-sectional observational design. We applied the STrengthening the Reporting of OBServational studies in Epidemiology (STROBE) checklist for reporting observational studies.<sup>15</sup>

## Settings and Data sources

### Canada

The Canadian Primary Care Sentinel Surveillance Network (CPCSSN) database was used for this study.<sup>16</sup> CPCSSN is Canada's largest EMR-based chronic disease surveillance system<sup>16</sup> and includes data collected from eleven primary care practice based research networks in 8 of Canada's 13 provinces and territories. Consenting family physicians and other primary care providers participating in CPCSSN contribute de-identified EMR data to regional network repositories; patients can opt-out if they choose to do so. Data from all participating networks are collected every six months and aggregated in a single central database.<sup>16</sup> The distribution of the CPCSSN patient population is reasonably similar to that of Canadian census.<sup>17</sup>

We used EMR data extracted and processed using procedures previously described.<sup>16</sup> CPCSSN case definition algorithms have been validated against chart audits for eight chronic conditions (diabetes, hypertension, chronic obstructive pulmonary disease, depression, osteoarthritis, dementia, parkinsonism and epilepsy) in multiple sites across Canada.<sup>18</sup>

### U.K.

We repeated the analyses using the Royal College of General Practitioners Research and Surveillance Centre (RCGP RSC) database for the UK. This is one of Europe's oldest primary care sentinel networks.<sup>6</sup> It has been reported that the RCGP RSC has data of high quality for chronic disease, including diabetes<sup>6</sup> and cardiovascular outcomes.<sup>19</sup>

The RCGP RSC data are extracted weekly from the EMRs of >150 representative general practices (groups of physicians practicing in the same location) in England, covering a population of over 1.5 million patients and 3% of the population. A comparison of RCGP RSC practices with national pay-for-performance data, prescribing data, and the quality and outcomes framework suggests that data are representative of the national population in terms of age and gender of the population, ethnicity and deprivation.<sup>6</sup>

### Study population

We used routinely collected clinical electronic medical record (EMR) data from primary care clinics across Canada and the UK. These data were extracted in Canada as of June 30<sup>th</sup>, 2016 and in the UK as of December 31<sup>st</sup> 2016. We examined BP measurements taken between January 1<sup>st</sup>, 2006 and December 31<sup>st</sup>, 2015 in the CPCSSN database and in the RCGP RSC database. We included all patients who were at least 18 years of age as of BP measurement date. We identified patient characteristics that may influence BP and its measurement. Patient variables included: age; sex; presence of hypertension and/or diabetes; body mass index; use of hypertensive medications. We recorded the total number of patients included for each site; a site was a group of physicians practicing in the same location.

### Statistical Analysis

1  
2  
3  
4 We examined the proportions of BPs ending in each digit in Canada and UK. We used the  
5 entire collection of BP records in both databases to estimate the unadjusted frequency of  
6 last digit zero for both systolic and diastolic BPs with respect to patient, site and temporal  
7 characteristics.  
8  
9

10 Since each patient may have BP recorded multiple times with irregular visit to primary care  
11 between Jan 2006 to Dec 2015, we chose to discard excess information using a sampling  
12 mechanism.<sup>20</sup> We used stratified sampling without replacement to randomly choose one BP  
13 measurement for each patient. The estimates and the confidence intervals of odds ratios  
14 were computed using bootstrap where one thousand independently sampled replicates of  
15 the CPCSSN and RCGP RSC database were generated.<sup>21</sup> All covariates in the regression  
16 model were held constant for each patient with respect to the study follow-up. For  
17 example, the most recent information on BMI or the diagnosis of diabetes or hypertension  
18 medication was used for each patient.  
19  
20  
21

22 To correlate rates of EDP with AOBP uptake, we conducted a subgroup analysis using data  
23 from UTOPIAN, the University of Toronto Practice Based Research Network. UTOPIAN is  
24 the largest network in CPCSSN, with about 25% of data in the national database; it includes  
25 providers and patients from Toronto and surrounding areas in southern Ontario, Canada.  
26 We collected data on AOBP use from UTOPIAN practices using a survey, shown in  
27 supplementary materials. We contacted office representatives through email/phone and  
28 asked them whether there was an AOBP in the office and when it was purchased. Office  
29 representatives were also asked to estimate how often BPs were done with the machine in  
30 the past year.  
31  
32  
33

34 Responses were linked with EMR based blood pressure measurements for each site and the  
35 linked data were used for the subgroup analysis. We examined the association between  
36 length of time the machine was present in the office and the rate of EDP, as well as  
37 association between EDP for 2015 and the self-reported level of use in the past year.  
38  
39

40 We implemented unsupervised cluster analysis to categorize primary care sites into three  
41 groups for each year.<sup>22</sup> The three groups were labeled as: (1) high EDP; (2) medium EDP;  
42 and (3) low or no EDP. Practices were clustered by presence of less commonly recorded  
43 end digits (1,3,7,9) for both sBP and dBP; 40% of BPs would be expected to end in one of  
44 those digits. To control for excessive noise in the data, we chose to exclude the sites with  
45 less than 1000 BP measurements within a year.  
46  
47

48 Since the changes in uncommon end digits (1,3,7,9) may be confounded by the recruitment  
49 of new sites over time or changes in patient populations within sites, the proportion of  
50 recording uncommon digits was reported for each measurement year, giving a rate of EDP  
51 per site per year. The similarity between all pairs belonging to the same cluster was  
52 computed using the Ward score.<sup>23</sup> We examined the mean sBP among patients with and  
53 without hypertension and diabetes using the classification obtained from the cluster  
54 analysis.  
55  
56  
57  
58  
59  
60

1  
2  
3 We estimated the annual frequency of three cardiovascular events (myocardial infarct,  
4 angina, stroke) using UK data; these conditions have not yet been validated in the Canadian  
5 data in CPCSSN. We compared sites with high EDP in each year against sites with low or no  
6 EDP for the same year. The denominator was defined as the total number of patients who  
7 had at least one blood pressure recorded within each year of interest for each group. The  
8 numerator was defined as the total number of patients included in the denominator with a  
9 cardiovascular event within the same year. Patients with a cardiovascular event were  
10 censored in subsequent years. We estimated the standardized morbidity ratio for each  
11 condition in groups with high EDP compared to groups with low or no EDP.  
12  
13

14  
15 This study was reviewed and approved by the Research Ethics Board (REB) at the  
16 University of Toronto; the survey was reviewed and approved by REBs at each  
17 participating site. REB approval was not deemed to be necessary for the UK, as no patients  
18 were identified; this was classified as a service evaluation. The study received a favorable  
19 opinion from the RCGP RSC study review panel. CPCSSN has received REB approval from  
20 Health Canada, and each host university for all participating practice-based research  
21 networks. All participating primary care providers have provided written informed  
22 consent for the collection and analysis of their EMR data. All statistical analyses were  
23 conducted using SAS software, version 9.4 M4 (SAS Institute).  
24  
25

26  
27 No patients were involved in setting the research question or the outcome measures, nor  
28 were they involved in developing plans for design or implementation of the study. We  
29 received input into the study from Patient and Public representatives who commented on  
30 the relevance of the question and the potential impact of the research on outcomes.  
31  
32

### 33 **Results:**

34  
35  
36 Data from 181 sites and 707,227 patients in CPCSSN were included; there were 5.5 million  
37 BP records. Data from 164 sites and 1,558,471 patients in the RCGP RSC database were  
38 included; there were 13.4 million BP records. Each patient was counted once, regardless of  
39 the number of BPs and number of years in which they had a BP recorded. The most  
40 frequently recorded end digit was zero while the least frequent end digits were one, three,  
41 seven and nine (Table 1, Figure 1).  
42  
43

44  
45 Patient and site characteristics and trends in levels of EDP are shown in table 2. The  
46 frequency of last digit zero for both systolic and diastolic BP decreased by 11.2% in Canada  
47 and by 6.9% in the UK from 2006 to 2015. Table 3 describes the adjusted odds ratios (ORs)  
48 of recording zero as the last digit of systolic BP. The ORs of last digit zero were greater  
49 among female patients (CPCSSN: OR=1.10, 95% CI 1.09-1.11; RCGP: OR=1.16, 95% CI 1.15-  
50 1.16). Patients with hypertension were less likely to have EDP than patients without  
51 hypertension (CPCSSN: OR=0.89, 95% CI 0.88-0.91; RCGP RSC: OR=0.79, 95% CI 0.78-0.80).  
52 Patients with diabetes were less likely to have EDP in Canada (OR=0.98 95% CI: 0.96-0.99)  
53 but were more likely to have this in the UK (OR=1.025 95% CI:1.01-1.04). ORs of EDP  
54 decreased as BMI levels increased in Canada but not in the UK.  
55  
56  
57  
58  
59  
60



65 UTOPIAN sites were surveyed; 55 (85%) responded. 93% of the UTOPIAN sites reported having at least one AOBP machine in the practice; most were bought between 2007 and 2014. Even when AOBP machines were present, most offices reported still using manual measurement. There was a reduction of 9.3% (from 41.7% to 32.5%) in the proportion of systolic BPs ending in zero within three years of adopting the AOBP machines (95% CI: -8.9% to -9.8%). Family practices who reported rarely or never using AOBP machines had higher end digit preference than those reporting at least some use of AOBP (Figure 2).

As illustrated in Figure 3, cluster analyses were used to find the optimal decision boundaries to classify sites into high EDP, medium EDP, low or no EDP for Canada and UK. Table 4 provides the number and percentage of sites in each group. In 2006 there was only one Canadian site (3.6%) with low or no EDP while in the UK, 61 sites (38.4%) were in this group. Sites exhibiting high EDP decreased by 47.7% in Canada and by 15.1% in the UK from 2006 to 2015. In contrast, the proportion of sites classified as having low or no EDP increased by 22.9% in Canada and 12.8% in the UK.

The mean systolic BP by EDP group is shown on Table 5. Sites with low or no EDP had a higher mean systolic BP than sites with high EDP (1.97mmHg in Canada; 1.76mmHg in UK). When stratified by presence or absence of hypertension or diabetes, the direction was similar with differences ranging from 0.9 to 2.4 mm Hg.

As shown in figure 4, we observed a higher mean frequency of myocardial infarct (0.40%, 95% CI 0.39 to 0.41), stroke (0.64%, 95% CI 0.63 to 0.65) and angina (0.42%, 95% CI 0.41 to 0.43) in sites with high EDP as compared to sites with low or no EDP: 0.34% (95% CI 0.33 to 0.35), 0.56% (95% CI 0.55 to 0.57) and 0.33% (95% CI 0.32 to 0.34) respectively. Table 6 provides the standardized morbidity ratio; this was higher for all three conditions for sites with high EDP compared to sites with low or no EDP.

## Discussion:

We found significant levels of systematic recording errors in BP measurement in the UK and Canada; these decreased over time. There was an association between the length of time an AOBP machine was present in an office and a decrease in EDP. Higher rates of EDP, and presumably more use of manual BP recording in those sites, appeared to be associated with rounding down of BPs and a higher frequency of adverse cardiovascular outcomes.

Our study found decreasing rates of in EDP; there have been increasingly strong guideline recommendations to switch to AOBP.<sup>2,24</sup> While a recent survey found that almost half of Canadian physicians reported using AOBP to screen for hypertension,<sup>14</sup> most offices in this study reported continued use of manual BP measurement for some patients even when an AOBP machine was present in the office. We found a gradual decrease in EDP associated with the length of time that AOBP has been present in the office, indicating that physicians and sites may be increasingly accustomed to its routine use for measurement.

1  
2  
3 European Guidelines recommending adoption of AOBP were associated with a large  
4 decrease in recorded blood pressures ending in zero in the U.K., from 71.2% in 1996-1997  
5 to 36.7% in 2005-2006.<sup>25</sup> UK studies based on the Quality Improvement in Chronic Kidney  
6 Disease (QICKD) trial<sup>26</sup> have shown reductions over time, presumably related to the  
7 progressive introduction of AOBP – though this assumption was not validated.<sup>27</sup> In  
8 addition, there were changes in the patterns of recording odd vs. even terminal digits.  
9 Another study in China also noted decreases in EDP over time.<sup>28</sup> Implementation of AOBP  
10 in offices thus appears to be correlated with decreases in EDP.<sup>3,7,25</sup>  
11  
12

13  
14 The use of AOBP measurement resulted in lower readings than manual BP measurement  
15 (by 5 to 10 mmg Hg) in a randomized controlled trial (RCT); AOBP readings agreed more  
16 closely with the gold standard of 24 hour BP measurement than manual BP readings.<sup>11</sup> The  
17 introduction of AOBP should therefore be associated with a combination of lower rates of  
18 EDP (greater precision) and lower BP readings that are more consistent with the gold  
19 standard (greater accuracy).  
20

21  
22 We found that sites with low or no EDP (those presumably using AOBP more consistently)  
23 had a mean BP that was close to 2 mm Hg higher than those with greater rates of EDP (and  
24 presumably more use of manual BP in the practice); RCT data had led to an expectation  
25 that this would be about 5 mm Hg lower. Therefore, observer errors associated with  
26 manual BP may have resulted in both rounding towards zero and systematically rounding  
27 down. Rounding down was observed for patients with diabetes and hypertension as well  
28 as for those without these conditions. This could potentially lead to under-diagnosis of  
29 hypertension and under-treatment of diagnosed hypertension.  
30  
31

32  
33 Another observational study had found that higher rates of EDP (and presumably more  
34 manual BPs) were associated with lower mean systolic BP, by 2 to 3 mm Hg.<sup>25</sup> A study in  
35 the UK found that the change from manual to AOBP in primary care practices resulted in  
36 lower rates of EDP but no changes in mean BP.<sup>3</sup>  
37

38  
39 A large cluster RCT (CHAP) documented improved management of hypertension in  
40 communities randomized to the intervention. This consisted of more accurate AOBP-based  
41 measurement in pharmacies with forwarding of abnormal BP results to family physicians.<sup>29</sup>  
42 The CHAP intervention resulted in a significant decrease in hospitalizations due to  
43 cardiovascular disease (myocardial infarction, stroke, heart failure).<sup>29</sup> In that trial, there  
44 was an improvement in BP from a mean of 142 mm Hg to 123 mm Hg when the initial  
45 pharmacy-based reading was elevated.<sup>30</sup> Systematically more accurate measurement of BP  
46 through the use of AOBP in the community, followed by notification of the primary care  
47 provider when BP was elevated, may have resulted in more treatment of elevated BP in  
48 primary care and decreased adverse cardiovascular outcomes.  
49  
50

51  
52 The results in this real world observational study in two countries are plausibly consistent  
53 with those of the CHAP RCT. We found that practices with greater precision for BP  
54 measurement (less EDP) also had a lower prevalence of adverse cardiovascular outcomes  
55 for their patients. It is possible that these practices were using AOBP more often and were  
56 thus measuring BP with greater accuracy. Systematic rounding down associated with  
57  
58  
59

1  
2  
3 higher rates of EDP and presumably greater use of manual BP measurement by practices in  
4 this study appeared to be associated with an elevated frequency of adverse cardiovascular  
5 outcomes.  
6

7  
8 A switch to routine use of AOBP for most office-based BP measurements would require the  
9 purchase of enough machines to support the number of physicians and patients in each  
10 office, training of staff and health care providers, and changes in offices processes to  
11 support more consistent use of AOBP. We are not aware of financial or other practice level  
12 incentives in either country promoting this change.  
13  
14

## 15 16 **Limitations**

17  
18 The study has several strengths. We used data from routine community-based primary  
19 care. We also included a large sample of both patients and primary care providers from  
20 multiple settings across Canada and the UK, observed over a decade or more. Therefore,  
21 this study reasonably reflects current clinical practices for individuals receiving primary  
22 care in both countries.  
23  
24

25  
26 This study has several shortcomings. This was a convenience sample of primary care  
27 practices that contributed EMR data to CPCSSN and the RCGP RSC. We surveyed practices  
28 for their use of AOBP in one network only (UTOPIAN); the survey was done at the office  
29 level rather than by physician. There may be recall bias and the actual proportion of  
30 patients whose BP was measured using an AOBP is unknown.  
31

32  
33 There may be unmeasured confounders associated with both higher incidence of  
34 cardiovascular outcomes and greater rates of EDP. Nonetheless, the differences between  
35 groups persisted as practices switched to lower rates of EDP over time and there is no a  
36 priori reason to expect a change in unmeasured confounders in practices switching to  
37 AOBP and lower rates of EDP.  
38

39  
40 We did not examine whether there was any repeated measurement bias or recording bias  
41 in AOBP practices.  
42

## 43 **Conclusions**

44  
45 In conclusion, systematic measurement errors including rounding down are associated  
46 with higher rates of EDP. It is likely that this is associated with more manual BP  
47 measurement in these primary care practices and in turn is correlated with a higher risk of  
48 adverse cardiovascular outcomes at a population level. Our findings suggest that the  
49 continued routine use of manual measurement of BP in primary care offices may be  
50 problematic. We recommend the use of AOBP as the standard of care for measuring and  
51 monitoring BP in medical offices.  
52  
53

## 54 **Acknowledgements:**

1  
2  
3 The Canadian Primary Care Sentinel Surveillance Network was a committee of the College  
4 of Family Physicians of Canada and was funded through a contribution agreement with the  
5 Public Health Agency of Canada. The views expressed herein do not necessarily represent  
6 the views of the Public Health Agency of Canada. This study received funding through a  
7 grant by the North York General Hospital Foundation's Exploration Fund. Dr Greiver holds  
8 an investigator award from the Department of Family and Community Medicine, University  
9 of Toronto and was supported by a research stipend from North York General Hospital.  
10 None of the funding sources had any role in the writing of the manuscript or the decision to  
11 submit it for publication. None of the authors received payment to write this article by a  
12 pharmaceutical company or other agency.  
13  
14  
15

16 The authors have no competing interests to declare.  
17

18 We are grateful to the physicians and patients who allow data sharing for the Royal College  
19 of General Practitioners (RCGP) Research and Surveillance Centre (RSC), for UTOPIAN and  
20 for other networks participating in CPCSSN. We also wish to thank EMIS, In Practice  
21 Systems, TPP SystemOne and other computerized medical record system vendors who  
22 collaborate with RCGP RSC to facilitate data extraction, and Apollo Medical Systems for  
23 data extraction in the UK. The principal funding of RCGP RSC is Public Health England, for  
24 its work as a surveillance system.  
25  
26  
27

28 MG, FS, SK SdeL contributed to conception and design. BA was responsible for acquisition  
29 of Canadian, and SdeL for UK data. SK, RM and WH contributed substantially to the analysis  
30 of data. MG and SK with input from SdeL drafted the initial version of the article. All authors  
31 contributed to the interpretation of data. All authors reviewed and revised the article for  
32 important intellectual content and gave final approval of the version to be published. MG is  
33 the guarantor of this work, with SdeL for the RCGP RSC data, and, as such, had full access to  
34 all the data in the study and takes responsibility for the integrity of the data and the  
35 accuracy of the data analysis. MG had final responsibility for the decision to submit for  
36 publication.  
37  
38  
39

40 Data are from a nationally representative Canadian repository of primary care EMR data,  
41 the Canadian Primary Care Sentinel Surveillance Network (<http://cpcssn.ca>). CPCSSN data  
42 are available to researchers as outlined in the process available on the website, [cpcssn.ca](http://cpcssn.ca) .  
43 Similarly, the Royal College of General Practitioners (RCGP) Research and Surveillance  
44 Centre (RSC) network database can be accessed by researchers following the process set  
45 out at: [www.rcgp.org.uk/rsc](http://www.rcgp.org.uk/rsc). Extra data is available by emailing  
46 [michelle.greiver@nygh.on.ca](mailto:michelle.greiver@nygh.on.ca).  
47  
48  
49  
50  
51  
52  
53  
54  
55  
56  
57  
58  
59  
60

**Table 1: Frequency of end-digits for systolic and diastolic blood pressures**

| End-digits | Canada      |              | UK          |              |
|------------|-------------|--------------|-------------|--------------|
|            | Systolic BP | Diastolic BP | Systolic BP | Diastolic BP |
| <b>0</b>   | 32.4%       | 35.9%        | 33.8%       | 34.0%        |
| <b>1</b>   | 3.6%        | 3.7%         | 4.5%        | 4.5%         |
| <b>2</b>   | 13.1%       | 10.9%        | 10.3%       | 9.6%         |
| <b>3</b>   | 3.8%        | 3.8%         | 4.8%        | 4.7%         |
| <b>4</b>   | 10.4%       | 10.0%        | 9.1%        | 9.3%         |
| <b>5</b>   | 7.2%        | 6.8%         | 8.3%        | 8.2%         |
| <b>6</b>   | 9.3%        | 8.9%         | 8.5%        | 8.4%         |
| <b>7</b>   | 3.9%        | 3.8%         | 4.9%        | 4.8%         |
| <b>8</b>   | 12.6%       | 12.4%        | 11.2%       | 11.6%        |
| <b>9</b>   | 3.8%        | 3.4%         | 4.8%        | 4.9%         |

**Table 2: Patient/site characteristics and blood pressure measurements ending in zero for both systolic BP and diastolic BP in Canada (CPCSSN) and the UK (RCGP RSC database)**

| Characteristics                      | Canada                             |                                      |                                                                                               | UK                                 |                                      |                                                                                               |
|--------------------------------------|------------------------------------|--------------------------------------|-----------------------------------------------------------------------------------------------|------------------------------------|--------------------------------------|-----------------------------------------------------------------------------------------------|
|                                      | Number of Patients (% of patients) | Number of Blood Pressures (% of BPs) | Number of BPs with both systolic and diastolic BP ending in zero (% with both ending in zero) | Number of Patients (% of patients) | Number of Blood Pressures (% of BPs) | Number of BPs with both systolic and diastolic BP ending in zero (% with both ending in zero) |
| <b>Total</b>                         | 707,227                            | 5,503,663                            | 1,044,031 (19.0%)                                                                             | 1,558,471                          | 13,424,678                           | 2,674,497 (19.9%)                                                                             |
| <b>Age in years</b>                  |                                    |                                      |                                                                                               |                                    |                                      |                                                                                               |
| <b>18 to 39</b>                      | 189,254 (26.8%)                    | 816,136 (14.8%)                      | 165,025 (20.2%)                                                                               | 531,632 (34.1%)                    | 2,330,344 (17.4%)                    | 538,786(23.1%)                                                                                |
| <b>40 to 59</b>                      | 247,771 (35%)                      | 1,534,126 (27.9%)                    | 292,435 (19.1%)                                                                               | 498,272 (32.0%)                    | 3,298,174 (24.6%)                    | 631,260(19.1%)                                                                                |
| <b>60 to 79</b>                      | 201,364 (28.5%)                    | 2,115,655 (38.4%)                    | 377,724 (17.9%)                                                                               | 352,483 (22.6%)                    | 4,879,583 (36.3%)                    | 868,894(17.8%)                                                                                |
| <b>80+</b>                           | 68,838 (9.7%)                      | 1,037,716 (18.9%)                    | 208,847 (20.1%)                                                                               | 176,084 (11.3%)                    | 2,916,577 (21.7%)                    | 635,557(21.8%)                                                                                |
| <b>Sex</b>                           |                                    |                                      |                                                                                               |                                    |                                      |                                                                                               |
| <b>Female</b>                        | 414,644 (58.6%)                    | 3,325,256 (60.4%)                    | 648,357 (19.5%)                                                                               | 901,866 (57.9%)                    | 8,133,678 (60.6%)                    | 1,708,742(21.0%)                                                                              |
| <b>Male</b>                          | 292,583 (41.4%)                    | 2,178,377 (39.6%)                    | 395,674 (18.2%)                                                                               | 656,605 (42.13%)                   | 5,291,000 (39.4%)                    | 965,755(18.3%)                                                                                |
| <b>BMI range</b>                     |                                    |                                      |                                                                                               |                                    |                                      |                                                                                               |
| <b>Underweight (BMI &lt;18.5)</b>    | 10,233 (1.4%)                      | 70,776 (1.3%)                        | 14,649 (20.7%)                                                                                | 44,654 (2.9%)                      | 308,481 (2.3%)                       | 71,234(23.1%)                                                                                 |
| <b>Normal weight (18.5 to 24.9)</b>  | 170,684 (24.1%)                    | 1,177,970 (21.4%)                    | 236,883 (20.1%)                                                                               | 560,214 (36.0%)                    | 4,071,114 (30.3%)                    | 852,192(20.9%)                                                                                |
| <b>Overweight (25 to 29.9)</b>       | 182,141 (25.8%)                    | 1,545,777 (28.1%)                    | 283,163 (18.3%)                                                                               | 446,850(28.7%)                     | 4,412,326 (32.9%)                    | 842,338(19.1%)                                                                                |
| <b>Obesity class I (30 to 34.9)</b>  | 101,980 (14.4%)                    | 1,013,286 (18.4%)                    | 175,781 (17.3%)                                                                               | 200,761 (12.9%)                    | 2,421,241 (18.0%)                    | 455,572(18.8%)                                                                                |
| <b>Obesity class II (35 to 39.9)</b> | 42,235 (6.0%)                      | 468,239 (8.5%)                       | 77,408 (16.5%)                                                                                | 71,450 (4.6%)                      | 928,259 (6.9%)                       | 176,969(19.1%)                                                                                |
| <b>Obesity class III (≥40)</b>       | 27,451 (3.9%)                      | 320,682 (5.8%)                       | 52,327 (16.3%)                                                                                | 37,370 (2.4%)                      | 491,533 (3.7%)                       | 96,589(19.7%)                                                                                 |
| <b>Not available</b>                 | 172,503 (24.4%)                    | 906,903 (16.5%)                      | 203,820 (22.5%)                                                                               | 197,172 (12.7%)                    | 791,724 (5.9%)                       | 179,603(22.7%)                                                                                |
| <b>Diabetes</b>                      |                                    |                                      |                                                                                               |                                    |                                      |                                                                                               |
| <b>Yes</b>                           | 86,103 (12.2%)                     | 1,299,693 (23.6%)                    | 233,944 (18%)                                                                                 | 65,335(4.2%)                       | 1,909,804 (14.2%)                    | 359,324(18.8%)                                                                                |

|                                     |                 |                   |                 |                   |                    |                  |
|-------------------------------------|-----------------|-------------------|-----------------|-------------------|--------------------|------------------|
| <b>No</b>                           | 621,124 (87.8%) | 4,203,940 (76.4%) | 810,087 (19.3%) | 1,493,136 (95.1%) | 11,514,874 (85.8%) | 2,315,173(20.1%) |
| <b>Hypertension</b>                 |                 |                   |                 |                   |                    |                  |
| <b>Yes</b>                          | 185,508 (26.2%) | 2,704,921 (49.1%) | 486,787 (18%)   | 235,716 (15.1%)   | 6,359,131 (47.4%)  | 1,141,665(18.0%) |
| <b>No</b>                           | 521,719 (73.8%) | 2,798,712 (50.9%) | 557,244 (19.9%) | 1,322,755 (84.9%) | 7,065,547 (52.6%)  | 1,532,832(21.7%) |
| <b>Hypertension medications</b>     |                 |                   |                 |                   |                    |                  |
| <b>Yes</b>                          | 125,484 (17.7%) | 2,704,947 (49.1%) | 395,371 (17.7%) | 466,800 (30.0%)   | 8,327,009 (62.0%)  | 1,571,464(18.9%) |
| <b>No</b>                           | 581,743 (82.3%) | 2,798,686 (50.9%) | 648,660 (19.8%) | 1,091,671 (70.1%) | 5,097,669 (38.0%)  | 1,103,033(21.6%) |
| <b>Practice site size</b>           |                 |                   |                 |                   |                    |                  |
| <b>1st quartile (smallest site)</b> | 36,363 (5.1%)   | 249,957 (4.5%)    | 63,781 (25.5%)  | 173610(11.1%)     | 1,671,387 (12.5%)  | 303,084(18.1%)   |
| <b>2nd quartile</b>                 | 77,776 (11%)    | 584,575 (10.6%)   | 110,411 (18.9%) | 305460(19.6%)     | 2836288 (21.1%)    | 480,604(16.9%)   |
| <b>3rd quartile</b>                 | 156,601 (22.1%) | 1,156,892 (21.0%) | 228,521 (19.8%) | 416580(26.7%)     | 3,774,278          | 846,481(22.4%)   |
| <b>4th quartile (largest site)</b>  | 436,487 (61.7%) | 3,512,209 (63.8%) | 641,318 (18.3%) | 662821(42.5%)     | 5,142,725          | 1,044,328(20.3%) |
| <b>Measurement year*</b>            |                 |                   |                 |                   |                    |                  |
| <b>2006</b>                         | 52,168 (7.4%)   | 121,355 (2.2%)    | 32,335 (26.6%)  | 542,695(34.8%)    | 1,347,400 (10.0%)  | 325,843(24.2%)   |
| <b>2007</b>                         | 81,699 (11.6%)  | 183,591 (3.3%)    | 49,030 (26.7%)  | 553,033(35.5%)    | 1,342,979 (10.1%)  | 303,477(22.6%)   |
| <b>2008</b>                         | 125,781(17.8%)  | 277,858 (5.0%)    | 72,772 (26.2%)  | 563,222(36.1%)    | 1,353,092 (10.1%)  | 288,418(21.3%)   |
| <b>2009</b>                         | 167,345(23.7%)  | 368,245 (6.7%)    | 94,871 (25.8%)  | 572,940(36.8%)    | 1,358,664 (10.1%)  | 278,829(20.5%)   |
| <b>2010</b>                         | 213,250(30.2%)  | 531,316 (9.7%)    | 117,612 (22.1%) | 580,069(37.2%)    | 1,340,279 (10.0%)  | 266,242(19.9%)   |
| <b>2011</b>                         | 263,691(37.3%)  | 615,364 (11.2%)   | 125,282 (20.4%) | 590,921(37.9%)    | 1,354,956 (10.1%)  | 257,309(19.0%)   |
| <b>2012</b>                         | 299,590(42.4%)  | 700,903 (12.7%)   | 128,192 (18.3%) | 602,642(38.7%)    | 1,347,042 (10.0%)  | 249,344(18.5%)   |
| <b>2013</b>                         | 332,809(47.1%)  | 813,009 (14.8%)   | 133,434 (16.4%) | 617,073(39.6%)    | 1,366,085 (10.2%)  | 246,754(18.1%)   |
| <b>2014</b>                         | 360,180(50.9%)  | 894,350 (16.3%)   | 137,181 (15.3%) | 612,382(39.3%)    | 1,325,141 (9.9%)   | 235,377(17.8%)   |
| <b>2015</b>                         | 386,541(54.7%)  | 997,642 (18.1%)   | 153,322 (15.4%) | 594,589(38.2%)    | 1,289,040 (9.6%)   | 222,904(17.3%)   |

\*considering repeated measurements of blood pressure for each patient with respect to measurement year.

BMI - body mass index (weight in kg / height in meters<sup>2</sup>)

**Table 3: Adjusted odds ratios of recording zero as the last digit of systolic blood pressure by patient and site characteristics**

| Effect                   | Index Group                       | Reference group             | Canada     |                         |       |         | UK         |                         |       |         |
|--------------------------|-----------------------------------|-----------------------------|------------|-------------------------|-------|---------|------------|-------------------------|-------|---------|
|                          |                                   |                             | Odds ratio | 95% confidence interval |       | P-value | Odds ratio | 95% confidence interval |       | P-value |
| Age                      | 18 to 39                          | 80+                         | 1.088      | 1.063                   | 1.112 | <0.001  | 0.784      | 0.773                   | 0.795 | <0.001  |
|                          | 40 to 59                          | 80+                         | 1.012      | 0.990                   | 1.034 | 0.294   | 0.788      | 0.777                   | 0.798 | <0.001  |
|                          | 60 to 79                          | 80+                         | 0.942      | 0.923                   | 0.963 | <0.001  | 0.783      | 0.772                   | 0.794 | <0.001  |
| Sex                      | Female                            | Male                        | 1.100      | 1.089                   | 1.112 | <0.001  | 1.156      | 1.148                   | 1.163 | <0.001  |
| BMI                      | Underweight (BMI <18.5)           | Obesity class III (BMI ≥40) | 1.316      | 1.267                   | 1.366 | <0.001  | 1.047      | 1.019                   | 1.074 | 0.001   |
|                          | Normal (BMI 18.5 to 24.9)         | Obesity class III           | 1.226      | 1.192                   | 1.258 | <0.001  | 0.960      | 0.939                   | 0.980 | <0.001  |
|                          | Overweight (BMI 25 to 29.9)       | Obesity class III           | 1.135      | 1.104                   | 1.166 | <0.001  | 0.947      | 0.926                   | 0.966 | <0.001  |
|                          | Obesity class I (BMI 30 to 34.9)  | Obesity class III           | 1.065      | 1.036                   | 1.096 | <0.001  | 0.953      | 0.932                   | 0.973 | <0.001  |
|                          | Obesity class II (BMI 35 to 39.9) | Obesity class III           | 1.008      | 0.978                   | 1.040 | 0.618   | 0.967      | 0.943                   | 0.992 | 0.007   |
| Diabetes                 | Yes                               | No                          | 0.982      | 0.964                   | 0.999 | 0.047   | 1.025      | 1.008                   | 1.042 | 0.004   |
| Hypertension             | Yes                               | No                          | 0.892      | 0.877                   | 0.908 | <0.001  | 0.790      | 0.780                   | 0.799 | <0.001  |
| Hypertension medications | Yes                               | No                          | 0.967      | 0.947                   | 0.986 | 0.001   | 1.057      | 1.047                   | 1.068 | <0.001  |
| Practice Site size       | 1st quartile (smallest site)      | 4th quartile (largest site) | 1.950      | 1.908                   | 1.990 | <0.001  | 0.816      | 0.809                   | 0.823 | <0.001  |
|                          | 2nd quartile                      | 4th quartile (largest site) | 1.075      | 1.058                   | 1.094 | <0.001  | 0.893      | 0.885                   | 0.900 | <0.001  |
|                          | 3rd quartile                      | 4th quartile (largest site) | 1.087      | 1.074                   | 1.100 | <0.001  | 0.891      | 0.883                   | 0.899 | <0.001  |
| Measurement year         | 2006                              | 2015                        | 1.910      | 1.833                   | 1.990 | <0.001  | 1.647      | 1.625                   | 1.668 | <0.001  |
|                          | 2007                              | 2015                        | 1.923      | 1.857                   | 1.989 | <0.001  | 1.473      | 1.451                   | 1.494 | <0.001  |
|                          | 2008                              | 2015                        | 1.840      | 1.790                   | 1.895 | <0.001  | 1.376      | 1.357                   | 1.396 | <0.001  |
|                          | 2009                              | 2015                        | 1.858      | 1.815                   | 1.903 | <0.001  | 1.321      | 1.300                   | 1.341 | <0.001  |
|                          | 2010                              | 2015                        | 1.582      | 1.548                   | 1.617 | <0.001  | 1.257      | 1.238                   | 1.275 | <0.001  |
|                          | 2011                              | 2015                        | 1.379      | 1.352                   | 1.407 | <0.001  | 1.178      | 1.161                   | 1.196 | <0.001  |
|                          | 2012                              | 2015                        | 1.239      | 1.216                   | 1.262 | <0.001  | 1.112      | 1.094                   | 1.129 | <0.001  |
|                          | 2013                              | 2015                        | 1.096      | 1.077                   | 1.116 | <0.001  | 1.052      | 1.038                   | 1.067 | <0.001  |
|                          | 2014                              | 2015                        | 1.037      | 1.021                   | 1.052 | <0.001  | 1.016      | 1.000                   | 1.030 | 0.041   |

BMI - body mass index (weight in kg / height in meters<sup>2</sup>)



**Table 4: Number and percentage of sites in each EDP group from 2006 to 2015**

| Year | Canada        |             |            |             |          |             | UK            |             |            |             |          |             |
|------|---------------|-------------|------------|-------------|----------|-------------|---------------|-------------|------------|-------------|----------|-------------|
|      | Low or no EDP |             | Medium EDP |             | High EDP |             | Low or no EDP |             | Medium EDP |             | High EDP |             |
|      | N             | Percent (%) | N          | Percent (%) | N        | Percent (%) | N             | Percent (%) | N          | Percent (%) | N        | Percent (%) |
| 2006 | 1             | 3.6%        | 1          | 3.6%        | 26       | 92.9%       | 61            | 38.4%       | 39         | 24.5%       | 59       | 37.1%       |
| 2007 | 3             | 7.3%        | 3          | 7.3%        | 35       | 85.4%       | 69            | 42.9%       | 41         | 25.5%       | 51       | 31.7%       |
| 2008 | 8             | 13.8%       | 3          | 5.2%        | 47       | 81.0%       | 71            | 44.1%       | 45         | 28.0%       | 45       | 28.0%       |
| 2009 | 8             | 11.1%       | 7          | 9.7%        | 57       | 79.2%       | 74            | 46.0%       | 45         | 28.0%       | 42       | 26.1%       |
| 2010 | 15            | 15.3%       | 11         | 11.2%       | 72       | 73.5%       | 76            | 46.6%       | 45         | 27.6%       | 42       | 25.8%       |
| 2011 | 17            | 15.5%       | 16         | 14.5%       | 77       | 70.0%       | 78            | 47.9%       | 45         | 27.6%       | 40       | 24.5%       |
| 2012 | 27            | 21.8%       | 25         | 20.2%       | 72       | 58.1%       | 82            | 50.3%       | 40         | 24.5%       | 41       | 25.2%       |
| 2013 | 33            | 22.8%       | 33         | 22.8%       | 79       | 54.5%       | 79            | 48.5%       | 48         | 29.4%       | 36       | 22.1%       |
| 2014 | 30            | 20.0%       | 41         | 27.3%       | 79       | 52.7%       | 85            | 52.1%       | 42         | 25.8%       | 36       | 22.1%       |
| 2015 | 41            | 26.5%       | 44         | 28.4%       | 70       | 45.2%       | 84            | 51.2%       | 44         | 26.8%       | 36       | 22.0%       |

EDP – End digit preference

**Table 5: Mean systolic blood pressure by EDP group**

|                         |                      | CPCSSN database (Canada) |                   |           | RCGP RSC database (UK) |                   |           |
|-------------------------|----------------------|--------------------------|-------------------|-----------|------------------------|-------------------|-----------|
|                         |                      | No. of BP measurements   | Mean sBP in mm Hg | Std. Dev. | No. of BP measurements | Mean sBP in mm Hg | Std. Dev. |
| <b>All patients</b>     | <b>Low or no EDP</b> | 1,151,795                | 128.21            | 18.92     | 5,618,800              | 135.05            | 20.09     |
|                         | <b>High EDP</b>      | 2,925,279                | 126.24            | 18.52     | 3,624,391              | 133.29            | 19.63     |
|                         | <b>Difference</b>    |                          | 1.97              |           |                        | 1.76              |           |
| <b>Hypertensive</b>     | <b>Low or no EDP</b> | 584,082                  | 134.59            | 19.29     | 2,687,218              | 142.63            | 19.03     |
|                         | <b>High EDP</b>      | 1,436,251                | 133.51            | 18.36     | 1,715,006              | 141.23            | 18.19     |
|                         | <b>Difference</b>    |                          | 1.08              |           |                        | 1.40              |           |
| <b>Non-hypertensive</b> | <b>Low or no EDP</b> | 567,713                  | 121.65            | 16.09     | 2,931,582              | 128.10            | 18.44     |
|                         | <b>High EDP</b>      | 1,489,028                | 119.23            | 15.77     | 1,909,385              | 126.15            | 18.07     |
|                         | <b>Difference</b>    |                          | 2.42              |           |                        | 1.95              |           |
| <b>Diabetic</b>         | <b>Low or no EDP</b> | 300,630                  | 131.42            | 18.81     | 823,959                | 138.89            | 18.75     |
|                         | <b>High EDP</b>      | 675,920                  | 130.52            | 18.09     | 515,843                | 136.76            | 17.79     |
|                         | <b>Difference</b>    |                          | 0.9               |           |                        | 2.13              |           |
| <b>Non-Diabetic</b>     | <b>Low or no EDP</b> | 851,165                  | 127.08            | 18.83     | 4,794,841              | 134.39            | 20.23     |
|                         | <b>High EDP</b>      | 2,249,359                | 124.96            | 18.46     | 3,108,548              | 132.71            | 19.86     |
|                         | <b>Difference</b>    |                          | 2.12              |           |                        | 1.68              |           |

EDP – End digit preference  
sBP – systolic blood pressure  
Std. Dev – standard deviation  
Std. Dev – standard deviation

**Table 6: Standardized morbidity ratio for groups with high EDP group when compared to groups with low or no EDP**

| Angina                       |          |                       |      |
|------------------------------|----------|-----------------------|------|
| Parameter                    | Estimate | 95% Confidence Limits |      |
| Standardized morbidity ratio | 1.25     | 1.22                  | 1.28 |
| Acute Myocardial infraction  |          |                       |      |
| Standardized morbidity ratio | 1.16     | 1.14                  | 1.19 |
| Stroke                       |          |                       |      |
| Standardized morbidity ratio | 1.15     | 1.12                  | 1.17 |

EDP – End digit preference

**References:**

1. World Health Organization, global health estimates. *Health statistics and information systems* 2016; [http://www.who.int/healthinfo/global\\_burden\\_disease/en/](http://www.who.int/healthinfo/global_burden_disease/en/). Accessed May 29, 2016.
2. Leung AA, Nerenberg K, Daskalopoulou SS, et al. Hypertension Canada's 2016 Canadian Hypertension Education Program Guidelines for Blood Pressure Measurement, Diagnosis, Assessment of Risk, Prevention, and Treatment of Hypertension. *Can J Cardiol*. 2016;32(5):569-588.
3. McManus RJ, Mant J, Hull MR, Hobbs FD. Does changing from mercury to electronic blood pressure measurement influence recorded blood pressure? An observational study. *Br J Gen Pract*. 2003;53(497):953-956.
4. Pickering TG, Hall JE, Appel LJ, et al. Recommendations for blood pressure measurement in humans and experimental animals: Part 1: blood pressure measurement in humans: a statement for professionals from the Subcommittee of Professional and Public Education of the American Heart Association Council on High Blood Pressure Research. *Hypertension*. 2005;45(1):142-161.
5. Beevers G, Lip GY, O'Brien E. ABC of hypertension: Blood pressure measurement. Part II-conventional sphygmomanometry: technique of auscultatory blood pressure measurement. *BMJ*. 2001;322(7293):1043-1047.
6. Correa A, Hinton W, McGovern A, et al. Royal College of General Practitioners Research and Surveillance Centre (RCGP RSC) sentinel network: a cohort profile. *BMJ Open*. 2016;6(4):e011092.
7. Nietert PJ, Wessell AM, Feifer C, Ornstein SM. Effect of terminal digit preference on blood pressure measurement and treatment in primary care. *Am J Hypertens*. 2006;19(2):147-152.
8. de Lusignan S, Belsey J, Hague N, Dzregah B. End-digit preference in blood pressure recordings of patients with ischaemic heart disease in primary care. *J Hum Hypertens*. 2004;18(4):261-265.
9. Myers MG, Godwin M, Dawes M, et al. Conventional versus automated measurement of blood pressure in primary care patients with systolic hypertension: randomised parallel design controlled trial. *BMJ*. 2011;342.
10. Myers MG. Automated blood pressure measurement in routine clinical practice. *Blood Press Monit*. 2006;11(2):59-62.
11. Myers MG, Kaczorowski J, Dawes M, Godwin M. Automated office blood pressure measurement in primary care. *Can Fam Physician*. 2014;60(2):127-132.
12. Myers MG, Valdivieso M, Kiss A. Use of automated office blood pressure measurement to reduce the white coat response. *J Hypertens*. 2009;27(2):280-286.
13. Mancia G, Fagard R, Narkiewicz K, et al. 2013 ESH/ESC Guidelines for the management of arterial hypertension: the Task Force for the management of arterial hypertension of the European Society of Hypertension (ESH) and of the European Society of Cardiology (ESC). *J Hypertens*. 2013;31(7):1281-1357.
14. Kaczorowski J, Myers MG, Gelfer M, et al. How do family physicians measure blood pressure in routine clinical practice? National survey of Canadian family physicians. *Can Fam Physician*. 2017;63(3):e193-e199.

15. von Elm E, Altman DG, Egger M, et al. The Strengthening the Reporting of Observational Studies in Epidemiology (STROBE) Statement: guidelines for reporting observational studies. *Int J Surg*. 2014;12(12):1495-1499.
16. Birtwhistle R, Keshavjee K, Lambert-Lanning A, et al. Building a pan-Canadian primary care sentinel surveillance network: initial development and moving forward. *J Am Board Fam Med*. 2009;22(4):412-422.
17. *Primary health care intelligence: 2013 progress report of the Canadian Primary Care Sentinel Surveillance Network (CPCSSN)*. Kingston, Ontario: Queen's University;2013.
18. Williamson T, Green ME, Birtwhistle R, et al. Validating the 8 CPCSSN Case Definitions for Chronic Disease Surveillance in a Primary Care Database of Electronic Health Records. *The Annals of Family Medicine*. 2014;12(4):367-372.
19. Kumar S, de Lusignan S, McGovern A, et al. Ischaemic stroke, haemorrhage, and mortality in older patients with chronic kidney disease newly started on anticoagulation for atrial fibrillation: a population based study from UK primary care. *Bmj*. 2018;360:k342.
20. Pullenayegum EM. Multiple outputation for the analysis of longitudinal data subject to irregular observation. *Stat Med*. 2016;35(11):1800-1818.
21. Davison A, Hinckley D. *Bootstrap methods and their application, Vol 1*. Cambridge, UK: Cambridge University Press; 1997.
22. James G, Witten D, Hastie T, Tibshirani R. *An Introduction to Statistical Learning - with Applications in R | Gareth James | Springer*. New York: Springer-Verlag New York; 2013.
23. Rencher AC. *Methods of Multivariate Analysis*. John Wiley & Sons; 2003.
24. Campbell NR, Kaczorowski J, Lewanczuk RZ, et al. 2010 Canadian Hypertension Education Program (CHEP) recommendations: the scientific summary - an update of the 2010 theme and the science behind new CHEP recommendations. *Can J Cardiol*. 2010;26(5):236-240.
25. Harrison WN, Lancashire RJ, Marshall TP. Variation in recorded blood pressure terminal digit bias in general practice. *J Hum Hypertens*. 2008;22(3):163-167.
26. de Lusignan S, Gallagher H, Jones S, et al. Audit-based education lowers systolic blood pressure in chronic kidney disease: the Quality Improvement in CKD (QICKD) trial results. *Kidney Int*. 2013;84(3):609-620.
27. Alsanjari ON, de Lusignan S, van Vlymen J, et al. Trends and transient change in end-digit preference in blood pressure recording: studies of sequential and longitudinal collected primary care data. *Int J Clin Pract*. 2012;66(1):37-43.
28. Wang Y, Qain Y, Zhang J, Tang X, Sun J, Zhu D. Longitudinal change in end-digit preference in blood pressure recordings of patients with hypertension in primary care clinics: Minhang study. *Blood Press Monit*. 2015;20(2):74-78.
29. Kaczorowski J, Chambers LW, Dolovich L, et al. Improving cardiovascular health at population level: 39 community cluster randomised trial of Cardiovascular Health Awareness Program (CHAP). *BMJ*. 2011;342.
30. Ye C, Foster G, Kaczorowski J, et al. The impact of a cardiovascular health awareness program (CHAP) on reducing blood pressure: a prospective cohort study. *BMC Public Health*. 2013;13:1230.

**Figure 1: Histogram of systolic and diastolic blood pressure in Canada and the UK**  
**a) Canada: CPCSSN database (2006-2015)**

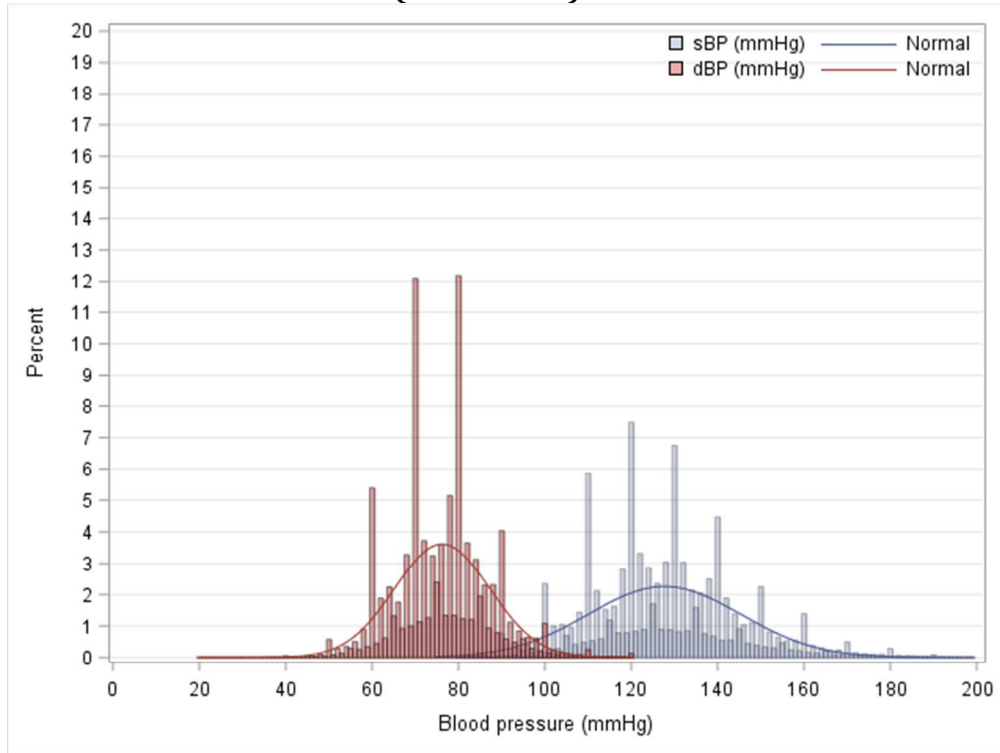

**b) UK: RCGP RSC database (2006-2015)**

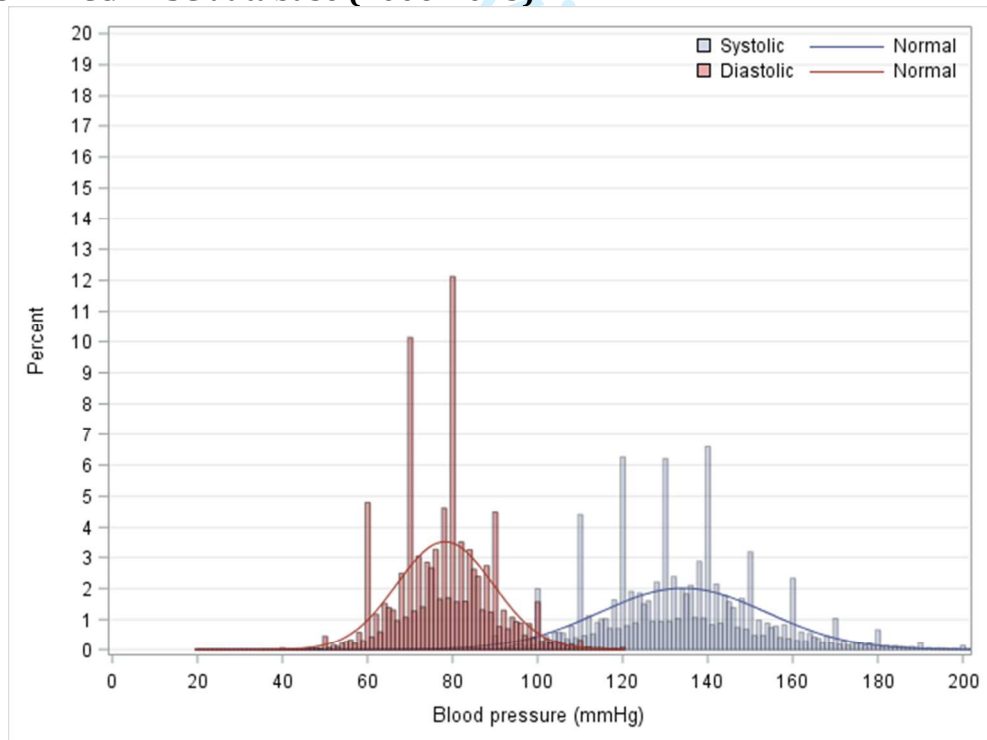

**Figure 2: Impact of adopting automated office blood pressure machines on end digit preference for systolic blood pressure**

**a) Impact with respect to year of purchase of office automated blood pressure machine**

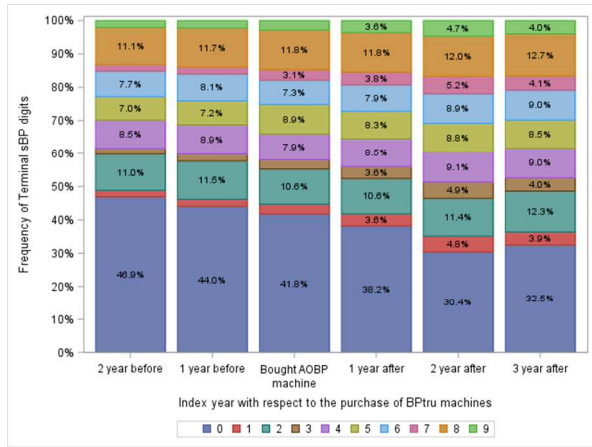

**b) Impact with respect to reported estimate on frequency of use of office automated blood pressure machine**

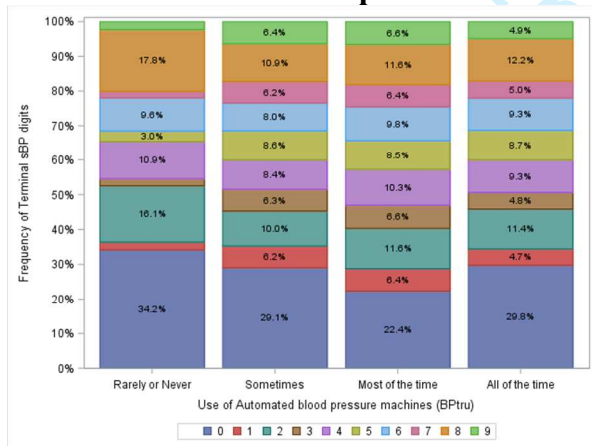

**Figure 3: Proportions of systolic and diastolic BPs ending in 1, 3, 7 or 9 per practice site for each year of interest in Canada and UK from 2006 to 2015**

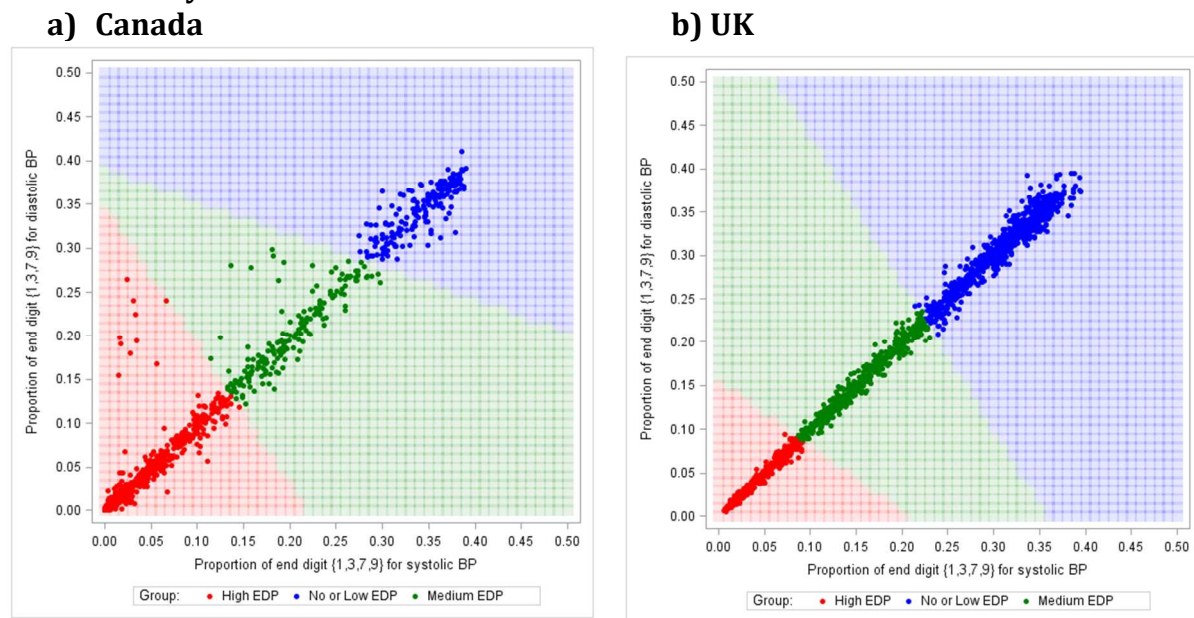

er review only



**Figure 4: Frequency of cardiovascular events in high EDP and no or low EDP group**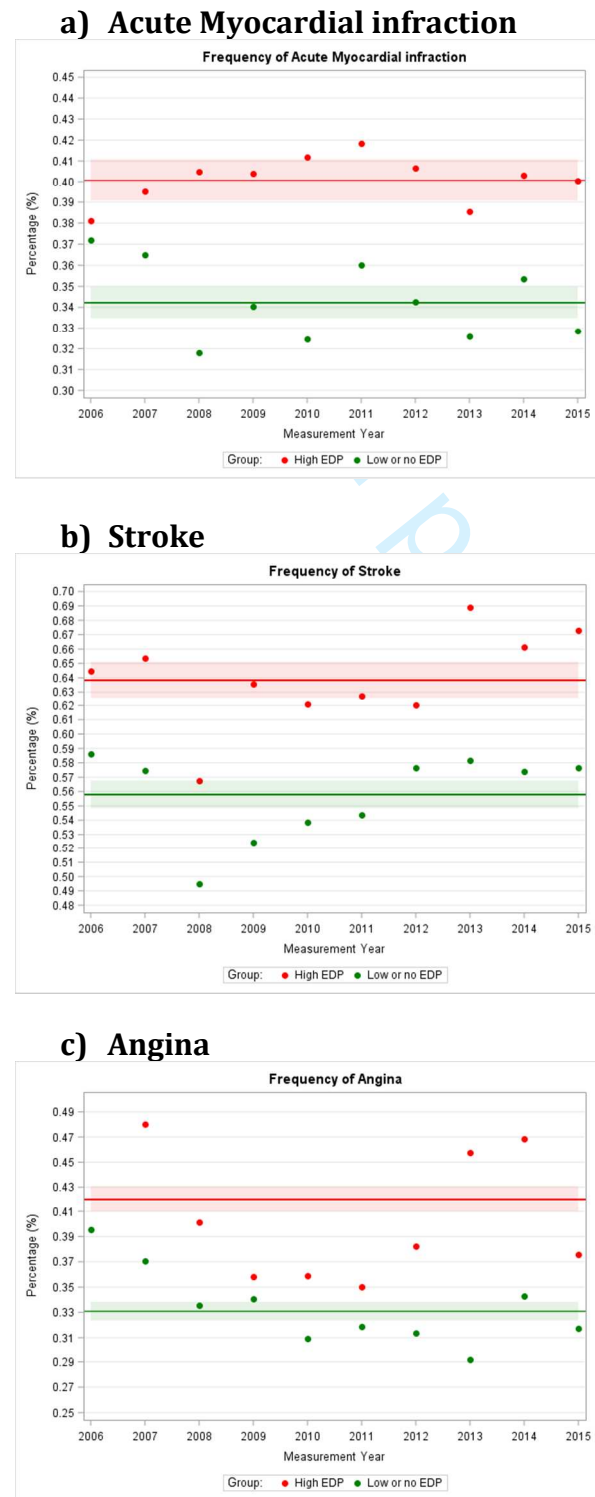

STROBE Statement—Checklist of items that should be included in reports of *cross-sectional studies*

|                              | Item No | Recommendation                                                                                                                                                                                                             |
|------------------------------|---------|----------------------------------------------------------------------------------------------------------------------------------------------------------------------------------------------------------------------------|
| <b>Title and abstract</b>    | 1       | (a) Indicate the study's design with a commonly used term in the title or the abstract:<br><b>Page 1</b>                                                                                                                   |
|                              |         | (b) Provide in the abstract an informative and balanced summary of what was done and what was found: <b>Page 2</b>                                                                                                         |
| <b>Introduction</b>          |         |                                                                                                                                                                                                                            |
| Background/rationale         | 2       | Explain the scientific background and rationale for the investigation being reported<br><b>Page 3-4</b>                                                                                                                    |
| Objectives                   | 3       | State specific objectives, including any prespecified hypotheses <b>Page 3</b>                                                                                                                                             |
| <b>Methods</b>               |         |                                                                                                                                                                                                                            |
| Study design                 | 4       | Present key elements of study design early in the paper <b>Page 3</b>                                                                                                                                                      |
| Setting                      | 5       | Describe the setting, locations, and relevant dates, including periods of recruitment, exposure, follow-up, and data collection <b>Page 4-5</b>                                                                            |
| Participants                 | 6       | (a) Give the eligibility criteria, and the sources and methods of selection of participants <b>Page 4</b>                                                                                                                  |
| Variables                    | 7       | Clearly define all outcomes, exposures, predictors, potential confounders, and effect modifiers. Give diagnostic criteria, if applicable <b>Page 4</b>                                                                     |
| Data sources/<br>measurement | 8*      | For each variable of interest, give sources of data and details of methods of assessment (measurement). Describe comparability of assessment methods if there is more than one group <b>Page 5-6</b>                       |
| Bias                         | 9       | Describe any efforts to address potential sources of bias <b>N/A</b>                                                                                                                                                       |
| Study size                   | 10      | Explain how the study size was arrived at <b>N/A</b>                                                                                                                                                                       |
| Quantitative variables       | 11      | Explain how quantitative variables were handled in the analyses. If applicable, describe which groupings were chosen and why <b>Page 5-6</b>                                                                               |
| Statistical methods          | 12      | (a) Describe all statistical methods, including those used to control for confounding<br><b>Page 5-6</b>                                                                                                                   |
|                              |         | (b) Describe any methods used to examine subgroups and interactions <b>Page 5-6</b>                                                                                                                                        |
|                              |         | (c) Explain how missing data were addressed <b>N/A</b>                                                                                                                                                                     |
|                              |         | (d) If applicable, describe analytical methods taking account of sampling strategy<br><b>N/A</b>                                                                                                                           |
|                              |         | (e) Describe any sensitivity analyses <b>N/A</b>                                                                                                                                                                           |
| <b>Results</b>               |         |                                                                                                                                                                                                                            |
| Participants                 | 13*     | (a) Report numbers of individuals at each stage of study—eg numbers potentially eligible, examined for eligibility, confirmed eligible, included in the study, completing follow-up, and analysed <b>Page 6</b>            |
|                              |         | (b) Give reasons for non-participation at each stage <b>N/A</b>                                                                                                                                                            |
|                              |         | (c) Consider use of a flow diagram <b>N/A</b>                                                                                                                                                                              |
| Descriptive data             | 14*     | (a) Give characteristics of study participants (eg demographic, clinical, social) and information on exposures and potential confounders <b>Page 6</b>                                                                     |
|                              |         | (b) Indicate number of participants with missing data for each variable of interest<br><b>Page 7</b>                                                                                                                       |
| Outcome data                 | 15*     | Report numbers of outcome events or summary measures <b>Page 7</b>                                                                                                                                                         |
| Main results                 | 16      | (a) Give unadjusted estimates and, if applicable, confounder-adjusted estimates and their precision (eg, 95% confidence interval). Make clear which confounders were adjusted for and why they were included <b>Page 7</b> |

|                          |    |                                                                                                                                                                                            |
|--------------------------|----|--------------------------------------------------------------------------------------------------------------------------------------------------------------------------------------------|
|                          |    | (b) Report category boundaries when continuous variables were categorized <b>Page 7</b>                                                                                                    |
|                          |    | (c) If relevant, consider translating estimates of relative risk into absolute risk for a meaningful time period <b>N/A</b>                                                                |
| Other analyses           | 17 | Report other analyses done—eg analyses of subgroups and interactions, and sensitivity analyses <b>Page 7</b>                                                                               |
| <b>Discussion</b>        |    |                                                                                                                                                                                            |
| Key results              | 18 | Summarise key results with reference to study objectives <b>Page 7</b>                                                                                                                     |
| Limitations              | 19 | Discuss limitations of the study, taking into account sources of potential bias or imprecision. Discuss both direction and magnitude of any potential bias <b>Page 8-9</b>                 |
| Interpretation           | 20 | Give a cautious overall interpretation of results considering objectives, limitations, multiplicity of analyses, results from similar studies, and other relevant evidence <b>Page 7-9</b> |
| Generalisability         | 21 | Discuss the generalisability (external validity) of the study results <b>Page 9</b>                                                                                                        |
| <b>Other information</b> |    |                                                                                                                                                                                            |
| Funding                  | 22 | Give the source of funding and the role of the funders for the present study and, if applicable, for the original study on which the present article is based <b>Page 10</b>               |

\*Give information separately for exposed and unexposed groups.

**Note:** An Explanation and Elaboration article discusses each checklist item and gives methodological background and published examples of transparent reporting. The STROBE checklist is best used in conjunction with this article (freely available on the Web sites of PLoS Medicine at <http://www.plosmedicine.org/>, Annals of Internal Medicine at <http://www.annals.org/>, and Epidemiology at <http://www.epidem.com/>). Information on the STROBE Initiative is available at [www.strobe-statement.org](http://www.strobe-statement.org).

# BMJ Open

## Trends in end digit preference for blood pressure and associations with cardiovascular outcomes in Canadian and UK Primary Care: a retrospective observational study

|                                 |                                                                                                                                                                                                                                                                                                                                                                                                                                                                                                                                                                                                                                                                                                                                                                                                                                                                                                                                                                                                                                         |
|---------------------------------|-----------------------------------------------------------------------------------------------------------------------------------------------------------------------------------------------------------------------------------------------------------------------------------------------------------------------------------------------------------------------------------------------------------------------------------------------------------------------------------------------------------------------------------------------------------------------------------------------------------------------------------------------------------------------------------------------------------------------------------------------------------------------------------------------------------------------------------------------------------------------------------------------------------------------------------------------------------------------------------------------------------------------------------------|
| Journal:                        | <i>BMJ Open</i>                                                                                                                                                                                                                                                                                                                                                                                                                                                                                                                                                                                                                                                                                                                                                                                                                                                                                                                                                                                                                         |
| Manuscript ID                   | bmjopen-2018-024970.R1                                                                                                                                                                                                                                                                                                                                                                                                                                                                                                                                                                                                                                                                                                                                                                                                                                                                                                                                                                                                                  |
| Article Type:                   | Research                                                                                                                                                                                                                                                                                                                                                                                                                                                                                                                                                                                                                                                                                                                                                                                                                                                                                                                                                                                                                                |
| Date Submitted by the Author:   | 10-Oct-2018                                                                                                                                                                                                                                                                                                                                                                                                                                                                                                                                                                                                                                                                                                                                                                                                                                                                                                                                                                                                                             |
| Complete List of Authors:       | Greiver, Michelle; University of Toronto, Department of Family and Community Medicine; North York General Hospital<br>Kalia, Sumeet; University of Toronto, Department of Family and Community Medicine<br>Voruganti, R.; University of Toronto, Family and Community Medicine<br>Aliarzadeh, Babak; University of Toronto, Department of Family and Community Medicine<br>Moineddin, Rahim; University of Toronto, Family and Community Medicine; Institute for Clinical Evaluative Sciences,<br>Hinton, William; University of Surrey, Department of Clinical and Experimental Medicine<br>Dawes, Martin; University of British Columbia, Department of Family Practice<br>Sullivan, Frank; University of St. Andrews, ; North York General hospital,<br><br>Syed, Saddaf; University of Toronto, Department of Family and Community Medicine<br>Williams, John; University of Surrey, Department of Clinical and Experimental Medicine<br>de Lusignan, Simon; University of Surrey, Department of Clinical and Experimental Medicine |
| <b>Primary Subject Heading</b>: | Cardiovascular medicine                                                                                                                                                                                                                                                                                                                                                                                                                                                                                                                                                                                                                                                                                                                                                                                                                                                                                                                                                                                                                 |
| Secondary Subject Heading:      | General practice / Family practice, Health services research, Health informatics                                                                                                                                                                                                                                                                                                                                                                                                                                                                                                                                                                                                                                                                                                                                                                                                                                                                                                                                                        |
| Keywords:                       | Hypertension < CARDIOLOGY, Information technology < BIOTECHNOLOGY & BIOINFORMATICS, Ischaemic heart disease < CARDIOLOGY, Quality in health care < HEALTH SERVICES ADMINISTRATION & MANAGEMENT                                                                                                                                                                                                                                                                                                                                                                                                                                                                                                                                                                                                                                                                                                                                                                                                                                          |
|                                 |                                                                                                                                                                                                                                                                                                                                                                                                                                                                                                                                                                                                                                                                                                                                                                                                                                                                                                                                                                                                                                         |

SCHOLARONE™  
Manuscripts

1  
2  
3  
4  
5  
6  
7  
8  
9  
10  
11  
12  
13  
14  
15  
16  
17  
18  
19  
20  
21  
22  
23  
24  
25  
26  
27  
28  
29  
30  
31  
32  
33  
34  
35  
36  
37  
38  
39  
40  
41  
42  
43  
44  
45  
46  
47  
48  
49  
50  
51  
52  
53  
54  
55  
56  
57  
58  
59  
60

## Authors & Title

### **Trends in end digit preference for blood pressure and associations with cardiovascular outcomes in Canadian and UK Primary Care: a retrospective observational study**

Michelle Greiver, MD MSc CCFP FCFP<sup>1,2,3</sup>, Sumeet Kalia MSc<sup>3</sup>, Teja Voruganti PhD<sup>6</sup>, Babak Aliarzadeh MD MPH<sup>3</sup>, Rahim Moineddin PhD<sup>3,5</sup>, William Hinton MSc<sup>7</sup>, Martin Dawes MD<sup>8</sup>, Frank Sullivan FRSE, FRCP, FRCGP, CCFP<sup>4</sup>, Saddaf Syed OCT, PGCE, BSc.<sup>3</sup>, John Williams MSc, MRCP, FFCI, FRCGP<sup>7</sup>, Simon de Lusignan MD, MSc, FBCS, FACHI, FFCI, FRCGP<sup>7,9</sup>

<sup>1</sup> Department of Family and Community Medicine, North York General Hospital

<sup>2</sup> North York General Hospital

<sup>3</sup> Department of Family and Community Medicine, Faculty of Medicine, University of Toronto

<sup>4</sup> Medical school, University of St Andrews, Scotland

<sup>5</sup> Institute for Clinical Evaluative Sciences

<sup>6</sup> Faculty of Medicine, University of Toronto

<sup>7</sup> University of Surrey, Guildford UK

<sup>8</sup> Department of Family Practice, University of British Columbia

<sup>9</sup> Royal College of General Practice Research and Surveillance Centre, London UK

#### Corresponding Author:

Michelle Greiver, MSc MD CCFP FCFP

Gordon F. Cheesbrough Chair in Family and Community Medicine, North York General Hospital

Director, UTOPIAN Practice Based Research Network

North York General Hospital, Family and Community Medicine

4001 Leslie street, LE 140

Toronto, ON, CAN M2K 1E1

416-756-6483

mgreiver@rogers.com

Word Count: 3891

Number of Tables: 6

Number of Figures: 4

## Abstract

**Objectives:** to study systematic errors in recording blood pressure (BP) as measured by end digit preference (EDP); to determine associations between EDP, uptake of Automated Office BP (AOBP) machines and cardiovascular outcomes.

**Design:** Retrospective observational study using routinely collected electronic medical record data from 2006 to 2015 and a survey on year of AOBP acquisition in Toronto, Canada in 2017.

**Setting:** Primary care practices in Canada and the UK

**Participants:** Adults aged 18 years or more.

**Main outcome measures:** Mean rates of EDP and change in rates. Rates of EDP following acquisition of an AOBP machine. Associations between site EDP levels and mean BP. Associations between site EDP levels and frequency of cardiovascular outcomes.

**Results:** 707,227 patients in Canada and 1,558,471 patients in the UK were included. From 2006 to 2015, the mean rate of BP readings with both systolic and diastolic pressure ending in zero decreased from 26.6% to 15.4% in Canada and from 24.2% to 17.3% in the U.K. Systolic BP readings ending in zero decreased from 41.8% to 32.5% in the three years following the purchase of an AOBP machine. Sites with high EDP had a mean systolic BP of 2.0 mmHg in Canada, and 1.7 mmHg in the UK, lower than sites with no or low EDP. Patients in sites with high levels of EDP had a higher frequency of stroke (standardized morbidity ratio SMR 1.15, 95% CI 1.12-1.17), myocardial infarcts (SMR 1.16, 95% CI 1.14-1.19), and angina (SMR 1.25, 95% CI 1.22-1.28) than patients in sites with no or low EDP.

**Conclusions:** Acquisition of an AOBP was associated with a decrease in EDP levels. Sites with higher rates of EDP rounded BP readings down and had a higher frequency of adverse cardiovascular outcomes. The routine use of manual office-based BP measurement should be reconsidered.

### Strengths and limitations of this study

- The study found that the purchase of AOBP machines by primary care offices was followed by more accurate BP measurement
- Offices with less accurate BP measurement (more end digit preference) rounded BP readings down
- These offices also had higher frequencies of adverse cardiovascular outcomes
- The survey of AOBP machine purchase was done only in Ontario; we infer that the purchase of an AOBP machine was associated with less end digit preference elsewhere

## Introduction:

High blood pressure (BP) is a leading cause of increased morbidity and early mortality in adults.<sup>1</sup> BP should be routinely measured as part of clinical encounters.<sup>2</sup> However, there are long standing concerns about the precision and accuracy of BP measurement in practice.<sup>3,4</sup> There is evidence that measuring BP manually, using an aneroid or mercury column sphygmomanometer, is associated with systematic recording errors including end digit preference (EDP) and observer bias.<sup>5</sup> EDP means that the observer rounds off the last digit;<sup>6</sup> for example, BPs end in zero for up to 60% of records instead of the expected 10%.<sup>7,8</sup> Observer bias means that BP is adjusted towards a preferred level (rounding up or rounding down).<sup>8</sup> These issues may lead to errors in the diagnosis and treatment of hypertension.<sup>9</sup>

Automated Office BP (AOBP) measurement uses a machine to record and report the numerical values of systolic and diastolic BPs on a digital display.<sup>10</sup> Three to six recordings are done; the initial reading is discarded and the remaining readings are averaged.<sup>11</sup> Research suggests that EDP is reduced as a result of this method.<sup>9,11</sup> AOBP is comparable to the gold standard of 24-hour automated home BP monitoring.<sup>12</sup> Canadian and European hypertension guidelines now recommend AOBP as the preferred method for office-based measurement of BP,<sup>2,13</sup> but have not made a recommendation to discontinue the routine use of manual BP measurement.

There is evidence that AOBP machines are increasingly used in primary care; it has been reported that more than 10,000 AOBP machines are currently in use in Canada.<sup>11</sup> In a recent Canadian survey, 43% of family physicians reported using AOBP to screen for hypertension.<sup>14</sup> However, the proportion of office BP measurements done using AOBP when machines are available in an office is not known. Changes in the proportion of BPs with EDP could serve as a marker of increasing use of AOBP in primary care practice, though this requires validation.

Accurate measurement is essential for BP control. There is a need to quantify systematic BP measurement errors in primary care, consider these in the context of changing AOBP use and estimate the effects of errors on cardiovascular outcomes affected by BP control.

The objectives of this study were therefore to (1) report the EDP levels with respect to patient and provider-level characteristics, (2) examine the changes in EDP with AOBP uptake in offices, (3) quantify prevalence and trends in systematic recording errors in BP recording and (4) determine associations between EDP and cardiovascular outcomes.

## Methods:

We used a repeated cross-sectional observational design. We applied the STrengthening the Reporting of OBServational studies in Epidemiology (STROBE) checklist for reporting observational studies.<sup>15</sup>



## Settings and Data sources

### Canada

The Canadian Primary Care Sentinel Surveillance Network (CPCSSN) database was used for this study.<sup>16</sup> CPCSSN is Canada's largest electronic medical record (EMR)-based chronic disease surveillance system<sup>16</sup> and includes data collected from eleven primary care practice based research networks in 8 of Canada's 13 provinces and territories. Consenting family physicians and other primary care providers participating in CPCSSN contribute de-identified EMR data to regional network repositories; patients can opt-out if they choose to do so. Data from all participating networks are collected every six months and aggregated in a single central database.<sup>16</sup> The distribution of the CPCSSN patient population is reasonably similar to that of Canadian census.<sup>17</sup>

We used EMR data extracted and processed using procedures previously described.<sup>16</sup> CPCSSN case definition algorithms have been validated against chart audits for eight chronic conditions (diabetes, hypertension, chronic obstructive pulmonary disease, depression, osteoarthritis, dementia, parkinsonism and epilepsy) in multiple sites across Canada.<sup>18</sup>

### U.K.

We repeated the analyses using the Royal College of General Practitioners Research and Surveillance Centre (RCGP RSC) database for the UK. This is one of Europe's oldest primary care sentinel networks.<sup>6</sup> It has been reported that the RCGP RSC has data of high quality for chronic disease, including diabetes<sup>6</sup> and cardiovascular outcomes.<sup>19</sup>

The RCGP RSC data are extracted weekly from the EMRs of >150 representative general practices (groups of physicians practicing in the same location) in England, covering a population of over 1.5 million patients and 3% of the population. A comparison of RCGP RSC practices with national pay-for-performance data, prescribing data, and the quality and outcomes framework suggests that data are representative of the national population in terms of age and gender of the population, ethnicity and deprivation.<sup>6</sup>

### Study population

We used routinely collected clinical electronic medical record (EMR) data from primary care clinics across Canada and the UK. These data were extracted in Canada as of June 30<sup>th</sup>, 2016 and in the UK as of December 31<sup>st</sup> 2016. We examined BP measurements taken between January 1<sup>st</sup>, 2006 and December 31<sup>st</sup>, 2015 in the CPCSSN database and in the RCGP RSC database. We included all patients who were at least 18 years of age as of BP measurement date. We identified patient characteristics that may influence BP and its measurement. Patient variables included: age; sex; presence of hypertension and/or diabetes; body mass index; use of hypertensive medications. We recorded the total number of patients included for each site; a site was a group of physicians practicing in the same location.

### Statistical Analysis

1  
2  
3  
4 We examined the proportions of BPs ending in each digit in Canada and UK. We used the  
5 entire collection of BP records in both databases to estimate the unadjusted frequency of  
6 last digit zero for both systolic and diastolic BPs with respect to patient, site and temporal  
7 characteristics.  
8  
9

10 Since many patients had BP recorded multiple times with irregular visit to primary care  
11 between Jan 2006 to Dec 2015, we chose to discard excess information using a sampling  
12 mechanism.<sup>20</sup> In particular, we generated 1000 independent replicates using the stratified  
13 sampling without replacement where one BP measurement was randomly chosen for a  
14 given patient. Logistic regression was performed on 1000 independently sampled  
15 replicates of the CPCSSN and RCGP RSC database. The odds ratios were estimated using the  
16 mean and 95% confidence intervals were estimated using the 2.5% and 97.5% percentiles  
17 of one thousand bootstrap estimates.<sup>21</sup> All covariates in the regression model were held  
18 constant to their latest value for each patient with respect to the study follow-up. For  
19 example, the most recent information on BMI or the diagnosis of diabetes or hypertension  
20 medication was used for each patient.  
21  
22  
23

24 To correlate rates of EDP with AOBP uptake, we conducted a subgroup analysis using data  
25 from UTOPIAN, the University of Toronto Practice Based Research Network. UTOPIAN is  
26 the largest network in CPCSSN, with about 25% of data in the national database; it includes  
27 providers and patients from Toronto and surrounding areas in southern Ontario, Canada.  
28 We collected data on AOBP use from UTOPIAN practices using a survey, shown in  
29 supplementary materials. We contacted office representatives through email/phone and  
30 asked them whether there was an AOBP in the office and when it was purchased. Office  
31 representatives were also asked to estimate how often BPs were done with the machine in  
32 the past year.  
33  
34  
35

36 Responses were linked with EMR based blood pressure measurements for each site and the  
37 linked data were used for the subgroup analysis. We examined the association between  
38 length of time the machine was present in the office and the rate of EDP, as well as  
39 association between EDP for 2015 and the self-reported level of use in the past year.  
40  
41

42 We implemented unsupervised cluster analysis to categorize primary care sites into three  
43 groups for each year.<sup>22</sup> The three groups were labeled as: (1) high EDP; (2) medium EDP;  
44 and (3) low or no EDP. Practices were clustered by presence of less commonly recorded  
45 end digits (1,3,7,9) for both sBP and dBP; 40% of BPs would be expected to end in one of  
46 those digits. To control for excessive noise in the data, we chose to exclude the sites with  
47 less than 1000 BP measurements within a year.  
48  
49

50 Since the changes in uncommon end digits (1,3,7,9) may be confounded by the recruitment  
51 of new sites over time or changes in patient populations within sites, the proportion of  
52 recording uncommon digits was reported for each measurement year, giving a rate of EDP  
53 per site per year. The similarity between all pairs belonging to the same cluster was  
54 computed using the Ward score.<sup>23</sup> We examined the mean sBP among patients with and  
55  
56  
57

1  
2  
3 without hypertension and diabetes using the classification obtained from the cluster  
4 analysis.  
5

6  
7 We estimated the annual frequency of three cardiovascular events (myocardial infarct,  
8 angina, stroke) using UK data; these conditions have not yet been validated in the Canadian  
9 data in CPCSSN. We compared sites with high EDP in each year against sites with low or no  
10 EDP for the same year. The denominator was defined as the total number of patients who  
11 had at least one blood pressure recorded within each year of interest for each group. The  
12 numerator was defined as the total number of patients included in the denominator with a  
13 cardiovascular event within the same year. Patients with a cardiovascular event were  
14 censored in subsequent years. We estimated the standardized morbidity ratio for each  
15 condition in groups with high EDP compared to groups with low or no EDP.  
16  
17

18  
19 This study was reviewed and approved by the Research Ethics Board (REB) at the  
20 University of Toronto; the survey was reviewed and approved by REBs at each  
21 participating site. REB approval was not deemed to be necessary for the UK, as no patients  
22 were identified; this was classified as a service evaluation. The study received a favorable  
23 opinion from the RCGP RSC study review panel. CPCSSN has received REB approval from  
24 Health Canada, and each host university for all participating practice-based research  
25 networks. All participating primary care providers have provided written informed  
26 consent for the collection and analysis of their EMR data. All statistical analyses were  
27 conducted using SAS software, version 9.4 M4 (SAS Institute).  
28  
29

### 30 **Patient and public involvement**

31  
32 No patients were involved in setting the research question or the outcome measures, nor  
33 were they involved in developing plans for design or implementation of the study. We  
34 received input into the study from Patient and Public representatives who commented on  
35 the relevance of the question and the potential impact of the research on outcomes.  
36  
37

### 38 **Results:**

39  
40  
41 Data from 181 sites and 707,227 patients in CPCSSN were included; there were 5.5 million  
42 BP records. Data from 164 sites and 1,558,471 patients in the RCGP RSC database were  
43 included; there were 13.4 million BP records. Each patient was counted once, regardless of  
44 the number of BPs and number of years in which they had a BP recorded. The most  
45 frequently recorded end digit was zero while the least frequent end digits were one, three,  
46 seven and nine (Table 1, Figure 1).  
47  
48  
49

50  
51 Patient and site characteristics and trends in levels of EDP are shown in table 2. The  
52 frequency of last digit zero for both systolic and diastolic BP decreased by 11.2% in Canada  
53 and by 6.9% in the UK from 2006 to 2015. Table 3 describes the adjusted odds ratios (ORs)  
54 of recording zero as the last digit of systolic BP. The ORs of last digit zero were greater  
55 among female patients (CPCSSN: OR=1.10, 95% CI 1.09-1.11; RCGP: OR=1.16, 95% CI 1.15-  
56 1.16). Patients with hypertension were less likely to have EDP than patients without  
57  
58  
59

hypertension (CPCSSN: OR=0.89, 95% CI 0.88-0.91; RCGP RSC: OR=0.79, 95% CI 0.78-0.80). Patients with diabetes were less likely to have EDP in Canada (OR=0.98 95% CI: 0.96-0.99) but were more likely to have this in the UK (OR=1.025 95% CI:1.01-1.04). ORs of EDP decreased as BMI levels increased in Canada but not in the UK.

65 UTOPIAN sites were surveyed; 55 (85%) responded. 93% of the UTOPIAN sites reported having at least one AOBP machine in the practice; most were bought between 2007 and 2014. Even when AOBP machines were present, most offices reported still using manual measurement. There was a reduction of 9.3% (from 41.7% to 32.5%) in the proportion of systolic BPs ending in zero within three years of adopting the AOBP machines (95% CI: -8.9% to -9.8%). Family practices who reported rarely or never using AOBP machines had higher end digit preference than those reporting at least some use of AOBP (Figure 2).

As illustrated in Figure 3, cluster analyses were used to find the optimal decision boundaries to classify sites into high EDP, medium EDP, low or no EDP for Canada and UK. Table 4 provides the number and percentage of sites in each group. In 2006 there was only one Canadian site (3.6%) with low or no EDP while in the UK, 61 sites (38.4%) were in this group. Sites exhibiting high EDP decreased by 47.7% in Canada and by 15.1% in the UK from 2006 to 2015. In contrast, the proportion of sites classified as having low or no EDP increased by 22.9% in Canada and 12.8% in the UK.

The mean systolic BP by EDP group is shown on Table 5. Sites with low or no EDP had a higher mean systolic BP than sites with high EDP (1.97mmHg in Canada; 1.76mmHg in UK). When stratified by presence or absence of hypertension or diabetes, the direction was similar with differences ranging from 0.9 to 2.4 mm Hg.

As shown in figure 4, we observed a higher mean frequency of myocardial infarct (0.40%, 95% CI 0.39 to 0.41), stroke (0.64%, 95% CI 0.63 to 0.65) and angina (0.42%, 95% CI 0.41 to 0.43) in sites with high EDP as compared to sites with low or no EDP: 0.34% (95% CI 0.33 to 0.35), 0.56% (95% CI 0.55 to 0.57) and 0.33% (95% CI 0.32 to 0.34) respectively. Table 6 provides the standardized morbidity ratio; this was higher for all three conditions for sites with high EDP compared to sites with low or no EDP.

## Discussion:

We found significant levels of systematic recording errors in BP measurement in the UK and Canada; these decreased over time. There was an association between the length of time an AOBP machine was present in an office and a decrease in EDP. Higher rates of EDP, and presumably more use of manual BP recording in those sites, appeared to be associated with rounding down of BPs and a higher frequency of adverse cardiovascular outcomes.

Our study found decreasing rates of in EDP; there have been increasingly strong guideline recommendations to switch to AOBP.<sup>2,24</sup> While a recent survey found that almost half of Canadian physicians reported using AOBP to screen for hypertension,<sup>14</sup> most offices in this study reported continued use of manual BP measurement for some patients even when an

1  
2  
3 AOBP machine was present in the office. We found a gradual decrease in EDP associated  
4 with the length of time that AOBP has been present in the office, indicating that physicians  
5 and sites may be increasingly accustomed to its routine use for measurement.  
6  
7

8 European Guidelines recommending adoption of AOBP were associated with a large  
9 decrease in recorded blood pressures ending in zero in the U.K., from 71.2% in 1996-1997  
10 to 36.7% in 2005-2006.<sup>25</sup> UK studies based on the Quality Improvement in Chronic Kidney  
11 Disease (QICKD) trial<sup>26</sup> have shown reductions over time, presumably related to the  
12 progressive introduction of AOBP – though this assumption was not validated.<sup>27</sup> In  
13 addition, there were changes in the patterns of recording odd vs. even terminal digits.  
14 Another study in China also noted decreases in EDP over time.<sup>28</sup> Implementation of AOBP  
15 in offices thus appears to be correlated with decreases in EDP.<sup>3,7,25</sup>  
16  
17

18 The use of AOBP measurement resulted in lower readings than manual BP measurement  
19 (by 5 to 10 mmg Hg) in a randomized controlled trial (RCT); AOBP readings agreed more  
20 closely with the gold standard of 24 hour BP measurement than manual BP readings.<sup>11</sup> The  
21 introduction of AOBP should therefore be associated with a combination of lower rates of  
22 EDP (greater precision) and lower BP readings that are more consistent with the gold  
23 standard (greater accuracy). An observational study, however, found an association  
24 between higher rates of EDP and lower mean systolic BP, by 2 to 3 mm Hg.<sup>25</sup> A study in the  
25 UK found that the change from manual to AOBP in primary care practices resulted in lower  
26 rates of EDP but no changes in mean BP.<sup>3</sup>  
27  
28  
29

30 We found that sites with low or no EDP (those presumably using AOBP more consistently)  
31 had a mean BP that was close to 2 mm Hg higher than those with greater rates of EDP (and  
32 presumably more use of manual BP in the practice) rather than the expected 5 mm Hg  
33 lower. Therefore, observer errors associated with manual BP may have resulted in both  
34 rounding towards zero and systematically rounding down. Rounding down was observed  
35 for patients with diabetes and hypertension as well as for those without these conditions.  
36 This could potentially lead to under-diagnosis of hypertension and under-treatment of  
37 diagnosed hypertension.  
38  
39

40 A possible explanation for the observation of rounding down is provided by Prospect  
41 Theory, used in Behavioral Economics, which describes decisions made under conditions  
42 of uncertainty. Negative perceptions about possible risks (or risk aversion) outweigh  
43 positive perceptions about possible gains.<sup>29</sup> There may be a behavioral bias towards  
44 rounding down; this may avoid perceived risks associated with adding more medications  
45 with less emphasis on gains from cardiovascular outcome prevention.  
46  
47  
48

49 A large cluster RCT (CHAP) documented improved management of hypertension in  
50 communities randomized to the intervention. This consisted of more accurate AOBP-based  
51 measurement in pharmacies with forwarding of abnormal BP results to family physicians.<sup>30</sup>  
52 The CHAP intervention resulted in a significant decrease in hospitalizations due to  
53 cardiovascular disease (myocardial infarction, stroke, heart failure).<sup>30</sup> In that trial, there  
54 was an improvement in BP from a mean of 142 mm Hg to 123 mm Hg when the initial  
55 pharmacy-based reading was elevated.<sup>31</sup> Systematically more accurate measurement of BP  
56  
57  
58

1  
2  
3 through the use of AOBP in the community, followed by notification of the primary care  
4 provider when BP was elevated, may have resulted in more treatment of elevated BP in  
5 primary care and decreased adverse cardiovascular outcomes.  
6  
7

8 The results in this real world observational study in two countries are plausibly consistent  
9 with those of the CHAP RCT. We found that practices with greater precision for BP  
10 measurement (less EDP) also had a lower prevalence of adverse cardiovascular outcomes  
11 for their patients. It is possible that these practices were using AOBP more often and were  
12 thus measuring BP with greater accuracy. Systematic rounding down associated with  
13 higher rates of EDP and presumably greater use of manual BP measurement by practices in  
14 this study appeared to be associated with an elevated frequency of adverse cardiovascular  
15 outcomes.  
16  
17

18 A switch to routine use of AOBP for most office-based BP measurements would require the  
19 purchase of enough machines to support the number of physicians and patients in each  
20 office, training of staff and health care providers, and changes in offices processes to  
21 support more consistent use of AOBP. We are not aware of financial or other practice level  
22 incentives in either country promoting this change.  
23  
24  
25

## 26 **Limitations**

27  
28  
29 The study has several strengths. We used data from routine community-based primary  
30 care. We also included a large sample of both patients and primary care providers from  
31 multiple settings across Canada and the UK, observed over a decade or more. Therefore,  
32 this study reasonably reflects current clinical practices for individuals receiving primary  
33 care in both countries.  
34  
35

36 This study has several shortcomings. This was a convenience sample of primary care  
37 practices that contributed EMR data to CPCSSN and the RCGP RSC. We surveyed practices  
38 for their use of AOBP in one network only (UTOPIAN); the survey was done at the office  
39 level rather than by physician. There may be recall bias and the actual proportion of  
40 patients whose BP was measured using an AOBP is unknown.  
41  
42

43 The study was not randomized; therefore, there may be unmeasured confounders  
44 associated with both higher incidence of cardiovascular outcomes and greater rates of EDP.  
45 These could include incentives or programs that could lead to improved precision in BP  
46 measurement along with lower rates in cardiovascular outcomes, such as quality standards  
47 or funding. Our findings are associations rather than causation. Nonetheless, the  
48 differences between groups persisted as practices switched to lower rates of EDP over time  
49 and there is no a priori reason to expect a change in unmeasured confounders in practices  
50 switching to AOBP and lower rates of EDP.  
51  
52  
53

## 54 **Conclusions**

1  
2  
3 In conclusion, systematic measurement errors including rounding down are associated  
4 with higher rates of EDP. It is likely that this is associated with more manual BP  
5 measurement in these primary care practices and in turn is correlated with a higher risk of  
6 adverse cardiovascular outcomes at a population level, although we cannot infer a causal  
7 relationship. Our findings suggest that the continued routine use of manual measurement  
8 of BP in primary care offices may be problematic. We recommend the use of AOBP as the  
9 standard of care for measuring and monitoring BP in medical offices.  
10  
11

### 12 **Acknowledgements:**

13  
14  
15 This study received funding through a grant by the North York General Hospital  
16 Foundation's Exploration Fund. Dr Greiver held an investigator award from the  
17 Department of Family and Community Medicine, University of Toronto and was supported  
18 by a research stipend from North York General Hospital. The Canadian Primary Care  
19 Sentinel Surveillance Network was a committee of the College of Family Physicians of  
20 Canada and was funded through a contribution agreement with the Public Health Agency of  
21 Canada. The views expressed herein do not necessarily represent the views of the Public  
22 Health Agency of Canada.  
23  
24

25  
26 None of the funding sources had any role in the writing of the manuscript or the decision to  
27 submit it for publication. None of the authors received payment to write this article by a  
28 pharmaceutical company or other agency.  
29

30 The authors have no competing interests to declare.  
31

32  
33 We are grateful to the physicians and patients who allow data sharing for the Royal College  
34 of General Practitioners (RCGP) Research and Surveillance Centre (RSC), for UTOPIAN and  
35 for other networks participating in CPCSSN. We also wish to thank EMIS, In Practice  
36 Systems, TPP SystemOne and other computerized medical record system vendors who  
37 collaborate with RCGP RSC to facilitate data extraction, and Apollo Medical Systems for  
38 data extraction in the UK. The principal funding of RCGP RSC is Public Health England, for  
39 its work as a surveillance system.  
40  
41

42  
43 Michelle Greiver (MG), Frank Sullivan (FS), Sumeet Kalia (SK) and Simon de Lusignan  
44 (SdeL) contributed to conception and design. Babak Aliarzadeh (BA) was responsible for  
45 acquisition of Canadian, and SdeL for UK data. Saddaf Syed (SS) was responsible for  
46 conducting the survey. SK, Rahim Moineddin (RM) and William Hinton (WH) contributed  
47 substantially to the analysis of data. MG and SK with input from SdeL drafted the initial  
48 version of the article. All authors, including Teja Voruganti, Martin Dawes and John  
49 Williams contributed to the interpretation of data. All authors reviewed and revised the  
50 article for important intellectual content and gave final approval of the version to be  
51 published. MG is the guarantor of this work, with SdeL for the RCGP RSC data, and, as such,  
52 had full access to all the data in the study and takes responsibility for the integrity of the  
53 data and the accuracy of the data analysis. MG had final responsibility for the decision to  
54 submit for publication.  
55  
56  
57  
58  
59  
60

1  
2  
3 Data are from a nationally representative Canadian repository of primary care EMR data,  
4 the Canadian Primary Care Sentinel Surveillance Network (<http://cpcssn.ca>). CPCSSN data  
5 are available to researchers as outlined in the process available on the website, [cpcssn.ca](http://cpcssn.ca) .  
6 Similarly, the Royal College of General Practitioners (RCGP) Research and Surveillance  
7 Centre (RSC) network database can be accessed by researchers following the process set  
8 out at: [www.rcgp.org.uk/rsc](http://www.rcgp.org.uk/rsc). Extra data is available by emailing  
9 [michelle.greiver@nygh.on.ca](mailto:michelle.greiver@nygh.on.ca).  
10  
11  
12  
13  
14  
15  
16  
17  
18  
19  
20  
21  
22  
23  
24  
25  
26  
27  
28  
29  
30  
31  
32  
33  
34  
35  
36  
37  
38  
39  
40  
41  
42  
43  
44  
45  
46  
47  
48  
49  
50  
51  
52  
53  
54  
55  
56  
57  
58  
59  
60

For peer review only



**Table 1: Frequency of end-digits for systolic and diastolic blood pressures**

| End-digits | Canada      |              | UK          |              |
|------------|-------------|--------------|-------------|--------------|
|            | Systolic BP | Diastolic BP | Systolic BP | Diastolic BP |
| <b>0</b>   | 32.4%       | 35.9%        | 33.8%       | 34.0%        |
| <b>1</b>   | 3.6%        | 3.7%         | 4.5%        | 4.5%         |
| <b>2</b>   | 13.1%       | 10.9%        | 10.3%       | 9.6%         |
| <b>3</b>   | 3.8%        | 3.8%         | 4.8%        | 4.7%         |
| <b>4</b>   | 10.4%       | 10.0%        | 9.1%        | 9.3%         |
| <b>5</b>   | 7.2%        | 6.8%         | 8.3%        | 8.2%         |
| <b>6</b>   | 9.3%        | 8.9%         | 8.5%        | 8.4%         |
| <b>7</b>   | 3.9%        | 3.8%         | 4.9%        | 4.8%         |
| <b>8</b>   | 12.6%       | 12.4%        | 11.2%       | 11.6%        |
| <b>9</b>   | 3.8%        | 3.4%         | 4.8%        | 4.9%         |

**Table 2: Patient/site characteristics and blood pressure measurements ending in zero for both systolic BP and diastolic BP in Canada (CPCSSN) and the UK (RCGP RSC database)**

| Characteristics                      | Canada                             |                                      |                                                                                               | UK                                 |                                      |                                                                                               |
|--------------------------------------|------------------------------------|--------------------------------------|-----------------------------------------------------------------------------------------------|------------------------------------|--------------------------------------|-----------------------------------------------------------------------------------------------|
|                                      | Number of Patients (% of patients) | Number of Blood Pressures (% of BPs) | Number of BPs with both systolic and diastolic BP ending in zero (% with both ending in zero) | Number of Patients (% of patients) | Number of Blood Pressures (% of BPs) | Number of BPs with both systolic and diastolic BP ending in zero (% with both ending in zero) |
| <b>Total</b>                         | 707,227                            | 5,503,663                            | 1,044,031 (19.0%)                                                                             | 1,558,471                          | 13,424,678                           | 2,674,497 (19.9%)                                                                             |
| <b>Age in years</b>                  |                                    |                                      |                                                                                               |                                    |                                      |                                                                                               |
| <b>18 to 39</b>                      | 189,254 (26.8%)                    | 816,136 (14.8%)                      | 165,025 (20.2%)                                                                               | 531,632 (34.1%)                    | 2,330,344 (17.4%)                    | 538,786(23.1%)                                                                                |
| <b>40 to 59</b>                      | 247,771 (35%)                      | 1,534,126 (27.9%)                    | 292,435 (19.1%)                                                                               | 498,272 (32.0%)                    | 3,298,174 (24.6%)                    | 631,260(19.1%)                                                                                |
| <b>60 to 79</b>                      | 201,364 (28.5%)                    | 2,115,655 (38.4%)                    | 377,724 (17.9%)                                                                               | 352,483 (22.6%)                    | 4,879,583 (36.3%)                    | 868,894(17.8%)                                                                                |
| <b>80+</b>                           | 68,838 (9.7%)                      | 1,037,716 (18.9%)                    | 208,847 (20.1%)                                                                               | 176,084 (11.3%)                    | 2,916,577 (21.7%)                    | 635,557(21.8%)                                                                                |
| <b>Sex</b>                           |                                    |                                      |                                                                                               |                                    |                                      |                                                                                               |
| <b>Female</b>                        | 414,644 (58.6%)                    | 3,325,256 (60.4%)                    | 648,357 (19.5%)                                                                               | 901,866 (57.9%)                    | 8,133,678 (60.6%)                    | 1,708,742(21.0%)                                                                              |
| <b>Male</b>                          | 292,583 (41.4%)                    | 2,178,377 (39.6%)                    | 395,674 (18.2%)                                                                               | 656,605 (42.13%)                   | 5,291,000 (39.4%)                    | 965,755(18.3%)                                                                                |
| <b>BMI range</b>                     |                                    |                                      |                                                                                               |                                    |                                      |                                                                                               |
| <b>Underweight (BMI &lt;18.5)</b>    | 10,233 (1.4%)                      | 70,776 (1.3%)                        | 14,649 (20.7%)                                                                                | 44,654 (2.9%)                      | 308,481 (2.3%)                       | 71,234(23.1%)                                                                                 |
| <b>Normal weight (18.5 to 24.9)</b>  | 170,684 (24.1%)                    | 1,177,970 (21.4%)                    | 236,883 (20.1%)                                                                               | 560,214 (36.0%)                    | 4,071,114 (30.3%)                    | 852,192(20.9%)                                                                                |
| <b>Overweight (25 to 29.9)</b>       | 182,141 (25.8%)                    | 1,545,777 (28.1%)                    | 283,163 (18.3%)                                                                               | 446,850(28.7%)                     | 4,412,326 (32.9%)                    | 842,338(19.1%)                                                                                |
| <b>Obesity class I (30 to 34.9)</b>  | 101,980 (14.4%)                    | 1,013,286 (18.4%)                    | 175,781 (17.3%)                                                                               | 200,761 (12.9%)                    | 2,421,241 (18.0%)                    | 455,572(18.8%)                                                                                |
| <b>Obesity class II (35 to 39.9)</b> | 42,235 (6.0%)                      | 468,239 (8.5%)                       | 77,408 (16.5%)                                                                                | 71,450 (4.6%)                      | 928,259 (6.9%)                       | 176,969(19.1%)                                                                                |
| <b>Obesity class III (≥40)</b>       | 27,451 (3.9%)                      | 320,682 (5.8%)                       | 52,327 (16.3%)                                                                                | 37,370 (2.4%)                      | 491,533 (3.7%)                       | 96,589(19.7%)                                                                                 |
| <b>Not available</b>                 | 172,503 (24.4%)                    | 906,903 (16.5%)                      | 203,820 (22.5%)                                                                               | 197,172 (12.7%)                    | 791,724 (5.9%)                       | 179,603(22.7%)                                                                                |
| <b>Diabetes</b>                      |                                    |                                      |                                                                                               |                                    |                                      |                                                                                               |

|                                     |                 |                   |                 |                   |                    |                  |
|-------------------------------------|-----------------|-------------------|-----------------|-------------------|--------------------|------------------|
| <b>Yes</b>                          | 86,103 (12.2%)  | 1,299,693 (23.6%) | 233,944 (18%)   | 65,335(4.2%)      | 1,909,804 (14.2%)  | 359,324(18.8%)   |
| <b>No</b>                           | 621,124 (87.8%) | 4,203,940 (76.4%) | 810,087 (19.3%) | 1,493,136 (95.1%) | 11,514,874 (85.8%) | 2,315,173(20.1%) |
| <b>Hypertension</b>                 |                 |                   |                 |                   |                    |                  |
| <b>Yes</b>                          | 185,508 (26.2%) | 2,704,921 (49.1%) | 486,787 (18%)   | 235,716 (15.1%)   | 6,359,131 (47.4%)  | 1,141,665(18.0%) |
| <b>No</b>                           | 521,719 (73.8%) | 2,798,712 (50.9%) | 557,244 (19.9%) | 1,322,755 (84.9%) | 7,065,547 (52.6%)  | 1,532,832(21.7%) |
| <b>Hypertension medications</b>     |                 |                   |                 |                   |                    |                  |
| <b>Yes</b>                          | 125,484 (17.7%) | 2,704,947 (49.1%) | 395,371 (17.7%) | 466,800 (30.0%)   | 8,327,009 (62.0%)  | 1,571,464(18.9%) |
| <b>No</b>                           | 581,743 (82.3%) | 2,798,686 (50.9%) | 648,660 (19.8%) | 1,091,671 (70.1%) | 5,097,669 (38.0%)  | 1,103,033(21.6%) |
| <b>Practice site size</b>           |                 |                   |                 |                   |                    |                  |
| <b>1st quartile (smallest site)</b> | 36,363 (5.1%)   | 249,957 (4.5%)    | 63,781 (25.5%)  | 173610(11.1%)     | 1,671,387 (12.5%)  | 303,084(18.1%)   |
| <b>2nd quartile</b>                 | 77,776 (11%)    | 584,575 (10.6%)   | 110,411 (18.9%) | 305460(19.6%)     | 2836288 (21.1%)    | 480,604(16.9%)   |
| <b>3rd quartile</b>                 | 156,601 (22.1%) | 1,156,892 (21.0%) | 228,521 (19.8%) | 416580(26.7%)     | 3,774,278          | 846,481(22.4%)   |
| <b>4th quartile (largest site)</b>  | 436,487 (61.7%) | 3,512,209 (63.8%) | 641,318 (18.3%) | 662821(42.5%)     | 5,142,725          | 1,044,328(20.3%) |
| <b>Measurement year*</b>            |                 |                   |                 |                   |                    |                  |
| <b>2006</b>                         | 52,168 (7.4%)   | 121,355 (2.2%)    | 32,335 (26.6%)  | 542,695(34.8%)    | 1,347,400 (10.0%)  | 325,843(24.2%)   |
| <b>2007</b>                         | 81,699 (11.6%)  | 183,591 (3.3%)    | 49,030 (26.7%)  | 553,033(35.5%)    | 1,342,979 (10.1%)  | 303,477(22.6%)   |
| <b>2008</b>                         | 125,781(17.8%)  | 277,858 (5.0%)    | 72,772 (26.2%)  | 563,222(36.1%)    | 1,353,092 (10.1%)  | 288,418(21.3%)   |
| <b>2009</b>                         | 167,345(23.7%)  | 368,245 (6.7%)    | 94,871 (25.8%)  | 572,940(36.8%)    | 1,358,664 (10.1%)  | 278,829(20.5%)   |
| <b>2010</b>                         | 213,250(30.2%)  | 531,316 (9.7%)    | 117,612 (22.1%) | 580,069(37.2%)    | 1,340,279 (10.0%)  | 266,242(19.9%)   |
| <b>2011</b>                         | 263,691(37.3%)  | 615,364 (11.2%)   | 125,282 (20.4%) | 590,921(37.9%)    | 1,354,956 (10.1%)  | 257,309(19.0%)   |
| <b>2012</b>                         | 299,590(42.4%)  | 700,903 (12.7%)   | 128,192 (18.3%) | 602,642(38.7%)    | 1,347,042 (10.0%)  | 249,344(18.5%)   |
| <b>2013</b>                         | 332,809(47.1%)  | 813,009 (14.8%)   | 133,434 (16.4%) | 617,073(39.6%)    | 1,366,085 (10.2%)  | 246,754(18.1%)   |
| <b>2014</b>                         | 360,180(50.9%)  | 894,350 (16.3%)   | 137,181 (15.3%) | 612,382(39.3%)    | 1,325,141 (9.9%)   | 235,377(17.8%)   |
| <b>2015</b>                         | 386,541(54.7%)  | 997,642 (18.1%)   | 153,322 (15.4%) | 594,589(38.2%)    | 1,289,040 (9.6%)   | 222,904(17.3%)   |

\*considering repeated measurements of blood pressure for each patient with respect to measurement year.

BMI - body mass index (weight in kg / height in meters<sup>2</sup>)

**Table 3: Adjusted odds ratios of recording zero as the last digit of systolic blood pressure by patient and site characteristics**

| Effect                   | Index Group                       | Reference group             | Canada     |                         |        |         | UK         |                         |       |         |
|--------------------------|-----------------------------------|-----------------------------|------------|-------------------------|--------|---------|------------|-------------------------|-------|---------|
|                          |                                   |                             | Odds ratio | 95% confidence interval |        | P-value | Odds ratio | 95% confidence interval |       | P-value |
| Age                      | 18 to 39                          | 80+                         | 1.088      | 1.063                   | 1.112  | <0.001  | 0.784      | 0.773                   | 0.795 | <0.001  |
|                          | 40 to 59                          | 80+                         | 1.012      | 0.990                   | 1.034  | 0.294   | 0.788      | 0.777                   | 0.798 | <0.001  |
|                          | 60 to 79                          | 80+                         | 0.942      | 0.923                   | 0.963  | <0.001  | 0.783      | 0.772                   | 0.794 | <0.001  |
| Sex                      | Female                            | Male                        | 1.100      | 1.089                   | 1.112  | <0.001  | 1.156      | 1.148                   | 1.163 | <0.001  |
| BMI                      | Underweight (BMI <18.5)           | Obesity class III (BMI ≥40) | 1.316      | 1.267                   | 1.366  | <0.001  | 1.047      | 1.019                   | 1.074 | 0.001   |
|                          | Normal (BMI 18.5 to 24.9)         | Obesity class III           | 1.226      | 1.192                   | 1.258  | <0.001  | 0.960      | 0.939                   | 0.980 | <0.001  |
|                          | Overweight (BMI 25 to 29.9)       | Obesity class III           | 1.135      | 1.104                   | 1.166  | <0.001  | 0.947      | 0.926                   | 0.966 | <0.001  |
|                          | Obesity class I (BMI 30 to 34.9)  | Obesity class III           | 1.065      | 1.036                   | 1.096  | <0.001  | 0.953      | 0.932                   | 0.973 | <0.001  |
|                          | Obesity class II (BMI 35 to 39.9) | Obesity class III           | 1.008      | 0.978                   | 1.040  | 0.618   | 0.967      | 0.943                   | 0.992 | 0.007   |
| Diabetes                 | Yes                               | No                          | 0.982      | 0.964                   | 0.999  | 0.047   | 1.025      | 1.008                   | 1.042 | 0.004   |
| Hypertension             | Yes                               | No                          | 0.892      | 0.877                   | 0.908  | <0.001  | 0.790      | 0.780                   | 0.799 | <0.001  |
| Hypertension medications | Yes                               | No                          | 0.967      | 0.947                   | 0.986  | 0.001   | 1.057      | 1.047                   | 1.068 | <0.001  |
| Practice Site size       | 1st quartile (smallest site)      | 4th quartile (largest site) | 1.950      | 1.908                   | 1.990  | <0.001  | 0.816      | 0.809                   | 0.823 | <0.001  |
|                          | 2nd quartile                      | 4th quartile (largest site) | 1.075      | 1.058                   | 1.094  | <0.001  | 0.893      | 0.885                   | 0.900 | <0.001  |
|                          | 3rd quartile                      | 4th quartile (largest site) | 1.087      | 1.074                   | 1.100  | <0.001  | 0.891      | 0.883                   | 0.899 | <0.001  |
| Measurement year         | 2006                              | 2015                        | 1.910      | 1.833                   | 1.990  | <0.001  | 1.647      | 1.625                   | 1.668 | <0.001  |
|                          | 2007                              | 2015                        | 1.923      | 1.857                   | 1.989  | <0.001  | 1.473      | 1.451                   | 1.494 | <0.001  |
|                          | 2008                              | 2015                        | 1.840      | 1.790                   | 1.895  | <0.001  | 1.376      | 1.357                   | 1.396 | <0.001  |
|                          | 2009                              | 2015                        | 1.858      | 1.815                   | 1.903  | <0.001  | 1.321      | 1.300                   | 1.341 | <0.001  |
|                          | 2010                              | 2015                        | 1.582      | 1.548                   | 1.617  | <0.001  | 1.257      | 1.238                   | 1.275 | <0.001  |
|                          | 2011                              | 2015                        | 1.379      | 1.352                   | 1.407  | <0.001  | 1.178      | 1.161                   | 1.196 | <0.001  |
|                          | 2012                              | 2015                        | 1.239      | 1.216                   | 1.262  | <0.001  | 1.112      | 1.094                   | 1.129 | <0.001  |
|                          | 2013                              | 2015                        | 1.096      | 1.077                   | 1.116  | <0.001  | 1.052      | 1.038                   | 1.067 | <0.001  |
| 2014                     | 2015                              | 1.037                       | 1.021      | 1.052                   | <0.001 | 1.016   | 1.000      | 1.030                   | 0.041 |         |

BMI - body mass index (weight in kg / height in meters<sup>2</sup>)

**Table 4: Number and percentage of sites in each EDP group from 2006 to 2015**

| Year | Canada        |             |            |             |          |             | UK            |             |            |             |          |             |
|------|---------------|-------------|------------|-------------|----------|-------------|---------------|-------------|------------|-------------|----------|-------------|
|      | Low or no EDP |             | Medium EDP |             | High EDP |             | Low or no EDP |             | Medium EDP |             | High EDP |             |
|      | N             | Percent (%) | N          | Percent (%) | N        | Percent (%) | N             | Percent (%) | N          | Percent (%) | N        | Percent (%) |
| 2006 | 1             | 3.6%        | 1          | 3.6%        | 26       | 92.9%       | 61            | 38.4%       | 39         | 24.5%       | 59       | 37.1%       |
| 2007 | 3             | 7.3%        | 3          | 7.3%        | 35       | 85.4%       | 69            | 42.9%       | 41         | 25.5%       | 51       | 31.7%       |
| 2008 | 8             | 13.8%       | 3          | 5.2%        | 47       | 81.0%       | 71            | 44.1%       | 45         | 28.0%       | 45       | 28.0%       |
| 2009 | 8             | 11.1%       | 7          | 9.7%        | 57       | 79.2%       | 74            | 46.0%       | 45         | 28.0%       | 42       | 26.1%       |
| 2010 | 15            | 15.3%       | 11         | 11.2%       | 72       | 73.5%       | 76            | 46.6%       | 45         | 27.6%       | 42       | 25.8%       |
| 2011 | 17            | 15.5%       | 16         | 14.5%       | 77       | 70.0%       | 78            | 47.9%       | 45         | 27.6%       | 40       | 24.5%       |
| 2012 | 27            | 21.8%       | 25         | 20.2%       | 72       | 58.1%       | 82            | 50.3%       | 40         | 24.5%       | 41       | 25.2%       |
| 2013 | 33            | 22.8%       | 33         | 22.8%       | 79       | 54.5%       | 79            | 48.5%       | 48         | 29.4%       | 36       | 22.1%       |
| 2014 | 30            | 20.0%       | 41         | 27.3%       | 79       | 52.7%       | 85            | 52.1%       | 42         | 25.8%       | 36       | 22.1%       |
| 2015 | 41            | 26.5%       | 44         | 28.4%       | 70       | 45.2%       | 84            | 51.2%       | 44         | 26.8%       | 36       | 22.0%       |

EDP – End digit preference

**Table 5: Mean systolic blood pressure by EDP group**

|                         |                      | CPCSSN database (Canada) |                   |           | RCGP RSC database (UK) |                   |           |
|-------------------------|----------------------|--------------------------|-------------------|-----------|------------------------|-------------------|-----------|
|                         |                      | No. of BP measurements   | Mean sBP in mm Hg | Std. Dev. | No. of BP measurements | Mean sBP in mm Hg | Std. Dev. |
| <b>All patients</b>     | <b>Low or no EDP</b> | 1,151,795                | 128.21            | 18.92     | 5,618,800              | 135.05            | 20.09     |
|                         | <b>High EDP</b>      | 2,925,279                | 126.24            | 18.52     | 3,624,391              | 133.29            | 19.63     |
|                         | <b>Difference</b>    |                          | 1.97              |           |                        | 1.76              |           |
| <b>Hypertensive</b>     | <b>Low or no EDP</b> | 584,082                  | 134.59            | 19.29     | 2,687,218              | 142.63            | 19.03     |
|                         | <b>High EDP</b>      | 1,436,251                | 133.51            | 18.36     | 1,715,006              | 141.23            | 18.19     |
|                         | <b>Difference</b>    |                          | 1.08              |           |                        | 1.40              |           |
| <b>Non-hypertensive</b> | <b>Low or no EDP</b> | 567,713                  | 121.65            | 16.09     | 2,931,582              | 128.10            | 18.44     |
|                         | <b>High EDP</b>      | 1,489,028                | 119.23            | 15.77     | 1,909,385              | 126.15            | 18.07     |
|                         | <b>Difference</b>    |                          | 2.42              |           |                        | 1.95              |           |
| <b>Diabetic</b>         | <b>Low or no EDP</b> | 300,630                  | 131.42            | 18.81     | 823,959                | 138.89            | 18.75     |
|                         | <b>High EDP</b>      | 675,920                  | 130.52            | 18.09     | 515,843                | 136.76            | 17.79     |
|                         | <b>Difference</b>    |                          | 0.9               |           |                        | 2.13              |           |
| <b>Non-Diabetic</b>     | <b>Low or no EDP</b> | 851,165                  | 127.08            | 18.83     | 4,794,841              | 134.39            | 20.23     |
|                         | <b>High EDP</b>      | 2,249,359                | 124.96            | 18.46     | 3,108,548              | 132.71            | 19.86     |
|                         | <b>Difference</b>    |                          | 2.12              |           |                        | 1.68              |           |

EDP – End digit preference  
sBP – systolic blood pressure  
Std. Dev – standard deviation  
Std. Dev – standard deviation

**Table 6: Standardized morbidity ratio for groups with high EDP group when compared to groups with low or no EDP**

| Angina                       |          |                       |      |
|------------------------------|----------|-----------------------|------|
| Parameter                    | Estimate | 95% Confidence Limits |      |
| Standardized morbidity ratio | 1.25     | 1.22                  | 1.28 |
| Acute Myocardial infraction  |          |                       |      |
| Standardized morbidity ratio | 1.16     | 1.14                  | 1.19 |
| Stroke                       |          |                       |      |
| Standardized morbidity ratio | 1.15     | 1.12                  | 1.17 |

EDP – End digit preference

1  
2  
3 Figure legends  
4

5 Figure 1: Histogram of systolic and diastolic blood pressure in Canada and the UK  
6

7 Figure 2: Impact of adopting automated office blood pressure machines on end digit  
8 preference for systolic blood pressure in Toronto  
9

10 Figure 3: Proportions of systolic and diastolic BPs ending in 1, 3, 7 or 9 per practice site for  
11 each year of interest in Canada and UK from 2006 to 2015  
12

13 Figure 4: Frequency of cardiovascular events in high EDP and no or low EDP group in the  
14 UK  
15

16  
17  
18  
19  
20  
21  
22  
23  
24  
25  
26  
27  
28  
29  
30  
31  
32  
33  
34  
35  
36  
37  
38  
39  
40  
41  
42  
43  
44  
45  
46  
47  
48  
49  
50  
51 **References:**

- 52 1. World Health Organization, global health estimates. World Health Organization. Health statistics  
53 and information systems Web site. [http://www.who.int/healthinfo/global\\_burden\\_disease/en/](http://www.who.int/healthinfo/global_burden_disease/en/).  
54 Published 2016. Accessed May 29, 2016.  
55  
56  
57  
58  
59  
60



- 1
  - 2
  - 3
  - 4
  - 5
  - 6
  - 7
  - 8
  - 9
  - 10
  - 11
  - 12
  - 13
  - 14
  - 15
  - 16
  - 17
  - 18
  - 19
  - 20
  - 21
  - 22
  - 23
  - 24
  - 25
  - 26
  - 27
  - 28
  - 29
  - 30
  - 31
  - 32
  - 33
  - 34
  - 35
  - 36
  - 37
  - 38
  - 39
  - 40
  - 41
  - 42
  - 43
  - 44
  - 45
  - 46
  - 47
  - 48
  - 49
  - 50
  - 51
  - 52
  - 53
  - 54
  - 55
  - 56
  - 57
  - 58
  - 59
  - 60
2. Leung AA, Nerenberg K, Daskalopoulou SS, et al. Hypertension Canada's 2016 Canadian Hypertension Education Program Guidelines for Blood Pressure Measurement, Diagnosis, Assessment of Risk, Prevention, and Treatment of Hypertension. *Can J Cardiol*. 2016;32(5):569-588.
  3. McManus RJ, Mant J, Hull MR, Hobbs FD. Does changing from mercury to electronic blood pressure measurement influence recorded blood pressure? An observational study. *Br J Gen Pract*. 2003;53(497):953-956.
  4. Pickering TG, Hall JE, Appel LJ, et al. Recommendations for blood pressure measurement in humans and experimental animals: Part 1: blood pressure measurement in humans: a statement for professionals from the Subcommittee of Professional and Public Education of the American Heart Association Council on High Blood Pressure Research. *Hypertension*. 2005;45(1):142-161.
  5. Beevers G, Lip GY, O'Brien E. ABC of hypertension: Blood pressure measurement. Part II- conventional sphygmomanometry: technique of auscultatory blood pressure measurement. *BMJ*. 2001;322(7293):1043-1047.
  6. Correa A, Hinton W, McGovern A, et al. Royal College of General Practitioners Research and Surveillance Centre (RCGP RSC) sentinel network: a cohort profile. *BMJ Open*. 2016;6(4):e011092.
  7. Nietert PJ, Wessell AM, Feifer C, Ornstein SM. Effect of terminal digit preference on blood pressure measurement and treatment in primary care. *Am J Hypertens*. 2006;19(2):147-152.
  8. de Lusignan S, Belsey J, Hague N, Dzregah B. End-digit preference in blood pressure recordings of patients with ischaemic heart disease in primary care. *J Hum Hypertens*. 2004;18(4):261-265.
  9. Myers MG, Godwin M, Dawes M, et al. Conventional versus automated measurement of blood pressure in primary care patients with systolic hypertension: randomised parallel design controlled trial. *BMJ*. 2011;342.
  10. Myers MG. Automated blood pressure measurement in routine clinical practice. *Blood Press Monit*. 2006;11(2):59-62.
  11. Myers MG, Kaczorowski J, Dawes M, Godwin M. Automated office blood pressure measurement in primary care. *Can Fam Physician*. 2014;60(2):127-132.
  12. Myers MG, Valdivieso M, Kiss A. Use of automated office blood pressure measurement to reduce the white coat response. *J Hypertens*. 2009;27(2):280-286.
  13. Mancia G, Fagard R, Narkiewicz K, et al. 2013 ESH/ESC Guidelines for the management of arterial hypertension: the Task Force for the management of arterial hypertension of the European Society of Hypertension (ESH) and of the European Society of Cardiology (ESC). *J Hypertens*. 2013;31(7):1281-1357.
  14. Kaczorowski J, Myers MG, Gelfer M, et al. How do family physicians measure blood pressure in routine clinical practice? National survey of Canadian family physicians. *Can Fam Physician*. 2017;63(3):e193-e199.
  15. von Elm E, Altman DG, Egger M, et al. The Strengthening the Reporting of Observational Studies in Epidemiology (STROBE) Statement: guidelines for reporting observational studies. *Int J Surg*. 2014;12(12):1495-1499.
  16. Birtwhistle R, Keshavjee K, Lambert-Lanning A, et al. Building a pan-Canadian primary care sentinel surveillance network: initial development and moving forward. *J Am Board Fam Med*. 2009;22(4):412-422.
  17. *Primary health care intelligence: 2013 progress report of the Canadian Primary Care Sentinel Surveillance Network (CPCSSN)*. Kingston, Ontario: Queen's University;2013.
  18. Williamson T, Green ME, Birtwhistle R, et al. Validating the 8 CPCSSN Case Definitions for Chronic Disease Surveillance in a Primary Care Database of Electronic Health Records. *The Annals of Family Medicine*. 2014;12(4):367-372.

19. Kumar S, de Lusignan S, McGovern A, et al. Ischaemic stroke, haemorrhage, and mortality in older patients with chronic kidney disease newly started on anticoagulation for atrial fibrillation: a population based study from UK primary care. *Bmj*. 2018;360:k342.
20. Pullenayegum EM. Multiple imputation for the analysis of longitudinal data subject to irregular observation. *Stat Med*. 2016;35(11):1800-1818.
21. Davison A, Hinkley D. *Bootstrap methods and their application, Vol 1*. Cambridge, UK: Cambridge University Press; 1997.
22. James G, Witten D, Hastie T, Tibshirani R. *An Introduction to Statistical Learning - with Applications in R* | Gareth James | Springer. New York: Springer-Verlag New York; 2013.
23. Rencher AC. *Methods of Multivariate Analysis*. John Wiley & Sons; 2003.
24. Campbell NR, Kaczorowski J, Lewanczuk RZ, et al. 2010 Canadian Hypertension Education Program (CHEP) recommendations: the scientific summary - an update of the 2010 theme and the science behind new CHEP recommendations. *Can J Cardiol*. 2010;26(5):236-240.
25. Harrison WN, Lancashire RJ, Marshall TP. Variation in recorded blood pressure terminal digit bias in general practice. *J Hum Hypertens*. 2008;22(3):163-167.
26. de Lusignan S, Gallagher H, Jones S, et al. Audit-based education lowers systolic blood pressure in chronic kidney disease: the Quality Improvement in CKD (QICKD) trial results. *Kidney Int*. 2013;84(3):609-620.
27. Alsanjari ON, de Lusignan S, van Vlymen J, et al. Trends and transient change in end-digit preference in blood pressure recording: studies of sequential and longitudinal collected primary care data. *Int J Clin Pract*. 2012;66(1):37-43.
28. Wang Y, Qain Y, Zhang J, Tang X, Sun J, Zhu D. Longitudinal change in end-digit preference in blood pressure recordings of patients with hypertension in primary care clinics: Minhang study. *Blood Press Monit*. 2015;20(2):74-78.
29. Kahneman D, Tversky A. Prospect theory; an analysis of decision under risk. *Economica*. 1979;47:263-291.
30. Kaczorowski J, Chambers LW, Dolovich L, et al. Improving cardiovascular health at population level: 39 community cluster randomised trial of Cardiovascular Health Awareness Program (CHAP). *BMJ*. 2011;342.
31. Ye C, Foster G, Kaczorowski J, et al. The impact of a cardiovascular health awareness program (CHAP) on reducing blood pressure: a prospective cohort study. *BMC Public Health*. 2013;13:1230.

1  
2  
3  
4  
5  
6  
7  
8  
9  
10  
11  
12  
13  
14  
15  
16  
17  
18  
19  
20  
21  
22  
23  
24  
25  
26  
27  
28  
29  
30  
31  
32  
33  
34  
35  
36  
37  
38  
39  
40  
41  
42  
43  
44  
45  
46  
47  
48  
49  
50  
51  
52  
53  
54  
55  
56  
57  
58  
59  
60

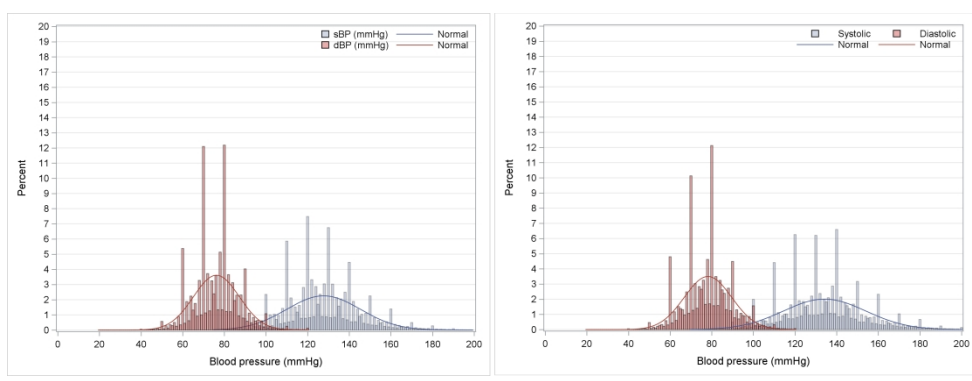

Figure 1: Histogram of systolic and diastolic blood pressure in Canada(left) and the UK (right)

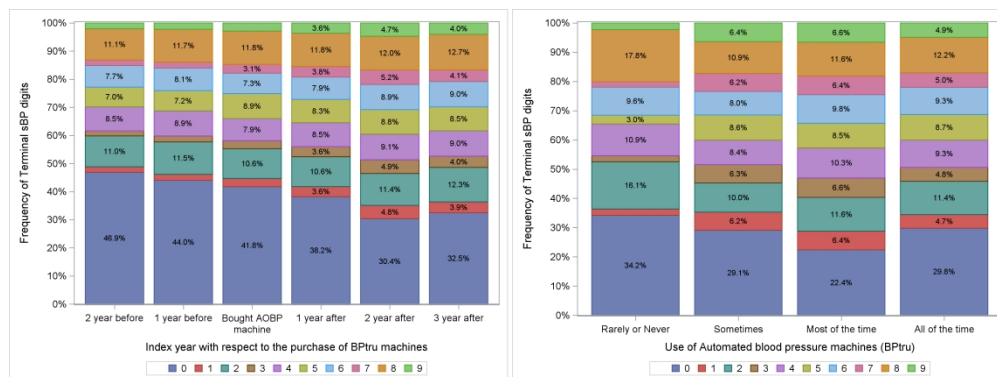

Figure 2: Impact of adopting automated office blood pressure machines on end digit preference for systolic blood pressure in Toronto

1  
2  
3  
4  
5  
6  
7  
8  
9  
10  
11  
12  
13  
14  
15  
16  
17  
18  
19  
20  
21  
22  
23  
24  
25  
26  
27  
28  
29  
30  
31  
32  
33  
34  
35  
36  
37  
38  
39  
40  
41  
42  
43  
44  
45  
46  
47  
48  
49  
50  
51  
52  
53  
54  
55  
56  
57  
58  
59  
60

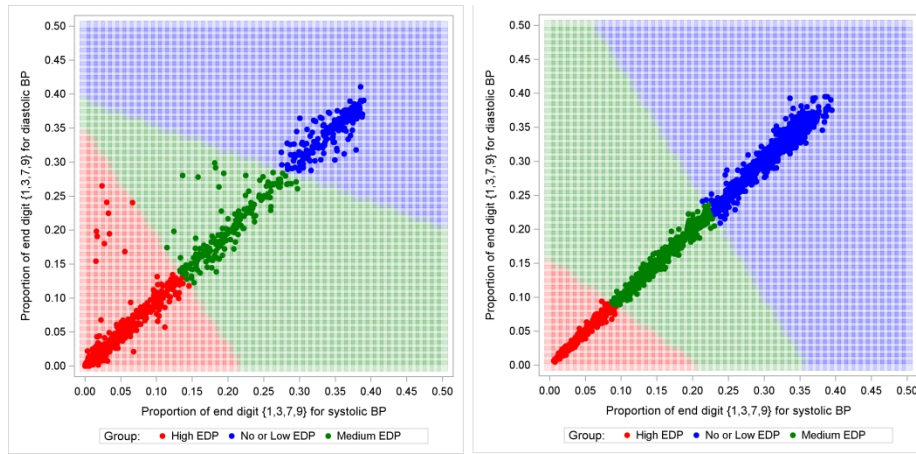

Figure 3: Proportions of systolic and diastolic BPs ending in 1, 3, 7 or 9 per practice site for each year of interest in Canada (left) and UK (right) from 2006 to 2015

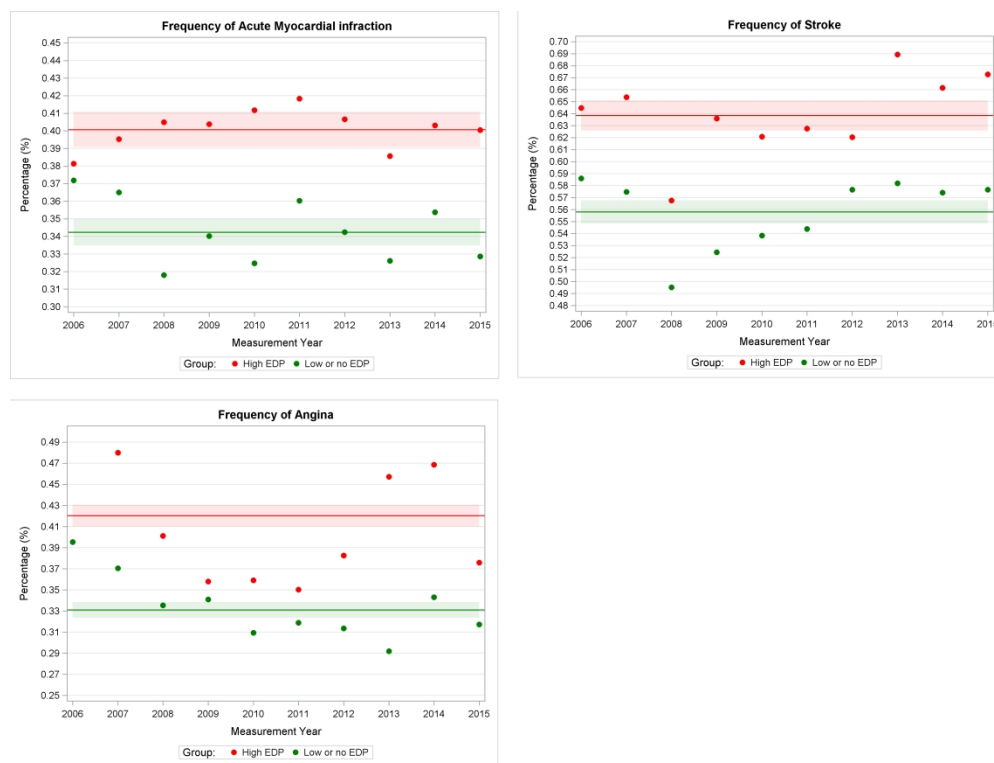

Figure 4: Frequency of cardiovascular events in high EDP and no or low EDP group in the UK

STROBE Statement—Checklist of items that should be included in reports of *cross-sectional studies*

|                              | Item No | Recommendation                                                                                                                                                                                                             |
|------------------------------|---------|----------------------------------------------------------------------------------------------------------------------------------------------------------------------------------------------------------------------------|
| <b>Title and abstract</b>    | 1       | (a) Indicate the study's design with a commonly used term in the title or the abstract:<br><b>Page 1</b>                                                                                                                   |
|                              |         | (b) Provide in the abstract an informative and balanced summary of what was done and what was found: <b>Page 2</b>                                                                                                         |
| <b>Introduction</b>          |         |                                                                                                                                                                                                                            |
| Background/rationale         | 2       | Explain the scientific background and rationale for the investigation being reported<br><b>Page 3-4</b>                                                                                                                    |
| Objectives                   | 3       | State specific objectives, including any prespecified hypotheses <b>Page 3</b>                                                                                                                                             |
| <b>Methods</b>               |         |                                                                                                                                                                                                                            |
| Study design                 | 4       | Present key elements of study design early in the paper <b>Page 3</b>                                                                                                                                                      |
| Setting                      | 5       | Describe the setting, locations, and relevant dates, including periods of recruitment, exposure, follow-up, and data collection <b>Page 4-5</b>                                                                            |
| Participants                 | 6       | (a) Give the eligibility criteria, and the sources and methods of selection of participants <b>Page 4</b>                                                                                                                  |
| Variables                    | 7       | Clearly define all outcomes, exposures, predictors, potential confounders, and effect modifiers. Give diagnostic criteria, if applicable <b>Page 4</b>                                                                     |
| Data sources/<br>measurement | 8*      | For each variable of interest, give sources of data and details of methods of assessment (measurement). Describe comparability of assessment methods if there is more than one group <b>Page 5-6</b>                       |
| Bias                         | 9       | Describe any efforts to address potential sources of bias <b>N/A</b>                                                                                                                                                       |
| Study size                   | 10      | Explain how the study size was arrived at <b>N/A</b>                                                                                                                                                                       |
| Quantitative variables       | 11      | Explain how quantitative variables were handled in the analyses. If applicable, describe which groupings were chosen and why <b>Page 5-6</b>                                                                               |
| Statistical methods          | 12      | (a) Describe all statistical methods, including those used to control for confounding<br><b>Page 5-6</b>                                                                                                                   |
|                              |         | (b) Describe any methods used to examine subgroups and interactions <b>Page 5-6</b>                                                                                                                                        |
|                              |         | (c) Explain how missing data were addressed <b>N/A</b>                                                                                                                                                                     |
|                              |         | (d) If applicable, describe analytical methods taking account of sampling strategy<br><b>N/A</b>                                                                                                                           |
|                              |         | (e) Describe any sensitivity analyses <b>N/A</b>                                                                                                                                                                           |
| <b>Results</b>               |         |                                                                                                                                                                                                                            |
| Participants                 | 13*     | (a) Report numbers of individuals at each stage of study—eg numbers potentially eligible, examined for eligibility, confirmed eligible, included in the study, completing follow-up, and analysed <b>Page 6</b>            |
|                              |         | (b) Give reasons for non-participation at each stage <b>N/A</b>                                                                                                                                                            |
|                              |         | (c) Consider use of a flow diagram <b>N/A</b>                                                                                                                                                                              |
| Descriptive data             | 14*     | (a) Give characteristics of study participants (eg demographic, clinical, social) and information on exposures and potential confounders <b>Page 6</b>                                                                     |
|                              |         | (b) Indicate number of participants with missing data for each variable of interest<br><b>Page 7</b>                                                                                                                       |
| Outcome data                 | 15*     | Report numbers of outcome events or summary measures <b>Page 7</b>                                                                                                                                                         |
| Main results                 | 16      | (a) Give unadjusted estimates and, if applicable, confounder-adjusted estimates and their precision (eg, 95% confidence interval). Make clear which confounders were adjusted for and why they were included <b>Page 7</b> |

|                          |    |                                                                                                                                                                                            |
|--------------------------|----|--------------------------------------------------------------------------------------------------------------------------------------------------------------------------------------------|
|                          |    | (b) Report category boundaries when continuous variables were categorized <b>Page 7</b>                                                                                                    |
|                          |    | (c) If relevant, consider translating estimates of relative risk into absolute risk for a meaningful time period <b>N/A</b>                                                                |
| Other analyses           | 17 | Report other analyses done—eg analyses of subgroups and interactions, and sensitivity analyses <b>Page 7</b>                                                                               |
| <b>Discussion</b>        |    |                                                                                                                                                                                            |
| Key results              | 18 | Summarise key results with reference to study objectives <b>Page 7</b>                                                                                                                     |
| Limitations              | 19 | Discuss limitations of the study, taking into account sources of potential bias or imprecision. Discuss both direction and magnitude of any potential bias <b>Page 8-9</b>                 |
| Interpretation           | 20 | Give a cautious overall interpretation of results considering objectives, limitations, multiplicity of analyses, results from similar studies, and other relevant evidence <b>Page 7-9</b> |
| Generalisability         | 21 | Discuss the generalisability (external validity) of the study results <b>Page 9</b>                                                                                                        |
| <b>Other information</b> |    |                                                                                                                                                                                            |
| Funding                  | 22 | Give the source of funding and the role of the funders for the present study and, if applicable, for the original study on which the present article is based <b>Page 10</b>               |

\*Give information separately for exposed and unexposed groups.

**Note:** An Explanation and Elaboration article discusses each checklist item and gives methodological background and published examples of transparent reporting. The STROBE checklist is best used in conjunction with this article (freely available on the Web sites of PLoS Medicine at <http://www.plosmedicine.org/>, Annals of Internal Medicine at <http://www.annals.org/>, and Epidemiology at <http://www.epidem.com/>). Information on the STROBE Initiative is available at [www.strobe-statement.org](http://www.strobe-statement.org).



1  
2  
3  
4  
5  
6  
7  
8  
9  
10  
11  
12  
13  
14  
15  
16  
17  
18  
19  
20  
21  
22  
23  
24  
25  
26  
27  
28  
29  
30  
31  
32  
33  
34  
35  
36  
37  
38  
39  
40  
41  
42  
43  
44  
45  
46  
47  
48  
49  
50  
51  
52  
53  
54  
55  
56  
57  
58  
59  
60

1) Is there an automated machine (e.g. BPTru) in your office?

Yes [ ]

No [ ]

2) If Yes, when was the machine purchased?

Year [ ]

Month [ ]

3) If Yes, how many BP machines are there at your office?

Enter digit [ ]

4) How many exam rooms are there at your office?

Enter digit [ ]

5. Thinking of the past year, how often is the automated BP machine used to take blood pressures in your office?

-rarely or never

-some of the time

-most of the time

-almost all the time or all the time

# BMJ Open

## Trends in end digit preference for blood pressure and associations with cardiovascular outcomes in Canadian and UK Primary Care: a retrospective observational study

|                                 |                                                                                                                                                                                                                                                                                                                                                                                                                                                                                                                                                                                                                                                                                                                                                                                                                                                                                                                                                                                                                                         |
|---------------------------------|-----------------------------------------------------------------------------------------------------------------------------------------------------------------------------------------------------------------------------------------------------------------------------------------------------------------------------------------------------------------------------------------------------------------------------------------------------------------------------------------------------------------------------------------------------------------------------------------------------------------------------------------------------------------------------------------------------------------------------------------------------------------------------------------------------------------------------------------------------------------------------------------------------------------------------------------------------------------------------------------------------------------------------------------|
| Journal:                        | <i>BMJ Open</i>                                                                                                                                                                                                                                                                                                                                                                                                                                                                                                                                                                                                                                                                                                                                                                                                                                                                                                                                                                                                                         |
| Manuscript ID                   | bmjopen-2018-024970.R2                                                                                                                                                                                                                                                                                                                                                                                                                                                                                                                                                                                                                                                                                                                                                                                                                                                                                                                                                                                                                  |
| Article Type:                   | Research                                                                                                                                                                                                                                                                                                                                                                                                                                                                                                                                                                                                                                                                                                                                                                                                                                                                                                                                                                                                                                |
| Date Submitted by the Author:   | 16-Dec-2018                                                                                                                                                                                                                                                                                                                                                                                                                                                                                                                                                                                                                                                                                                                                                                                                                                                                                                                                                                                                                             |
| Complete List of Authors:       | Greiver, Michelle; University of Toronto, Department of Family and Community Medicine; North York General Hospital<br>Kalia, Sumeet; University of Toronto, Department of Family and Community Medicine<br>Voruganti, R.; University of Toronto, Family and Community Medicine<br>Aliarzadeh, Babak; University of Toronto, Department of Family and Community Medicine<br>Moineddin, Rahim; University of Toronto, Family and Community Medicine; Institute for Clinical Evaluative Sciences,<br>Hinton, William; University of Surrey, Department of Clinical and Experimental Medicine<br>Dawes, Martin; University of British Columbia, Department of Family Practice<br>Sullivan, Frank; University of St. Andrews, ; North York General hospital,<br><br>Syed, Saddaf; University of Toronto, Department of Family and Community Medicine<br>Williams, John; University of Surrey, Department of Clinical and Experimental Medicine<br>de Lusignan, Simon; University of Surrey, Department of Clinical and Experimental Medicine |
| <b>Primary Subject Heading</b>: | Cardiovascular medicine                                                                                                                                                                                                                                                                                                                                                                                                                                                                                                                                                                                                                                                                                                                                                                                                                                                                                                                                                                                                                 |
| Secondary Subject Heading:      | General practice / Family practice, Health services research, Health informatics                                                                                                                                                                                                                                                                                                                                                                                                                                                                                                                                                                                                                                                                                                                                                                                                                                                                                                                                                        |
| Keywords:                       | Hypertension < CARDIOLOGY, Information technology < BIOTECHNOLOGY & BIOINFORMATICS, Ischaemic heart disease < CARDIOLOGY, Quality in health care < HEALTH SERVICES ADMINISTRATION & MANAGEMENT                                                                                                                                                                                                                                                                                                                                                                                                                                                                                                                                                                                                                                                                                                                                                                                                                                          |
|                                 |                                                                                                                                                                                                                                                                                                                                                                                                                                                                                                                                                                                                                                                                                                                                                                                                                                                                                                                                                                                                                                         |

SCHOLARONE™  
Manuscripts

1  
2  
3  
4  
5  
6  
7  
8  
9  
10  
11  
12  
13  
14  
15  
16  
17  
18  
19  
20  
21  
22  
23  
24  
25  
26  
27  
28  
29  
30  
31  
32  
33  
34  
35  
36  
37  
38  
39  
40  
41  
42  
43  
44  
45  
46  
47  
48  
49  
50  
51  
52  
53  
54  
55  
56  
57  
58  
59  
60

## Authors & Title

### **Trends in end digit preference for blood pressure and associations with cardiovascular outcomes in Canadian and UK Primary Care: a retrospective observational study**

Michelle Greiver, MD MSc CCFP FCFP<sup>1,2,3</sup>, Sumeet Kalia MSc<sup>3</sup>, Teja Voruganti PhD<sup>6</sup>, Babak Aliarzadeh MD MPH<sup>3</sup>, Rahim Moineddin PhD<sup>3,5</sup>, William Hinton MSc<sup>7</sup>, Martin Dawes MD<sup>8</sup>, Frank Sullivan FRSE, FRCP, FRCGP, CCFP<sup>4</sup>, Saddaf Syed OCT, PGCE, BSc.<sup>3</sup>, John Williams MSc, MRCP, FFCI, FRCGP<sup>7</sup>, Simon de Lusignan MD, MSc, FBCS, FACHI, FFCI, FRCGP<sup>7,9</sup>

<sup>1</sup> Department of Family and Community Medicine, North York General Hospital

<sup>2</sup> North York General Hospital

<sup>3</sup> Department of Family and Community Medicine, Faculty of Medicine, University of Toronto

<sup>4</sup> Medical school, University of St Andrews, Scotland

<sup>5</sup> Institute for Clinical Evaluative Sciences

<sup>6</sup> Faculty of Medicine, University of Toronto

<sup>7</sup> University of Surrey, Guildford UK

<sup>8</sup> Department of Family Practice, University of British Columbia

<sup>9</sup> Royal College of General Practice Research and Surveillance Centre, London UK

#### Corresponding Author:

Michelle Greiver, MSc MD CCFP FCFP

Gordon F. Cheesbrough Chair in Family and Community Medicine, North York General Hospital

Director, UTOPIAN Practice Based Research Network

North York General Hospital, Family and Community Medicine

4001 Leslie street, LE 140

Toronto, ON, CAN M2K 1E1

416-756-6483

mgreiver@rogers.com

Word Count: 4047

Number of Tables: 6

Number of Figures: 4

## Abstract

**Objectives:** to study systematic errors in recording blood pressure (BP) as measured by end digit preference (EDP); to determine associations between EDP, uptake of Automated Office BP (AOBP) machines and cardiovascular outcomes.

**Design:** Retrospective observational study using routinely collected electronic medical record data from 2006 to 2015 and a survey on year of AOBP acquisition in Toronto, Canada in 2017.

**Setting:** Primary care practices in Canada and the UK

**Participants:** Adults aged 18 years or more.

**Main outcome measures:** Mean rates of EDP and change in rates. Rates of EDP following acquisition of an AOBP machine. Associations between site EDP levels and mean BP. Associations between site EDP levels and frequency of cardiovascular outcomes.

**Results:** 707,227 patients in Canada and 1,558,471 patients in the UK were included. From 2006 to 2015, the mean rate of BP readings with both systolic and diastolic pressure ending in zero decreased from 26.6% to 15.4% in Canada and from 24.2% to 17.3% in the U.K. Systolic BP readings ending in zero decreased from 41.8% to 32.5% in the three years following the purchase of an AOBP machine. Sites with high EDP had a mean systolic BP of 2.0 mmHg in Canada, and 1.7 mmHg in the UK, lower than sites with no or low EDP. Patients in sites with high levels of EDP had a higher frequency of stroke (standardized morbidity ratio SMR 1.15, 95% CI 1.12-1.17), myocardial infarcts (SMR 1.16, 95% CI 1.14-1.19), and angina (SMR 1.25, 95% CI 1.22-1.28) than patients in sites with no or low EDP.

**Conclusions:** Acquisition of an AOBP machine was associated with a decrease in EDP levels. Sites with higher rates of EDP had lower mean BPs and a higher frequency of adverse cardiovascular outcomes. The routine use of manual office-based BP measurement should be reconsidered.

### Strengths and limitations of this study

- The study found that the purchase of AOBP machines by primary care offices was followed by more accurate BP measurement
- Offices with less accurate BP measurement (more end digit preference) rounded BP readings down
- These offices also had higher frequencies of adverse cardiovascular outcomes
- The survey of AOBP machine purchase was done only in Ontario; we infer that the purchase of an AOBP machine was associated with less end digit preference elsewhere

## Introduction:

High blood pressure (BP) is a leading cause of increased morbidity and early mortality in adults.<sup>1</sup> BP should be routinely measured as part of clinical encounters.<sup>2</sup> However, there are long standing concerns about the precision and accuracy of BP measurement in practice.<sup>3,4</sup> There is evidence that measuring BP manually, using an aneroid or mercury column sphygmomanometer, is associated with systematic recording errors including end digit preference (EDP) and observer bias.<sup>5</sup> EDP means that the observer rounds off the last digit;<sup>6</sup> for example, BPs end in zero for up to 60% of records instead of the expected 10%.<sup>7,8</sup> Observer bias means that BP is adjusted towards a preferred level (rounding up or rounding down).<sup>8</sup> These issues may lead to errors in the diagnosis and treatment of hypertension.<sup>9</sup>

Automated Office BP (AOBP) measurement uses a machine to record and report the numerical values of systolic and diastolic BPs on a digital display.<sup>10</sup> Three to six recordings are done; the initial reading is discarded and the remaining readings are averaged.<sup>11</sup> Research suggests that EDP is reduced as a result of this method.<sup>9,11</sup> AOBP is comparable to the gold standard of 24-hour automated home BP monitoring.<sup>12</sup> Canadian and European hypertension guidelines now recommend AOBP as the preferred method for office-based measurement of BP,<sup>2,13</sup> but have not made a recommendation to discontinue the routine use of manual BP measurement.

There is evidence that AOBP machines are increasingly used in primary care; it has been reported that more than 10,000 AOBP machines are currently in use in Canada.<sup>11</sup> In a recent Canadian survey, 43% of family physicians reported using AOBP to screen for hypertension.<sup>14</sup> However, the proportion of office BP measurements done using AOBP when machines are available in an office is not known. Changes in the proportion of BPs with EDP could serve as a marker of increasing use of AOBP in primary care practice, though this requires validation.

Accurate measurement is essential for BP control. There is a need to quantify systematic BP measurement errors in primary care, consider these in the context of changing AOBP use and estimate the effects of errors on cardiovascular outcomes affected by BP control.

The objectives of this study were therefore to (1) report the EDP levels with respect to patient and provider-level characteristics, (2) examine the changes in EDP with AOBP uptake in offices, (3) quantify prevalence and trends in systematic recording errors in BP recording and (4) determine associations between EDP and cardiovascular outcomes.

## Methods:

We used a repeated cross-sectional observational design. We applied the STrengthening the Reporting of OBServational studies in Epidemiology (STROBE) checklist for reporting observational studies.<sup>15</sup>

## Settings and Data sources

### Canada

The Canadian Primary Care Sentinel Surveillance Network (CPCSSN) database was used for this study.<sup>16</sup> CPCSSN is Canada's largest electronic medical record (EMR)-based chronic disease surveillance system<sup>16</sup> and includes data collected from eleven primary care practice based research networks in 8 of Canada's 13 provinces and territories. Consenting family physicians and other primary care providers participating in CPCSSN contribute de-identified EMR data to regional network repositories; patients can opt-out if they choose to do so. Data from all participating networks are collected every six months and aggregated in a single central database.<sup>16</sup> The distribution of the CPCSSN patient population is reasonably similar to that of Canadian census.<sup>17</sup>

We used EMR data extracted and processed using procedures previously described.<sup>16</sup> CPCSSN case definition algorithms have been validated against chart audits for eight chronic conditions (diabetes, hypertension, chronic obstructive pulmonary disease, depression, osteoarthritis, dementia, parkinsonism and epilepsy) in multiple sites across Canada.<sup>18</sup>

### U.K.

We repeated the analyses using the Royal College of General Practitioners (RCGP) Research and Surveillance Centre (RSC) database for the UK. This is one of Europe's oldest primary care sentinel networks.<sup>6</sup> It has been reported that the RCGP RSC has data of high quality for chronic disease, including diabetes<sup>6</sup> and cardiovascular outcomes.<sup>19</sup>

The RCGP RSC data are extracted twice weekly from the EMRs of >150 representative general practices (groups of physicians practicing in the same location) in England, covering a population of over 1.5 million patients and 3% of the population. A comparison of RCGP RSC practices with national pay-for-performance data, prescribing data, and the quality and outcomes framework suggests that data are representative of the national population in terms of age and gender of the population, ethnicity and deprivation.<sup>6</sup> RCGP RSC includes comprehensive recording of cardiovascular risk factors and outcomes.<sup>20</sup>

### Study population

We used routinely collected clinical electronic medical record (EMR) data from primary care clinics across Canada and the UK. These data were extracted in Canada as of June 30<sup>th</sup>, 2016 and in the UK as of December 31<sup>st</sup> 2016. We examined BP measurements taken between January 1<sup>st</sup>, 2006 and December 31<sup>st</sup>, 2015 in the CPCSSN database and in the RCGP RSC database. We included all patients who were at least 18 years of age as of BP measurement date. We identified patient characteristics that may influence BP and its measurement. Patient variables included: age; sex; presence of hypertension and/or diabetes; body mass index (BMI); use of hypertensive medications. We recorded the total number of patients included for each site; a site was a group of physicians practicing in the same location.

## Statistical Analysis

We examined the proportions of BPs ending in each digit in Canada and UK. We used the entire collection of BP records in both databases to estimate the unadjusted frequency of last digit zero for both systolic and diastolic BPs with respect to patient, site and temporal characteristics.

Since many patients had BP recorded multiple times with irregular visit to primary care between Jan 2006 to Dec 2015, we chose to discard excess information using a sampling mechanism.<sup>21</sup> In particular, we generated 1000 independent replicates using the stratified sampling without replacement where one BP measurement was randomly chosen for a given patient. Logistic regression was performed on 1000 independently sampled replicates of the CPCSSN and RCGP RSC database. The odds ratios were estimated using the mean and 95% confidence intervals were estimated using the 2.5% and 97.5% percentiles of one thousand bootstrap estimates.<sup>22</sup> All covariates in the regression model were held constant to their latest value for each patient with respect to the study follow-up. For example, the most recent information on BMI or the diagnosis of diabetes or hypertension medication was used for each patient. We adjusted for patient variables that may influence BP or its measurement: age; sex; presence of hypertension and/or diabetes; BMI; use of hypertensive medications. We also adjusted for the size of the practice panels, as this may influence quality of care. Finally, we adjusted for year of measurement as EDP levels changed over time.

To correlate rates of EDP with AOBP uptake, we conducted a subgroup analysis using data from UTOPIAN, the University of Toronto Practice Based Research Network. UTOPIAN is the largest network in CPCSSN, with about 25% of data in the national database; it includes providers and patients from Toronto and surrounding areas in southern Ontario, Canada. We collected data on AOBP use from UTOPIAN practices using a survey, shown in supplementary materials. We contacted office representatives through email/phone and asked them whether there was an AOBP in the office and when it was purchased. Office representatives were also asked to estimate how often BPs were done with the machine in the past year.

Responses were linked with EMR based blood pressure measurements for each site and the linked data were used for the subgroup analysis. We examined the association between length of time the machine was present in the office and the rate of EDP, as well as association between EDP for 2015 and the self-reported level of use in the past year.

We implemented unsupervised cluster analysis to categorize primary care sites into three groups for each year.<sup>23</sup> The three groups were labeled as: (1) high EDP; (2) medium EDP; and (3) low or no EDP. Practices were clustered by presence of less commonly recorded end digits (1,3,7,9) for both sBP and dBP; 40% of BPs would be expected to end in one of those digits. To control for excessive noise in the data, we chose to exclude the sites with less than 1000 BP measurements within a year.



1  
2  
3 Since the changes in uncommon end digits (1,3,7,9) may be confounded by the recruitment  
4 of new sites over time or changes in patient populations within sites, the proportion of  
5 recording uncommon digits was reported for each measurement year, giving a rate of EDP  
6 per site per year. The similarity between all pairs belonging to the same cluster was  
7 computed using the Ward score.<sup>24</sup> We examined the mean sBP among patients with and  
8 without hypertension and diabetes using the classification obtained from the cluster  
9 analysis.  
10  
11

12 We estimated the annual frequency of three cardiovascular events (myocardial infarct,  
13 angina, stroke) using UK data; these conditions have not yet been validated in the Canadian  
14 data in CPCSSN. We compared sites with high EDP in each year against sites with low or no  
15 EDP for the same year. The denominator was defined as the total number of patients who  
16 had at least one blood pressure recorded within each year of interest for each group. The  
17 numerator was defined as the total number of patients included in the denominator with a  
18 cardiovascular event within the same year. Patients with a cardiovascular event were  
19 censored in subsequent years. We estimated the standardized morbidity ratio for each  
20 condition in groups with high EDP compared to groups with low or no EDP.  
21  
22  
23

24 This study was reviewed and approved by the Research Ethics Board (REB) at the  
25 University of Toronto; the survey was reviewed and approved by REBs at each  
26 participating site. REB approval was not deemed to be necessary for the UK, as no patients  
27 were identified; this was classified as a service evaluation. The study received a favorable  
28 opinion from the RCGP RSC study review panel. CPCSSN has received REB approval from  
29 Health Canada, and each host university for all participating practice-based research  
30 networks. All participating primary care providers have provided written informed  
31 consent for the collection and analysis of their EMR data. All statistical analyses were  
32 conducted using SAS software, version 9.4 M4 (SAS Institute).  
33  
34  
35

### 36 **Patient and public involvement**

37  
38 No patients were involved in setting the research question or the outcome measures, nor  
39 were they involved in developing plans for design or implementation of the study. We  
40 received input into the study from Patient and Public representatives who commented on  
41 the relevance of the question and the potential impact of the research on outcomes.  
42  
43  
44

### 45 **Results:**

46  
47 Data from 181 sites and 707,227 patients in CPCSSN were included; there were 5.5 million  
48 BP records. Data from 164 sites and 1,558,471 patients in the RCGP RSC database were  
49 included; there were 13.4 million BP records. Each patient was counted once, regardless of  
50 the number of BPs and number of years in which they had a BP recorded. The most  
51 frequently recorded end digit was zero while the least frequent end digits were one, three,  
52 seven and nine (Table 1, Figure 1).  
53  
54  
55  
56  
57  
58  
59  
60

1  
2  
3 Patient and site characteristics and trends in levels of EDP are shown in table 2. The  
4 frequency of last digit zero for both systolic and diastolic BP decreased by 11.2% in Canada  
5 and by 6.9% in the UK from 2006 to 2015. Table 3 describes the adjusted odds ratios (ORs)  
6 of recording zero as the last digit of systolic and diastolic BP. The ORs of last digit zero were  
7 greater among female patients (CPCSSN: OR=1.10, 95% CI 1.09-1.11; RCGP: OR=1.16, 95%  
8 CI 1.15-1.16). Patients with hypertension were less likely to have EDP than patients  
9 without hypertension (CPCSSN: OR=0.89, 95% CI 0.88-0.91; RCGP RSC: OR=0.79, 95% CI  
10 0.78-0.80). Patients with diabetes were less likely to have EDP in Canada (OR=0.98 95%  
11 CI: 0.96-0.99) but were more likely to have this in the UK (OR=1.025 95% CI:1.01-1.04).  
12 ORs of EDP decreased as BMI levels increased in Canada but not in the UK.  
13  
14  
15

16 65 UTOPIAN sites were surveyed; 55 (85%) responded. 93% of the UTOPIAN sites  
17 reported having at least one AOBP machine in the practice; most were bought between  
18 2007 and 2014. Even when AOBP machines were present, most offices reported still using  
19 manual measurement. There was a reduction of 9.3% (from 41.7% to 32.5%) in the  
20 proportion of systolic BPs ending in zero within three years of adopting the AOBP  
21 machines (95% CI: -8.9% to -9.8%). Family practices who reported rarely or never using  
22 AOBP machines had higher end digit preference than those reporting at least some use of  
23 AOBP (Figure 2).  
24  
25

26  
27 As illustrated in Figure 3, cluster analyses were used to find the optimal decision  
28 boundaries to classify sites into high EDP, medium EDP, low or no EDP for Canada and UK.  
29 Table 4 provides the number and percentage of sites in each group. In 2006 there was only  
30 one Canadian site (3.6%) with low or no EDP while in the UK, 61 sites (38.4%) were in this  
31 group. Sites exhibiting high EDP decreased by 47.7% in Canada and by 15.1% in the UK  
32 from 2006 to 2015. In contrast, the proportion of sites classified as having low or no EDP  
33 increased by 22.9% in Canada and 12.8% in the UK.  
34  
35

36 The mean systolic BP by EDP group is shown on Table 5. Sites with low or no EDP had a  
37 higher mean systolic BP than sites with high EDP (1.97mmHg in Canada; 1.76mmHg in UK).  
38 When stratified by presence or absence of hypertension or diabetes, the direction was  
39 similar with differences ranging from 0.9 to 2.4 mm Hg.  
40  
41

42 As shown in figure 4, we observed a higher mean frequency of myocardial infarct (0.40%,  
43 95% CI 0.39 to 0.41), stroke (0.64%, 95% CI 0.63 to 0.65) and angina (0.42%, 95% CI 0.41  
44 to 0.43) in sites with high EDP as compared to sites with low or no EDP: 0.34% (95% CI  
45 0.33 to 0.35), 0.56% (95% CI 0.55 to 0.57) and 0.33% (95% CI 0.32 to 0.34 ) respectively.  
46 Table 6 provides the standardized morbidity ratio; this was higher for all three conditions  
47 for sites with high EDP compared to sites with low or no EDP.  
48  
49

## 50 Discussion:

51  
52 We found significant levels of systematic recording errors in BP measurement in the UK  
53 and Canada; these decreased over time. There was an association between the length of  
54 time an AOBP machine was present in an office and a decrease in EDP. Higher rates of EDP,  
55  
56  
57  
58  
59  
60

1  
2  
3 and presumably more use of manual BP recording in those sites, appeared to be associated  
4 with rounding down of BPs and a higher frequency of adverse cardiovascular outcomes.  
5

6  
7 Our study found decreasing rates of in EDP; there have been increasingly strong guideline  
8 recommendations to switch to AOBP.<sup>2,25</sup> While a recent survey found that almost half of  
9 Canadian physicians reported using AOBP to screen for hypertension,<sup>14</sup> most offices in this  
10 study reported continued use of manual BP measurement for some patients even when an  
11 AOBP machine was present in the office. We found a gradual decrease in EDP associated  
12 with the length of time that AOBP has been present in the office, indicating that physicians  
13 and sites may be increasingly accustomed to its routine use for measurement.  
14

15  
16 European Guidelines recommending adoption of AOBP were associated with a large  
17 decrease in recorded blood pressures ending in zero in the U.K., from 71.2% in 1996-1997  
18 to 36.7% in 2005-2006.<sup>26</sup> UK studies based on the Quality Improvement in Chronic Kidney  
19 Disease (QICKD) trial<sup>27</sup> have shown reductions over time, presumably related to the  
20 progressive introduction of AOBP – though this assumption was not validated.<sup>28</sup> In  
21 addition, there were changes in the patterns of recording odd vs. even terminal digits.  
22 Another study in China also noted decreases in EDP over time.<sup>29</sup> Implementation of AOBP  
23 in offices thus appears to be correlated with decreases in EDP.<sup>3,7,26</sup>  
24  
25

26  
27 The use of AOBP measurement resulted in lower readings than manual BP measurement  
28 (by 5 to 10 mmg Hg) in a randomized controlled trial (RCT); AOBP readings agreed more  
29 closely with the gold standard of 24 hour BP measurement than manual BP readings.<sup>11</sup> The  
30 introduction of AOBP should therefore be associated with a combination of lower rates of  
31 EDP (greater precision) and lower BP readings that are more consistent with the gold  
32 standard (greater accuracy). An observational study, however, found an association  
33 between higher rates of EDP and lower mean systolic BP, by 2 to 3 mm Hg.<sup>26</sup> A study in the  
34 UK found that the change from manual to AOBP in primary care practices resulted in lower  
35 rates of EDP but no changes in mean BP.<sup>3</sup>  
36  
37

38  
39 We found that sites with low or no EDP (those presumably using AOBP more consistently)  
40 had a mean BP that was close to 2 mm Hg higher than those with greater rates of EDP (and  
41 presumably more use of manual BP in the practice) rather than the expected 5 mm Hg  
42 lower. Therefore, observer errors associated with manual BP may have resulted in both  
43 rounding towards zero and systematically rounding down. Rounding down was observed  
44 for patients with diabetes and hypertension as well as for those without these conditions.  
45 This could potentially lead to under-diagnosis of hypertension and under-treatment of  
46 diagnosed hypertension. While there was no clinically significant association between  
47 measurement precision and presence of BP lowering medication (ORs close to 1), our data  
48 does not permit us to determine whether more precise measurement was associated with  
49 medication intensification through increase in dosage or addition of more medications.  
50 This could benefit from additional research.  
51  
52

53  
54 A possible explanation for the observation of rounding down is provided by prospect  
55 theory, used in behavioral economics, which describes decisions made under conditions of  
56 uncertainty. Negative perceptions about possible risks (or risk aversion) outweigh positive  
57  
58

1  
2  
3 perceptions about possible gains.<sup>30</sup> There may be a behavioral bias towards rounding  
4 down; this may avoid perceived risks associated with adding more medications with less  
5 emphasis on gains from cardiovascular outcome prevention.  
6

7  
8 A large cluster RCT (CHAP) documented improved management of hypertension in  
9 communities randomized to the intervention. This consisted of more accurate AOBP-based  
10 measurement in pharmacies with forwarding of abnormal BP results to family physicians.<sup>31</sup>  
11 The CHAP intervention resulted in a significant decrease in hospitalizations due to  
12 cardiovascular disease (myocardial infarction, stroke, heart failure).<sup>31</sup> In that trial, there  
13 was an improvement in BP from a mean of 142 mm Hg to 123 mm Hg when the initial  
14 pharmacy-based reading was elevated.<sup>32</sup> Systematically more accurate measurement of BP  
15 through the use of AOBP in the community, followed by notification of the primary care  
16 provider when BP was elevated, may have resulted in more treatment of elevated BP in  
17 primary care and decreased adverse cardiovascular outcomes.  
18  
19

20  
21 The results in this real world observational study in two countries are plausibly consistent  
22 with those of the CHAP RCT. We found that practices with greater precision for BP  
23 measurement (less EDP) also had a lower prevalence of adverse cardiovascular outcomes  
24 for their patients. It is possible that these practices were using AOBP more often and were  
25 thus measuring BP with greater accuracy. Systematic rounding down associated with  
26 higher rates of EDP and presumably greater use of manual BP measurement by practices in  
27 this study appeared to be associated with an elevated frequency of adverse cardiovascular  
28 outcomes.  
29  
30

31 A switch to routine use of AOBP for most office-based BP measurements would require the  
32 purchase of enough machines to support the number of physicians and patients in each  
33 office, training of staff and health care providers, and changes in offices processes to  
34 support more consistent use of AOBP. We are not aware of financial or other practice level  
35 incentives in either country promoting this change.  
36  
37  
38

### 39 **Limitations**

40  
41  
42 The study has several strengths. We used data from routine community-based primary  
43 care. We also included a large sample of both patients and primary care providers from  
44 multiple settings across Canada and the UK, observed over a decade or more. Therefore,  
45 this study reasonably reflects current clinical practices for individuals receiving primary  
46 care in both countries.  
47  
48

49 This study has several shortcomings. This was a convenience sample of primary care  
50 practices that contributed EMR data to CPCSSN and the RCGP RSC. We surveyed practices  
51 for their use of AOBP in one network only (UTOPIAN); the survey was done at the office  
52 level rather than by physician. There may be recall bias and the actual proportion of  
53 patients whose BP was measured using an AOBP is unknown.  
54  
55  
56  
57

1  
2  
3 The study was not randomized; therefore, there may be unmeasured confounders  
4 associated with both higher incidence of cardiovascular outcomes and greater rates of EDP.  
5 These could include incentives or programs that could lead to improved precision in BP  
6 measurement along with lower rates in cardiovascular outcomes, such as quality standards  
7 or funding. Our findings are associations rather than causation. Nonetheless, the  
8 differences between groups persisted as practices switched to lower rates of EDP over time  
9 and there is no a priori reason to expect a change in unmeasured confounders in practices  
10 switching to AOBP and lower rates of EDP.  
11  
12

## 13 **Conclusions**

14  
15  
16 In conclusion, systematic measurement errors including rounding down are associated  
17 with higher rates of EDP. It is likely that this is associated with more manual BP  
18 measurement in these primary care practices and in turn is correlated with a higher risk of  
19 adverse cardiovascular outcomes at a population level, although we cannot infer a causal  
20 relationship. Our findings suggest that the continued routine use of manual measurement  
21 of BP in primary care offices may be problematic. We recommend the use of AOBP as the  
22 standard of care for measuring and monitoring BP in medical offices.  
23  
24

## 25 **Acknowledgements:**

26  
27  
28 This study received funding through a grant by the North York General Hospital  
29 Foundation's Exploration Fund. Dr Greiver held an investigator award from the  
30 Department of Family and Community Medicine, University of Toronto and was supported  
31 by a research stipend from North York General Hospital. The Canadian Primary Care  
32 Sentinel Surveillance Network was a committee of the College of Family Physicians of  
33 Canada and was funded through a contribution agreement with the Public Health Agency of  
34 Canada. The views expressed herein do not necessarily represent the views of the Public  
35 Health Agency of Canada.  
36  
37

38 None of the funding sources had any role in the writing of the manuscript or the decision to  
39 submit it for publication. None of the authors received payment to write this article by a  
40 pharmaceutical company or other agency.  
41  
42

43 The authors have no competing interests to declare.  
44

45 We are grateful to the physicians and patients who allow data sharing for the Royal College  
46 of General Practitioners (RCGP) Research and Surveillance Centre (RSC), for UTOPIAN and  
47 for other networks participating in CPCSSN. We also wish to thank EMIS, In Practice  
48 Systems, TPP SystemOne and other computerized medical record system vendors who  
49 collaborate with RCGP RSC to facilitate data extraction, and Apollo from the Wellbeing  
50 group for data extraction in the UK. The principal funding of RCGP RSC is Public Health  
51 England, for its work as a surveillance system.  
52  
53

54  
55 Michelle Greiver (MG), Frank Sullivan (FS), Sumeet Kalia (SK) and Simon de Lusignan  
56 (SdeL) contributed to conception and design. Babak Aliarzadeh (BA) was responsible for  
57  
58

1  
2  
3 acquisition of Canadian, and SdeL for UK data. Saddam Syed (SS) was responsible for  
4 conducting the survey. SK, Rahim Moineddin (RM) and William Hinton (WH) contributed  
5 substantially to the analysis of data. MG and SK with input from SdeL drafted the initial  
6 version of the article. All authors, including Teja Voruganti, Martin Dawes and John  
7 Williams contributed to the interpretation of data. All authors reviewed and revised the  
8 article for important intellectual content and gave final approval of the version to be  
9 published. MG is the guarantor of this work, with SdeL for the RCGP RSC data, and, as such,  
10 had full access to all the data in the study and takes responsibility for the integrity of the  
11 data and the accuracy of the data analysis. MG had final responsibility for the decision to  
12 submit for publication.  
13  
14  
15

16 Data are from a nationally representative Canadian repository of primary care EMR data,  
17 the Canadian Primary Care Sentinel Surveillance Network (<http://cpcssn.ca>). CPCSSN data  
18 are available to researchers as outlined in the process available on the website, [cpcssn.ca](http://cpcssn.ca) .  
19 Similarly, the Royal College of General Practitioners (RCGP) Research and Surveillance  
20 Centre (RSC) network database can be accessed by researchers following the process set  
21 out at: [www.rcgp.org.uk/rsc](http://www.rcgp.org.uk/rsc). Extra data is available by emailing  
22 [michelle.greiver@nygh.on.ca](mailto:michelle.greiver@nygh.on.ca).  
23  
24  
25  
26  
27  
28  
29  
30  
31  
32  
33  
34  
35  
36  
37  
38  
39  
40  
41  
42  
43  
44  
45  
46  
47  
48  
49  
50  
51  
52  
53  
54  
55  
56  
57  
58  
59  
60

**Table 1: Frequency of end-digits for systolic and diastolic blood pressures**

| End-digits | Canada      |              | UK          |              |
|------------|-------------|--------------|-------------|--------------|
|            | Systolic BP | Diastolic BP | Systolic BP | Diastolic BP |
| <b>0</b>   | 32.4%       | 35.9%        | 33.8%       | 34.0%        |
| <b>1</b>   | 3.6%        | 3.7%         | 4.5%        | 4.5%         |
| <b>2</b>   | 13.1%       | 10.9%        | 10.3%       | 9.6%         |
| <b>3</b>   | 3.8%        | 3.8%         | 4.8%        | 4.7%         |
| <b>4</b>   | 10.4%       | 10.0%        | 9.1%        | 9.3%         |
| <b>5</b>   | 7.2%        | 6.8%         | 8.3%        | 8.2%         |
| <b>6</b>   | 9.3%        | 8.9%         | 8.5%        | 8.4%         |
| <b>7</b>   | 3.9%        | 3.8%         | 4.9%        | 4.8%         |
| <b>8</b>   | 12.6%       | 12.4%        | 11.2%       | 11.6%        |
| <b>9</b>   | 3.8%        | 3.4%         | 4.8%        | 4.9%         |

**Table 2: Patient/site characteristics and blood pressure measurements ending in zero for both systolic BP and diastolic BP in Canada (CPCSSN) and the UK (RCGP RSC database)**

| Characteristics                      | Canada                             |                                      |                                                                                               | UK                                 |                                      |                                                                                               |
|--------------------------------------|------------------------------------|--------------------------------------|-----------------------------------------------------------------------------------------------|------------------------------------|--------------------------------------|-----------------------------------------------------------------------------------------------|
|                                      | Number of Patients (% of patients) | Number of Blood Pressures (% of BPs) | Number of BPs with both systolic and diastolic BP ending in zero (% with both ending in zero) | Number of Patients (% of patients) | Number of Blood Pressures (% of BPs) | Number of BPs with both systolic and diastolic BP ending in zero (% with both ending in zero) |
| <b>Total</b>                         | 707,227                            | 5,503,663                            | 1,044,031 (19.0%)                                                                             | 1,558,471                          | 13,424,678                           | 2,674,497 (19.9%)                                                                             |
| <b>Age in years</b>                  |                                    |                                      |                                                                                               |                                    |                                      |                                                                                               |
| <b>18 to 39</b>                      | 189,254 (26.8%)                    | 816,136 (14.8%)                      | 165,025 (20.2%)                                                                               | 531,632 (34.1%)                    | 2,330,344 (17.4%)                    | 538,786(23.1%)                                                                                |
| <b>40 to 59</b>                      | 247,771 (35%)                      | 1,534,126 (27.9%)                    | 292,435 (19.1%)                                                                               | 498,272 (32.0%)                    | 3,298,174 (24.6%)                    | 631,260(19.1%)                                                                                |
| <b>60 to 79</b>                      | 201,364 (28.5%)                    | 2,115,655 (38.4%)                    | 377,724 (17.9%)                                                                               | 352,483 (22.6%)                    | 4,879,583 (36.3%)                    | 868,894(17.8%)                                                                                |
| <b>80+</b>                           | 68,838 (9.7%)                      | 1,037,716 (18.9%)                    | 208,847 (20.1%)                                                                               | 176,084 (11.3%)                    | 2,916,577 (21.7%)                    | 635,557(21.8%)                                                                                |
| <b>Sex</b>                           |                                    |                                      |                                                                                               |                                    |                                      |                                                                                               |
| <b>Female</b>                        | 414,644 (58.6%)                    | 3,325,256 (60.4%)                    | 648,357 (19.5%)                                                                               | 901,866 (57.9%)                    | 8,133,678 (60.6%)                    | 1,708,742(21.0%)                                                                              |
| <b>Male</b>                          | 292,583 (41.4%)                    | 2,178,377 (39.6%)                    | 395,674 (18.2%)                                                                               | 656,605 (42.13%)                   | 5,291,000 (39.4%)                    | 965,755(18.3%)                                                                                |
| <b>BMI range</b>                     |                                    |                                      |                                                                                               |                                    |                                      |                                                                                               |
| <b>Underweight (BMI &lt;18.5)</b>    | 10,233 (1.4%)                      | 70,776 (1.3%)                        | 14,649 (20.7%)                                                                                | 44,654 (2.9%)                      | 308,481 (2.3%)                       | 71,234(23.1%)                                                                                 |
| <b>Normal weight (18.5 to 24.9)</b>  | 170,684 (24.1%)                    | 1,177,970 (21.4%)                    | 236,883 (20.1%)                                                                               | 560,214 (36.0%)                    | 4,071,114 (30.3%)                    | 852,192(20.9%)                                                                                |
| <b>Overweight (25 to 29.9)</b>       | 182,141 (25.8%)                    | 1,545,777 (28.1%)                    | 283,163 (18.3%)                                                                               | 446,850(28.7%)                     | 4,412,326 (32.9%)                    | 842,338(19.1%)                                                                                |
| <b>Obesity class I (30 to 34.9)</b>  | 101,980 (14.4%)                    | 1,013,286 (18.4%)                    | 175,781 (17.3%)                                                                               | 200,761 (12.9%)                    | 2,421,241 (18.0%)                    | 455,572(18.8%)                                                                                |
| <b>Obesity class II (35 to 39.9)</b> | 42,235 (6.0%)                      | 468,239 (8.5%)                       | 77,408 (16.5%)                                                                                | 71,450 (4.6%)                      | 928,259 (6.9%)                       | 176,969(19.1%)                                                                                |
| <b>Obesity class III (≥40)</b>       | 27,451 (3.9%)                      | 320,682 (5.8%)                       | 52,327 (16.3%)                                                                                | 37,370 (2.4%)                      | 491,533 (3.7%)                       | 96,589(19.7%)                                                                                 |
| <b>Not available</b>                 | 172,503 (24.4%)                    | 906,903 (16.5%)                      | 203,820 (22.5%)                                                                               | 197,172 (12.7%)                    | 791,724 (5.9%)                       | 179,603(22.7%)                                                                                |
| <b>Diabetes</b>                      |                                    |                                      |                                                                                               |                                    |                                      |                                                                                               |



|                                     |                 |                   |                 |                   |                    |                  |
|-------------------------------------|-----------------|-------------------|-----------------|-------------------|--------------------|------------------|
| <b>Yes</b>                          | 86,103 (12.2%)  | 1,299,693 (23.6%) | 233,944 (18%)   | 65,335(4.2%)      | 1,909,804 (14.2%)  | 359,324(18.8%)   |
| <b>No</b>                           | 621,124 (87.8%) | 4,203,940 (76.4%) | 810,087 (19.3%) | 1,493,136 (95.1%) | 11,514,874 (85.8%) | 2,315,173(20.1%) |
| <b>Hypertension</b>                 |                 |                   |                 |                   |                    |                  |
| <b>Yes</b>                          | 185,508 (26.2%) | 2,704,921 (49.1%) | 486,787 (18%)   | 235,716 (15.1%)   | 6,359,131 (47.4%)  | 1,141,665(18.0%) |
| <b>No</b>                           | 521,719 (73.8%) | 2,798,712 (50.9%) | 557,244 (19.9%) | 1,322,755 (84.9%) | 7,065,547 (52.6%)  | 1,532,832(21.7%) |
| <b>Hypertension medications</b>     |                 |                   |                 |                   |                    |                  |
| <b>Yes</b>                          | 125,484 (17.7%) | 2,704,947 (49.1%) | 395,371 (17.7%) | 466,800 (30.0%)   | 8,327,009 (62.0%)  | 1,571,464(18.9%) |
| <b>No</b>                           | 581,743 (82.3%) | 2,798,686 (50.9%) | 648,660 (19.8%) | 1,091,671 (70.1%) | 5,097,669 (38.0%)  | 1,103,033(21.6%) |
| <b>Practice site size</b>           |                 |                   |                 |                   |                    |                  |
| <b>1st quartile (smallest site)</b> | 36,363 (5.1%)   | 249,957 (4.5%)    | 63,781 (25.5%)  | 173,610(11.1%)    | 1,671,387 (12.5%)  | 303,084(18.1%)   |
| <b>2nd quartile</b>                 | 77,776 (11%)    | 584,575 (10.6%)   | 110,411 (18.9%) | 305,460(19.6%)    | 2,836,288 (21.1%)  | 480,604(16.9%)   |
| <b>3rd quartile</b>                 | 156,601 (22.1%) | 1,156,892 (21.0%) | 228,521 (19.8%) | 416,580(26.7%)    | 3,774,278 (28.1%)  | 846,481(22.4%)   |
| <b>4th quartile (largest site)</b>  | 436,487 (61.7%) | 3,512,209 (63.8%) | 641,318 (18.3%) | 662,821(42.5%)    | 5,142,725 (38.3%)  | 1,044,328(20.3%) |
| <b>Measurement year*</b>            |                 |                   |                 |                   |                    |                  |
| <b>2006</b>                         | 52,168 (7.4%)   | 121,355 (2.2%)    | 32,335 (26.6%)  | 542,695(34.8%)    | 1,347,400 (10.0%)  | 325,843(24.2%)   |
| <b>2007</b>                         | 81,699 (11.6%)  | 183,591 (3.3%)    | 49,030 (26.7%)  | 553,033(35.5%)    | 1,342,979 (10.1%)  | 303,477(22.6%)   |
| <b>2008</b>                         | 125,781(17.8%)  | 277,858 (5.0%)    | 72,772 (26.2%)  | 563,222(36.1%)    | 1,353,092 (10.1%)  | 288,418(21.3%)   |
| <b>2009</b>                         | 167,345(23.7%)  | 368,245 (6.7%)    | 94,871 (25.8%)  | 572,940(36.8%)    | 1,358,664 (10.1%)  | 278,829(20.5%)   |
| <b>2010</b>                         | 213,250(30.2%)  | 531,316 (9.7%)    | 117,612 (22.1%) | 580,069(37.2%)    | 1,340,279 (10.0%)  | 266,242(19.9%)   |
| <b>2011</b>                         | 263,691(37.3%)  | 615,364 (11.2%)   | 125,282 (20.4%) | 590,921(37.9%)    | 1,354,956 (10.1%)  | 257,309(19.0%)   |
| <b>2012</b>                         | 299,590(42.4%)  | 700,903 (12.7%)   | 128,192 (18.3%) | 602,642(38.7%)    | 1,347,042 (10.0%)  | 249,344(18.5%)   |
| <b>2013</b>                         | 332,809(47.1%)  | 813,009 (14.8%)   | 133,434 (16.4%) | 617,073(39.6%)    | 1,366,085 (10.2%)  | 246,754(18.1%)   |
| <b>2014</b>                         | 360,180(50.9%)  | 894,350 (16.3%)   | 137,181 (15.3%) | 612,382(39.3%)    | 1,325,141 (9.9%)   | 235,377(17.8%)   |
| <b>2015</b>                         | 386,541(54.7%)  | 997,642 (18.1%)   | 153,322 (15.4%) | 594,589(38.2%)    | 1,289,040 (9.6%)   | 222,904(17.3%)   |

\*considering repeated measurements of blood pressure for each patient with respect to measurement year.

BMI - body mass index (weight in kg / height in meters<sup>2</sup>)

**Table 3: Adjusted odds ratios of recording zero as the last digit for both systolic and diastolic blood pressure by patient and site characteristics**

| Effect                   | Index Group                       | Reference group             | Canada     |                         |        |         | UK         |                         |       |         |
|--------------------------|-----------------------------------|-----------------------------|------------|-------------------------|--------|---------|------------|-------------------------|-------|---------|
|                          |                                   |                             | Odds ratio | 95% confidence interval |        | P-value | Odds ratio | 95% confidence interval |       | P-value |
| Age                      | 18 to 39                          | 80+                         | 1.088      | 1.063                   | 1.112  | <0.001  | 0.784      | 0.773                   | 0.795 | <0.001  |
|                          | 40 to 59                          | 80+                         | 1.012      | 0.990                   | 1.034  | 0.294   | 0.788      | 0.777                   | 0.798 | <0.001  |
|                          | 60 to 79                          | 80+                         | 0.942      | 0.923                   | 0.963  | <0.001  | 0.783      | 0.772                   | 0.794 | <0.001  |
| Sex                      | Female                            | Male                        | 1.100      | 1.089                   | 1.112  | <0.001  | 1.156      | 1.148                   | 1.163 | <0.001  |
| BMI                      | Underweight (BMI <18.5)           | Obesity class III (BMI ≥40) | 1.316      | 1.267                   | 1.366  | <0.001  | 1.047      | 1.019                   | 1.074 | 0.001   |
|                          | Normal (BMI 18.5 to 24.9)         | Obesity class III           | 1.226      | 1.192                   | 1.258  | <0.001  | 0.960      | 0.939                   | 0.980 | <0.001  |
|                          | Overweight (BMI 25 to 29.9)       | Obesity class III           | 1.135      | 1.104                   | 1.166  | <0.001  | 0.947      | 0.926                   | 0.966 | <0.001  |
|                          | Obesity class I (BMI 30 to 34.9)  | Obesity class III           | 1.065      | 1.036                   | 1.096  | <0.001  | 0.953      | 0.932                   | 0.973 | <0.001  |
|                          | Obesity class II (BMI 35 to 39.9) | Obesity class III           | 1.008      | 0.978                   | 1.040  | 0.618   | 0.967      | 0.943                   | 0.992 | 0.007   |
| Diabetes                 | Yes                               | No                          | 0.982      | 0.964                   | 0.999  | 0.047   | 1.025      | 1.008                   | 1.042 | 0.004   |
| Hypertension             | Yes                               | No                          | 0.892      | 0.877                   | 0.908  | <0.001  | 0.790      | 0.780                   | 0.799 | <0.001  |
| Hypertension medications | Yes                               | No                          | 0.967      | 0.947                   | 0.986  | 0.001   | 1.057      | 1.047                   | 1.068 | <0.001  |
| Practice Site size       | 1st quartile (smallest site)      | 4th quartile (largest site) | 1.950      | 1.908                   | 1.990  | <0.001  | 0.816      | 0.809                   | 0.823 | <0.001  |
|                          | 2nd quartile                      | 4th quartile (largest site) | 1.075      | 1.058                   | 1.094  | <0.001  | 0.893      | 0.885                   | 0.900 | <0.001  |
|                          | 3rd quartile                      | 4th quartile (largest site) | 1.087      | 1.074                   | 1.100  | <0.001  | 0.891      | 0.883                   | 0.899 | <0.001  |
| Measurement year         | 2006                              | 2015                        | 1.910      | 1.833                   | 1.990  | <0.001  | 1.647      | 1.625                   | 1.668 | <0.001  |
|                          | 2007                              | 2015                        | 1.923      | 1.857                   | 1.989  | <0.001  | 1.473      | 1.451                   | 1.494 | <0.001  |
|                          | 2008                              | 2015                        | 1.840      | 1.790                   | 1.895  | <0.001  | 1.376      | 1.357                   | 1.396 | <0.001  |
|                          | 2009                              | 2015                        | 1.858      | 1.815                   | 1.903  | <0.001  | 1.321      | 1.300                   | 1.341 | <0.001  |
|                          | 2010                              | 2015                        | 1.582      | 1.548                   | 1.617  | <0.001  | 1.257      | 1.238                   | 1.275 | <0.001  |
|                          | 2011                              | 2015                        | 1.379      | 1.352                   | 1.407  | <0.001  | 1.178      | 1.161                   | 1.196 | <0.001  |
|                          | 2012                              | 2015                        | 1.239      | 1.216                   | 1.262  | <0.001  | 1.112      | 1.094                   | 1.129 | <0.001  |
|                          | 2013                              | 2015                        | 1.096      | 1.077                   | 1.116  | <0.001  | 1.052      | 1.038                   | 1.067 | <0.001  |
| 2014                     | 2015                              | 1.037                       | 1.021      | 1.052                   | <0.001 | 1.016   | 1.000      | 1.030                   | 0.041 |         |

BMI - body mass index (weight in kg / height in meters<sup>2</sup>)

Odds ratios were adjusted for patient age, sex, presence of hypertension and/or diabetes, BMI, use of hypertensive medications. ORs were also adjusted for the size of the practice panels and year of measurement

**Table 4: Number and percentage of sites in each EDP group from 2006 to 2015**

| Year | Canada        |             |            |             |          |             | UK            |             |            |             |          |             |
|------|---------------|-------------|------------|-------------|----------|-------------|---------------|-------------|------------|-------------|----------|-------------|
|      | Low or no EDP |             | Medium EDP |             | High EDP |             | Low or no EDP |             | Medium EDP |             | High EDP |             |
|      | N             | Percent (%) | N          | Percent (%) | N        | Percent (%) | N             | Percent (%) | N          | Percent (%) | N        | Percent (%) |
| 2006 | 1             | 3.6%        | 1          | 3.6%        | 26       | 92.9%       | 61            | 38.4%       | 39         | 24.5%       | 59       | 37.1%       |
| 2007 | 3             | 7.3%        | 3          | 7.3%        | 35       | 85.4%       | 69            | 42.9%       | 41         | 25.5%       | 51       | 31.7%       |
| 2008 | 8             | 13.8%       | 3          | 5.2%        | 47       | 81.0%       | 71            | 44.1%       | 45         | 28.0%       | 45       | 28.0%       |
| 2009 | 8             | 11.1%       | 7          | 9.7%        | 57       | 79.2%       | 74            | 46.0%       | 45         | 28.0%       | 42       | 26.1%       |
| 2010 | 15            | 15.3%       | 11         | 11.2%       | 72       | 73.5%       | 76            | 46.6%       | 45         | 27.6%       | 42       | 25.8%       |
| 2011 | 17            | 15.5%       | 16         | 14.5%       | 77       | 70.0%       | 78            | 47.9%       | 45         | 27.6%       | 40       | 24.5%       |
| 2012 | 27            | 21.8%       | 25         | 20.2%       | 72       | 58.1%       | 82            | 50.3%       | 40         | 24.5%       | 41       | 25.2%       |
| 2013 | 33            | 22.8%       | 33         | 22.8%       | 79       | 54.5%       | 79            | 48.5%       | 48         | 29.4%       | 36       | 22.1%       |
| 2014 | 30            | 20.0%       | 41         | 27.3%       | 79       | 52.7%       | 85            | 52.1%       | 42         | 25.8%       | 36       | 22.1%       |
| 2015 | 41            | 26.5%       | 44         | 28.4%       | 70       | 45.2%       | 84            | 51.2%       | 44         | 26.8%       | 36       | 22.0%       |

EDP – End digit preference

**Table 5: Mean systolic blood pressure by EDP group**

|                         |                      | CPCSSN database (Canada) |                   |           | RCGP RSC database (UK) |                   |           |
|-------------------------|----------------------|--------------------------|-------------------|-----------|------------------------|-------------------|-----------|
|                         |                      | No. of BP measurements   | Mean sBP in mm Hg | Std. Dev. | No. of BP measurements | Mean sBP in mm Hg | Std. Dev. |
| <b>All patients</b>     | <b>Low or no EDP</b> | 1,151,795                | 128.21            | 18.92     | 5,618,800              | 135.05            | 20.09     |
|                         | <b>High EDP</b>      | 2,925,279                | 126.24            | 18.52     | 3,624,391              | 133.29            | 19.63     |
|                         | <b>Difference</b>    |                          | 1.97              |           |                        | 1.76              |           |
| <b>Hypertensive</b>     | <b>Low or no EDP</b> | 584,082                  | 134.59            | 19.29     | 2,687,218              | 142.63            | 19.03     |
|                         | <b>High EDP</b>      | 1,436,251                | 133.51            | 18.36     | 1,715,006              | 141.23            | 18.19     |
|                         | <b>Difference</b>    |                          | 1.08              |           |                        | 1.40              |           |
| <b>Non-hypertensive</b> | <b>Low or no EDP</b> | 567,713                  | 121.65            | 16.09     | 2,931,582              | 128.10            | 18.44     |
|                         | <b>High EDP</b>      | 1,489,028                | 119.23            | 15.77     | 1,909,385              | 126.15            | 18.07     |
|                         | <b>Difference</b>    |                          | 2.42              |           |                        | 1.95              |           |
| <b>Diabetic</b>         | <b>Low or no EDP</b> | 300,630                  | 131.42            | 18.81     | 823,959                | 138.89            | 18.75     |
|                         | <b>High EDP</b>      | 675,920                  | 130.52            | 18.09     | 515,843                | 136.76            | 17.79     |
|                         | <b>Difference</b>    |                          | 0.9               |           |                        | 2.13              |           |
| <b>Non-Diabetic</b>     | <b>Low or no EDP</b> | 851,165                  | 127.08            | 18.83     | 4,794,841              | 134.39            | 20.23     |
|                         | <b>High EDP</b>      | 2,249,359                | 124.96            | 18.46     | 3,108,548              | 132.71            | 19.86     |
|                         | <b>Difference</b>    |                          | 2.12              |           |                        | 1.68              |           |

EDP – End digit preference  
sBP – systolic blood pressure  
Std. Dev – standard deviation

**Table 6: Standardized morbidity ratio for groups with high EDP group when compared to groups with low or no EDP**

| Angina                       |          |                       |      |
|------------------------------|----------|-----------------------|------|
| Parameter                    | Estimate | 95% Confidence Limits |      |
| Standardized morbidity ratio | 1.25     | 1.22                  | 1.28 |
| Acute Myocardial infraction  |          |                       |      |
| Standardized morbidity ratio | 1.16     | 1.14                  | 1.19 |
| Stroke                       |          |                       |      |
| Standardized morbidity ratio | 1.15     | 1.12                  | 1.17 |

EDP – End digit preference

1  
2  
3 Figure legends  
4

5 Figure 1: Histogram of systolic and diastolic blood pressure in Canada and the UK  
6

7 Figure 2: Impact of adopting automated office blood pressure machines on end digit  
8 preference for systolic blood pressure in Toronto  
9

10 Figure 3: Proportions of systolic and diastolic BPs ending in 1, 3, 7 or 9 per practice site for  
11 each year of interest in Canada and UK from 2006 to 2015  
12

13 Figure 4: Frequency of cardiovascular events in high EDP and no or low EDP group in the  
14 UK  
15

16  
17  
18  
19  
20  
21  
22  
23  
24  
25  
26  
27  
28  
29  
30  
31  
32  
33  
34  
35  
36  
37  
38  
39  
40  
41  
42  
43  
44  
45  
46  
47  
48  
49  
50  
51  
52  
53  
54  
55  
56  
57  
58  
59  
60

For peer review only

## References:

1. World Health Organization, global health estimates. World Health Organization. Health statistics and information systems Web site. [http://www.who.int/healthinfo/global\\_burden\\_disease/en/](http://www.who.int/healthinfo/global_burden_disease/en/). Published 2016. Accessed May 29, 2016.
2. Leung AA, Nerenberg K, Daskalopoulou SS, et al. Hypertension Canada's 2016 Canadian Hypertension Education Program Guidelines for Blood Pressure Measurement, Diagnosis, Assessment of Risk, Prevention, and Treatment of Hypertension. *Can J Cardiol*. 2016;32(5):569-588.
3. McManus RJ, Mant J, Hull MR, Hobbs FD. Does changing from mercury to electronic blood pressure measurement influence recorded blood pressure? An observational study. *Br J Gen Pract*. 2003;53(497):953-956.
4. Pickering TG, Hall JE, Appel LJ, et al. Recommendations for blood pressure measurement in humans and experimental animals: Part 1: blood pressure measurement in humans: a statement for professionals from the Subcommittee of Professional and Public Education of the American Heart Association Council on High Blood Pressure Research. *Hypertension*. 2005;45(1):142-161.
5. Beevers G, Lip GY, O'Brien E. ABC of hypertension: Blood pressure measurement. Part II-conventional sphygmomanometry: technique of auscultatory blood pressure measurement. *BMJ*. 2001;322(7293):1043-1047.
6. Correa A, Hinton W, McGovern A, et al. Royal College of General Practitioners Research and Surveillance Centre (RCGP RSC) sentinel network: a cohort profile. *BMJ Open*. 2016;6(4):e011092.
7. Nietert PJ, Wessell AM, Feifer C, Ornstein SM. Effect of terminal digit preference on blood pressure measurement and treatment in primary care. *Am J Hypertens*. 2006;19(2):147-152.
8. de Lusignan S, Belsey J, Hague N, Dzregah B. End-digit preference in blood pressure recordings of patients with ischaemic heart disease in primary care. *J Hum Hypertens*. 2004;18(4):261-265.
9. Myers MG, Godwin M, Dawes M, et al. Conventional versus automated measurement of blood pressure in primary care patients with systolic hypertension: randomised parallel design controlled trial. *BMJ*. 2011;342.
10. Myers MG. Automated blood pressure measurement in routine clinical practice. *Blood Press Monit*. 2006;11(2):59-62.
11. Myers MG, Kaczorowski J, Dawes M, Godwin M. Automated office blood pressure measurement in primary care. *Can Fam Physician*. 2014;60(2):127-132.
12. Myers MG, Valdivieso M, Kiss A. Use of automated office blood pressure measurement to reduce the white coat response. *J Hypertens*. 2009;27(2):280-286.
13. Mancia G, Fagard R, Narkiewicz K, et al. 2013 ESH/ESC Guidelines for the management of arterial hypertension: the Task Force for the management of arterial hypertension of the European Society of Hypertension (ESH) and of the European Society of Cardiology (ESC). *J Hypertens*. 2013;31(7):1281-1357.
14. Kaczorowski J, Myers MG, Gelfer M, et al. How do family physicians measure blood pressure in routine clinical practice? National survey of Canadian family physicians. *Can Fam Physician*. 2017;63(3):e193-e199.
15. von Elm E, Altman DG, Egger M, et al. The Strengthening the Reporting of Observational Studies in Epidemiology (STROBE) Statement: guidelines for reporting observational studies. *Int J Surg*. 2014;12(12):1495-1499.
16. Birtwhistle R, Keshavjee K, Lambert-Lanning A, et al. Building a pan-Canadian primary care sentinel surveillance network: initial development and moving forward. *J Am Board Fam Med*. 2009;22(4):412-422.

17. *Primary health care intelligence: 2013 progress report of the Canadian Primary Care Sentinel Surveillance Network (CPCSSN)*. Kingston, Ontario: Queen's University;2013.
18. Williamson T, Green ME, Birtwhistle R, et al. Validating the 8 CPCSSN Case Definitions for Chronic Disease Surveillance in a Primary Care Database of Electronic Health Records. *The Annals of Family Medicine*. 2014;12(4):367-372.
19. Kumar S, de Lusignan S, McGovern A, et al. Ischaemic stroke, haemorrhage, and mortality in older patients with chronic kidney disease newly started on anticoagulation for atrial fibrillation: a population based study from UK primary care. *Bmj*. 2018;360:k342.
20. Hinton W, McGovern A, Coyle R, et al. Incidence and prevalence of cardiovascular disease in English primary care: a cross-sectional and follow-up study of the Royal College of General Practitioners (RCGP) Research and Surveillance Centre (RSC). *BMJ Open*. 2018;8(8):e020282.
21. Pullenayegum EM. Multiple outputation for the analysis of longitudinal data subject to irregular observation. *Stat Med*. 2016;35(11):1800-1818.
22. Davison A, Hinckley D. *Bootstrap methods and their application, Vol 1*. Cambridge, UK: Cambridge University Press; 1997.
23. James G, Witten D, Hastie T, Tibshirani R. *An Introduction to Statistical Learning - with Applications in R | Gareth James | Springer*. New York: Springer-Verlag New York; 2013.
24. Rencher AC. *Methods of Multivariate Analysis*. John Wiley & Sons; 2003.
25. Campbell NR, Kaczorowski J, Lewanczuk RZ, et al. 2010 Canadian Hypertension Education Program (CHEP) recommendations: the scientific summary - an update of the 2010 theme and the science behind new CHEP recommendations. *Can J Cardiol*. 2010;26(5):236-240.
26. Harrison WN, Lancashire RJ, Marshall TP. Variation in recorded blood pressure terminal digit bias in general practice. *J Hum Hypertens*. 2008;22(3):163-167.
27. de Lusignan S, Gallagher H, Jones S, et al. Audit-based education lowers systolic blood pressure in chronic kidney disease: the Quality Improvement in CKD (QICKD) trial results. *Kidney Int*. 2013;84(3):609-620.
28. Alsanjari ON, de Lusignan S, van Vlymen J, et al. Trends and transient change in end-digit preference in blood pressure recording: studies of sequential and longitudinal collected primary care data. *Int J Clin Pract*. 2012;66(1):37-43.
29. Wang Y, Qain Y, Zhang J, Tang X, Sun J, Zhu D. Longitudinal change in end-digit preference in blood pressure recordings of patients with hypertension in primary care clinics: Minhang study. *Blood Press Monit*. 2015;20(2):74-78.
30. Kahneman D, Tversky A. Prospect theory; an analysis of decision under risk. *Economica*. 1979;47:263-291.
31. Kaczorowski J, Chambers LW, Dolovich L, et al. Improving cardiovascular health at population level: 39 community cluster randomised trial of Cardiovascular Health Awareness Program (CHAP). *BMJ*. 2011;342.
32. Ye C, Foster G, Kaczorowski J, et al. The impact of a cardiovascular health awareness program (CHAP) on reducing blood pressure: a prospective cohort study. *BMC Public Health*. 2013;13:1230.



1  
2  
3  
4  
5  
6  
7  
8  
9  
10  
11  
12  
13  
14  
15  
16  
17  
18  
19  
20  
21  
22  
23  
24  
25  
26  
27  
28  
29  
30  
31  
32  
33  
34  
35  
36  
37  
38  
39  
40  
41  
42  
43  
44  
45  
46  
47  
48  
49  
50  
51  
52  
53  
54  
55  
56  
57  
58  
59  
60



Figure 1: Histogram of systolic and diastolic blood pressure in Canada(left) and the UK (right)



Figure 2: Impact of adopting automated office blood pressure machines on end digit preference for systolic blood pressure in Toronto

1  
2  
3  
4  
5  
6  
7  
8  
9  
10  
11  
12  
13  
14  
15  
16  
17  
18  
19  
20  
21  
22  
23  
24  
25  
26  
27  
28  
29  
30  
31  
32  
33  
34  
35  
36  
37  
38  
39  
40  
41  
42  
43  
44  
45  
46  
47  
48  
49  
50  
51  
52  
53  
54  
55  
56  
57  
58  
59  
60



Figure 3: Proportions of systolic and diastolic BPs ending in 1, 3, 7 or 9 per practice site for each year of interest in Canada (left) and UK (right) from 2006 to 2015

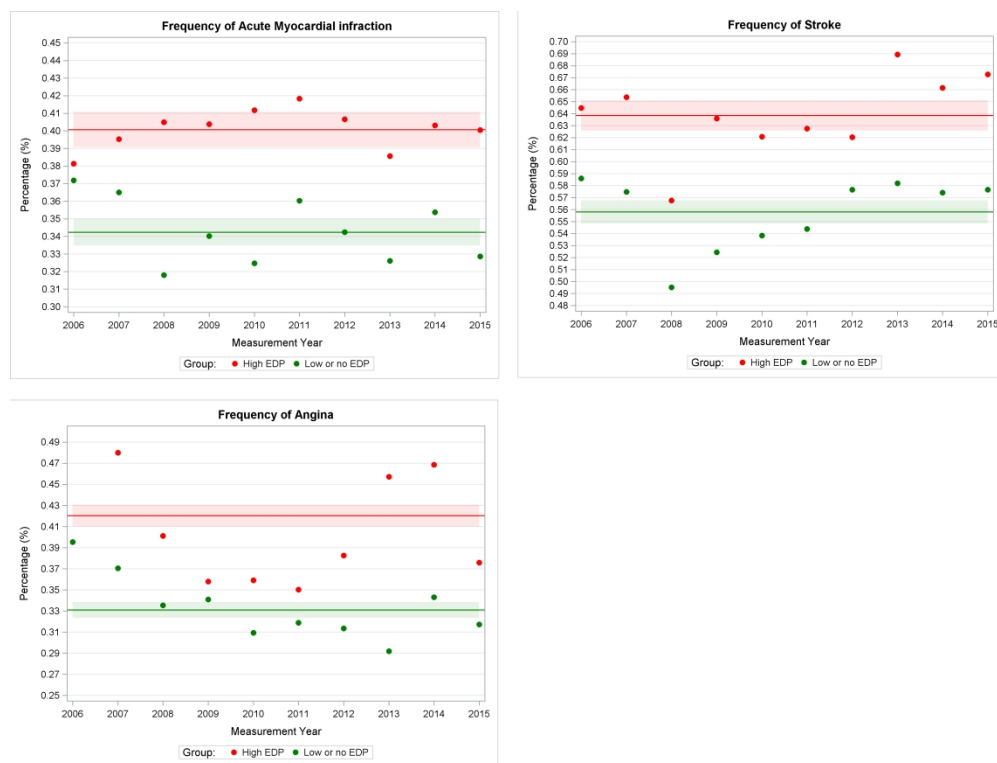

Figure 4: Frequency of cardiovascular events in high EDP and no or low EDP group in the UK

1  
2  
3  
4  
5  
6  
7  
8  
9  
10  
11  
12  
13  
14  
15  
16  
17  
18  
19  
20  
21  
22  
23  
24  
25  
26  
27  
28  
29  
30  
31  
32  
33  
34  
35  
36  
37  
38  
39  
40  
41  
42  
43  
44  
45  
46  
47  
48  
49  
50  
51  
52  
53  
54  
55  
56  
57  
58  
59  
60

1) Is there an automated machine (e.g. BPTru) in your office?

Yes [ ]

No [ ]

2) If Yes, when was the machine purchased?

Year [ ]

Month [ ]

3) If Yes, how many BP machines are there at your office?

Enter digit [ ]

4) How many exam rooms are there at your office?

Enter digit [ ]

5. Thinking of the past year, how often is the automated BP machine used to take blood pressures in your office?

-rarely or never

-some of the time

-most of the time

-almost all the time or all the time

STROBE Statement—Checklist of items that should be included in reports of *cross-sectional studies*

|                              | Item No | Recommendation                                                                                                                                                                                                                                                                                                                                                                                                    |
|------------------------------|---------|-------------------------------------------------------------------------------------------------------------------------------------------------------------------------------------------------------------------------------------------------------------------------------------------------------------------------------------------------------------------------------------------------------------------|
| <b>Title and abstract</b>    | 1       | (a) Indicate the study's design with a commonly used term in the title or the abstract:<br><b>Page 1</b>                                                                                                                                                                                                                                                                                                          |
|                              |         | (b) Provide in the abstract an informative and balanced summary of what was done and what was found: <b>Page 2</b>                                                                                                                                                                                                                                                                                                |
| <b>Introduction</b>          |         |                                                                                                                                                                                                                                                                                                                                                                                                                   |
| Background/rationale         | 2       | Explain the scientific background and rationale for the investigation being reported<br><b>Page 3-4</b>                                                                                                                                                                                                                                                                                                           |
| Objectives                   | 3       | State specific objectives, including any prespecified hypotheses <b>Page 3</b>                                                                                                                                                                                                                                                                                                                                    |
| <b>Methods</b>               |         |                                                                                                                                                                                                                                                                                                                                                                                                                   |
| Study design                 | 4       | Present key elements of study design early in the paper <b>Page 3</b>                                                                                                                                                                                                                                                                                                                                             |
| Setting                      | 5       | Describe the setting, locations, and relevant dates, including periods of recruitment, exposure, follow-up, and data collection <b>Page 4-5</b>                                                                                                                                                                                                                                                                   |
| Participants                 | 6       | (a) Give the eligibility criteria, and the sources and methods of selection of participants <b>Page 4</b>                                                                                                                                                                                                                                                                                                         |
| Variables                    | 7       | Clearly define all outcomes, exposures, predictors, potential confounders, and effect modifiers. Give diagnostic criteria, if applicable <b>Page 4</b>                                                                                                                                                                                                                                                            |
| Data sources/<br>measurement | 8*      | For each variable of interest, give sources of data and details of methods of assessment (measurement). Describe comparability of assessment methods if there is more than one group <b>Page 5-6</b>                                                                                                                                                                                                              |
| Bias                         | 9       | Describe any efforts to address potential sources of bias <b>N/A</b>                                                                                                                                                                                                                                                                                                                                              |
| Study size                   | 10      | Explain how the study size was arrived at <b>N/A</b>                                                                                                                                                                                                                                                                                                                                                              |
| Quantitative variables       | 11      | Explain how quantitative variables were handled in the analyses. If applicable, describe which groupings were chosen and why <b>Page 5-6</b>                                                                                                                                                                                                                                                                      |
| Statistical methods          | 12      | (a) Describe all statistical methods, including those used to control for confounding<br><b>Page 5-6</b><br>(b) Describe any methods used to examine subgroups and interactions <b>Page 5-6</b><br>(c) Explain how missing data were addressed <b>N/A</b><br>(d) If applicable, describe analytical methods taking account of sampling strategy<br><b>N/A</b><br>(e) Describe any sensitivity analyses <b>N/A</b> |
| <b>Results</b>               |         |                                                                                                                                                                                                                                                                                                                                                                                                                   |
| Participants                 | 13*     | (a) Report numbers of individuals at each stage of study—eg numbers potentially eligible, examined for eligibility, confirmed eligible, included in the study, completing follow-up, and analysed <b>Page 6</b><br>(b) Give reasons for non-participation at each stage <b>N/A</b><br>(c) Consider use of a flow diagram <b>N/A</b>                                                                               |
| Descriptive data             | 14*     | (a) Give characteristics of study participants (eg demographic, clinical, social) and information on exposures and potential confounders <b>Page 6</b><br>(b) Indicate number of participants with missing data for each variable of interest<br><b>Page 7</b>                                                                                                                                                    |
| Outcome data                 | 15*     | Report numbers of outcome events or summary measures <b>Page 7</b>                                                                                                                                                                                                                                                                                                                                                |
| Main results                 | 16      | (a) Give unadjusted estimates and, if applicable, confounder-adjusted estimates and their precision (eg, 95% confidence interval). Make clear which confounders were adjusted for and why they were included <b>Page 7</b>                                                                                                                                                                                        |

|                          |    |                                                                                                                                                                                            |
|--------------------------|----|--------------------------------------------------------------------------------------------------------------------------------------------------------------------------------------------|
|                          |    | (b) Report category boundaries when continuous variables were categorized <b>Page 7</b>                                                                                                    |
|                          |    | (c) If relevant, consider translating estimates of relative risk into absolute risk for a meaningful time period <b>N/A</b>                                                                |
| Other analyses           | 17 | Report other analyses done—eg analyses of subgroups and interactions, and sensitivity analyses <b>Page 7</b>                                                                               |
| <b>Discussion</b>        |    |                                                                                                                                                                                            |
| Key results              | 18 | Summarise key results with reference to study objectives <b>Page 7</b>                                                                                                                     |
| Limitations              | 19 | Discuss limitations of the study, taking into account sources of potential bias or imprecision. Discuss both direction and magnitude of any potential bias <b>Page 8-9</b>                 |
| Interpretation           | 20 | Give a cautious overall interpretation of results considering objectives, limitations, multiplicity of analyses, results from similar studies, and other relevant evidence <b>Page 7-9</b> |
| Generalisability         | 21 | Discuss the generalisability (external validity) of the study results <b>Page 9</b>                                                                                                        |
| <b>Other information</b> |    |                                                                                                                                                                                            |
| Funding                  | 22 | Give the source of funding and the role of the funders for the present study and, if applicable, for the original study on which the present article is based <b>Page 10</b>               |

\*Give information separately for exposed and unexposed groups.

**Note:** An Explanation and Elaboration article discusses each checklist item and gives methodological background and published examples of transparent reporting. The STROBE checklist is best used in conjunction with this article (freely available on the Web sites of PLoS Medicine at <http://www.plosmedicine.org/>, Annals of Internal Medicine at <http://www.annals.org/>, and Epidemiology at <http://www.epidem.com/>). Information on the STROBE Initiative is available at [www.strobe-statement.org](http://www.strobe-statement.org).
