# Supplementary material for: Trends in end digit preference for blood pressure and associations with cardiovascular outcomes in Canadian and UK primary care: a retrospective observational study
Source: PubMed Central journal article supplement — BMJ Open. 2019 Jan 24;9(1):e024970. doi: 10.1136/bmjopen-2018-024970 (PMC6347875; doi:10.1136/bmjopen-2018-024970), 2019-01-24
Supplement: bmjopen-2018-024970supp001.pdf [file bmjopen-2018-024970supp001.pdf]

1) Is there an automated machine (e.g. BPTru) in your office?

Yes [ ]

No [ ]

2) If Yes, when was the machine purchased?

Year [ ]

Month [ ]

3) If Yes, how many BP machines are there at your office?

Enter digit [ ]

4) How many exam rooms are there at your office?

Enter digit [ ]

5. Thinking of the past year, how often is the automated BP machine used to take blood pressures in your office?

-rarely or never

-some of the time

-most of the time

-almost all the time or all the time
